# Supplementary material for: Identification of conserved genes involved in nitrogen metabolic activities in wheat
Source: PeerJ. 2019 Jul 9;7:e7281. doi: 10.7717/peerj.7281 (PMC6625498; doi:10.7717/peerj.7281)
Supplement: Table S1 — (A) Oligonucleotide primers used for qPCR. (B) Statistics of clean reads. [file peerj-07-7281-s002.xlsx]

## Sheet: Table S1
Supplemental Table S1.A. Oligonucleotide primers used for qPCR.
Primer	Gene ID	Primer_F	Primer_R
lmPPA_Rel3	comp106201_c0	TCCGTGGCTACGACGTTCACT	CATCTCCTTGGCGACTGCTTT
lmUPS_Rel3	comp107474_c0	TGTTCCTGCCTCGGCTTTCTC	GACGCCCAATTTCCTCACTCA
lmNMR_Rel1	comp95880_c0	CTGCCCAAGAGCAAGTTCGTG	TATGGTGCCCAGGTTCATCCC
Actin	-	GACAATGGAACCGGAATGGTC	GTGTGATGCCAGATTTTCTCCAT
Supplemental Table S1.B. Statistics of clean reads
Samples	BMK-ID	Total reads	Total nucleotides (bp)	Q30 (%)	GC (%)
Ning7840	N0	41062839	8293982424	86.36	53.33
Ning7840	N2	43655100	8817612719	86.38	53.33
Ning7840	N4	38553790	7787182424	86.57	55.24
dlm1	N0	36006615	7272734394	86.42	53.43
dlm1	N2	41170794	8315191290	86.68	55.04
dlm1	N4	39021735	7881735543	86.3	53.43
dlm2	N0	37601195	7594821590	86.57	52.21
dlm2	N2	39718837	8022477547	86.49	53
dlm2	N4	33523566	6771210852	86.42	53
Average	_	3.89238e+07	7.86188e+09	86.4656	53.5567
Total	-	350314471	70756948783	-	-
