# Supplementary material for: Identification of conserved genes involved in nitrogen metabolic activities in wheat
Source: PeerJ. 2019 Jul 9;7:e7281. doi: 10.7717/peerj.7281 (PMC6625498; doi:10.7717/peerj.7281)
Supplement: Table S2 [file peerj-07-7281-s003.xlsx]

## Sheet: Supplementary Table S2
Supplementary Table S2. The gene expression levels in Ning7840 and the dlm mutants. N0, N2 and N4 indicate the treatment of 0 g, 2 g or 4 g of carbamide per pot, respectively.
Gene	Ning7840			dlm1			dlm2
	N0	N2	N4	N0	N2	N4	N0	N2	N4
comp100000_c0	75.84	82.24	71.94	31.05	30.11	34.05	54.55	50.75	55
comp100001_c0	7.48	6.84	4.89	7.19	6.4	11.13	8.18	9.13	8.42
comp100002_c0	62.11	118.02	128.88	155.46	120	80.12	182.66	169.9	128.74
comp100003_c0	41.96	39.48	41.81	124.21	111.13	93.5	94.75	112.7	99.07
comp100004_c0	33.26	27.85	24.07	27.85	24.59	26.55	35.06	36.52	31.5
comp100005_c0	16.09	13.66	14.08	14.5	10.29	14.42	14.02	13.55	15.07
comp100006_c0	36.28	40.37	29.65	44.63	29.59	45.76	52.48	50.58	55.78
comp100007_c1	0.19	1.06	0	0.65	0	0	0	0.36	0
comp100007_c2	43.31	41.77	28.15	23.34	17.5	27.02	37.94	28.6	32.42
comp100008_c0	43.63	46.78	47.91	36.99	49.37	46.51	41.31	42.29	45.02
comp100009_c0	24.99	19.48	15.76	41.13	36.86	49.94	41.88	33.63	42.73
comp100010_c0	29.63	42.13	53.05	43.83	75	46.72	29.11	34.14	45.94
comp100011_c0	34.6	41.39	28.91	51.79	46.73	49.06	46.55	46.87	42.02
comp100012_c0	3.19	1.97	3.41	7.05	4.1	6.02	4.15	7.1	6.36
comp100013_c0	13.6	12.12	9.39	13.01	10.24	14.16	16.06	15.31	15.34
comp100014_c0	0.23	0.42	0.47	0	0.52	0	1.2	0	0.28
comp100014_c1	4	3.5	4.04	3.2	3.03	3.37	3.98	3.21	3.82
comp100015_c0	21.5	15.71	18.57	18.75	23.88	23.91	15.04	18.3	13.23
comp100016_c0	5.08	4.8	3.81	22.04	12.21	16.41	19.27	18.32	21.89
comp100017_c0	82.62	70.23	74.15	68.86	55.94	59.86	65.81	69.54	64.67
comp100018_c0	10.91	10.44	9.74	7.54	6.97	9.45	11.68	10.06	8.45
comp100019_c0	38.08	31.9	28.89	33.12	24.62	33.85	40.08	35.68	35.59
comp100020_c0	24.52	22	21.62	27.34	21.87	26.08	36.05	25.39	19.92
comp100021_c0	30.89	17.34	16.14	24.3	13.91	21.92	23.93	21.17	21.33
comp100022_c0	8.27	10.25	7.49	7.67	5.96	9.66	9.37	7.93	8.94
comp100023_c0	4.98	7.96	6.49	1.85	2.48	1.57	2.55	1.77	2.87
comp100024_c0	0	0.45	0	0	0.22	0	0	0.69	0.6
comp100024_c1	24.31	30.96	21.47	32.1	29.23	36.11	37.59	32.54	35.52
comp100024_c2	1.08	1.13	2.2	1.73	0.7	0.65	0	1.03	0.93
comp100025_c0	9.94	7.48	7.73	6.75	5.4	6.74	7.55	8.03	6.26
comp100025_c1	0.75	0.69	0	0.28	0.44	1.33	0.26	0.46	0
comp100026_c0	26.8	18.94	47.75	17.47	6.65	18.23	18.18	17.07	15.84
comp100027_c0	1.76	2.02	1.45	2.32	2.94	2.03	1.79	2.24	1.69
comp100027_c1	17.73	19.56	16.3	26.88	22.75	25.31	29.09	26.81	26.44
comp100028_c0	12.66	13.71	11.03	16.62	13.05	17.98	19.65	17.92	19.25
comp100029_c0	0	0	0	0	0	0	0	0.27	0
comp100029_c1	27.71	9.02	17.18	31.76	30.77	33.82	31.14	25.57	29.38
comp100030_c0	13.05	9.64	14.53	12	16.37	11.41	11.02	12.07	12.97
comp100031_c0	28.63	20.08	31.61	38.87	37.23	37.82	37.42	36.2	39.14
comp100032_c0	170.86	135.21	155.89	45.36	43.04	41.05	42.91	40.86	40.56
comp100033_c0	66.76	73.55	71.72	73.18	85.59	76.98	97.97	104.41	90.13
comp100034_c0	4.87	2.71	3.81	3.59	3.83	5.75	4.87	4.4	6.09
comp100035_c0	1.33	0.92	1.32	1.46	1.17	1.62	1.29	1.29	2.02
comp100036_c0	17.83	17.52	17.78	19.91	17.44	20.74	21.86	23.44	19.94
comp100037_c0	9.47	4.02	4.46	3.45	6.31	7.72	1.61	3.48	2.12
comp100037_c1	3.26	1.55	3.03	3.05	1.67	4.54	1.68	1.31	1.37
comp100037_c2	14.91	11.37	16.31	12.96	11.37	13.69	7.53	10.07	8.35
comp100038_c0	0.94	2.23	1.2	2.04	1.23	2.16	1.59	1.73	2.04
comp100039_c0	3.33	5.21	3.32	5.21	1.45	4.68	6.45	6.27	9.3
comp100040_c0	3.01	3.07	4.92	11.06	11.19	13.9	8.75	10.59	9.58
comp100041_c0	1.67	2.88	2.88	3.26	4.2	4.58	5.91	4.97	3.79
comp100041_c1	4.33	3.72	3.5	5.33	5.31	6.59	9.71	9.74	6.27
comp100042_c0	30.79	20.49	37.42	31.35	31.82	33.42	30.87	24.68	28.86
comp100043_c0	35.28	36.33	32.57	34.9	23.1	32.64	39.57	37.42	37.95
comp100044_c0	18.04	20.59	13.41	17.09	12.66	20.47	23.29	22.08	17.06
comp100045_c0	0.13	1.02	0.7	7.56	2.66	6.53	1.23	2.99	2.19
comp100046_c0	15.32	9.65	14.06	10.25	15.75	10.69	6.08	7.73	6.72
comp100047_c0	23.94	40.64	36.61	60.05	71.61	57.19	54.46	58.68	50.72
comp100048_c0	6.13	4.36	6.12	8.79	7.72	7.68	9.47	8.79	9.1
comp100049_c0	5.83	6.18	5.09	5.33	4.44	5.59	6.75	6.13	6.08
comp100050_c0	6.18	8.13	7.25	22.04	25.8	24.81	23.67	23.61	25.83
comp100051_c0	2.52	4.13	3.29	4.43	4.46	3.5	5.21	4.29	5.87
comp100051_c1	1.04	1.44	1.45	2.78	2.24	1.42	2.15	3.09	2
comp100052_c0	0.15	3.34	4.83	4.85	5.83	21.94	1.06	5.17	6.95
comp100053_c0	23.84	22.55	19.12	22.59	21.99	24.7	24.88	31.28	21.87
comp100054_c0	105.89	79.85	103.22	96.15	83.49	96.38	79.53	88.36	81.59
comp100055_c0	24.91	46.58	37.61	44.14	63.93	35.07	40.86	46.79	35.6
comp100056_c0	8.49	11.74	10.48	9.26	7.43	5.52	5.89	4.79	10.83
comp100057_c0	4.77	3.76	2.05	1.79	2.61	5.98	2.31	2.79	3.03
comp100058_c0	0.41	1.49	0.21	1.03	0.95	1.94	1.73	0.89	0.99
comp100058_c1	0	0.57	0.85	0.7	1.31	0.67	1.09	0	0
comp100058_c2	0.48	0.95	1.15	0.63	0.37	0.85	1.28	0.39	0.91
comp100058_c3	11.93	11.09	10.43	15.84	11.96	14.11	18.19	23.53	19.75
comp100058_c4	3.79	2.15	2.04	1.54	1.22	2.03	3.9	2.87	2.81
comp100059_c0	1.52	1.13	2.73	3.12	4.32	2.66	2.23	2.05	3.37
comp100059_c1	0.16	0.51	1.53	0.81	2.65	2.04	0.18	0.55	0.2
comp100059_c2	1.32	0.82	1.92	0.98	1.92	0.75	0.69	1.14	0.96
comp100059_c4	0	0.26	0.86	0	0	0	0	0.26	0
comp100060_c0	9.64	8.5	8.93	20.01	18.61	17.45	21.45	18.39	19.03
comp100060_c1	7.01	5.1	4.43	6.28	7.9	5.73	5.38	7.87	7.44
comp100061_c0	7.37	19.22	4.53	26.17	11.29	54.88	12.52	38.78	75.19
comp100062_c0	34.92	28.1	24.43	31.26	26.65	33.14	41.78	41.68	35.81
comp100063_c0	0	0	0	0.51	0.81	0.24	0.24	1.26	1.91
comp100063_c1	29.05	46.7	60.63	71.91	106.2	68.39	80.66	81.18	76.07
comp100064_c0	122.26	168.38	133.09	87.22	105	181.52	134.62	130.89	133.22
comp100064_c1	1.29	2.32	1.75	0.7	0.42	0.65	1.24	0.41	0.42
comp100065_c0	9.29	9.78	14.96	5.52	5.5	6.09	3.57	5.02	3.43
comp100066_c0	14.67	6.47	10.58	9.62	4.32	8.06	7.26	8.41	9.61
comp100066_c1	3.12	3.22	5.39	6.53	5.05	4.73	1.93	2	2.89
comp100067_c0	18.24	21.82	15.41	17.36	12.87	17.26	25.99	21.05	25.44
comp100067_c1	36.61	31.86	22.44	26.84	23.48	33.22	39.08	39	32.38
comp100067_c2	31.3	25.92	23.18	26.12	20.58	23.29	31.08	25.25	32.34
comp100068_c0	0.65	4.29	2.58	29.94	8.87	23.12	5.4	9.25	11.37
comp100069_c0	581.06	371.43	534.8	514.91	457.07	614.16	481.51	479.57	499.95
comp100070_c1	110.05	84.63	82.34	81.5	92.86	96.77	98.45	98.31	94.02
comp100071_c0	40.32	22.41	19.28	43.51	22.13	47.09	43.42	46.13	40.3
comp100072_c0	7.2	4.93	5.5	6.58	4.4	4.81	5.97	6.65	5.68
comp100073_c0	1.17	1.9	2.11	2.75	1.1	0.93	2.48	1.89	2.15
comp100073_c1	2.76	2.64	2.31	2.67	2.4	2.99	3.32	2.58	2.99
comp100074_c0	6.62	6.85	6.51	5.37	5.61	7.86	8.58	9.4	9.16
comp100075_c0	12.08	9.65	12.63	15.53	15.52	16.57	11.22	10.57	12.1
comp100076_c0	67.2	73.28	71.76	62.1	52.74	180.08	79.84	78.47	102.56
comp100077_c0	0.18	0.96	0.18	0.4	0	0.56	0	1	0.85
comp100077_c1	22.45	28.54	33.41	22.28	26.58	19.36	26.13	25.38	26.94
comp100077_c2	0.63	1.32	0.59	1.36	0.89	1.5	2.26	1.24	1.64
comp100078_c0	283.65	165.36	209.55	167.66	83.27	291.64	196.09	184.07	218.76
comp100079_c1	75.37	80.79	45.02	69.64	46.92	77.66	89.67	80.63	78.95
comp10007_c0	0	0	0	0	0	0	0	0.27	0.36
comp100080_c0	7.07	4.96	6.26	9.44	11.92	9.21	12.78	15.54	14.98
comp100081_c0	30.28	26.42	31.86	31.04	27.25	35.15	32.69	30.28	35.05
comp100082_c0	0.37	0.04	0.52	4.78	2.72	2.45	3.08	1.9	2.32
comp100082_c1	0.54	0.06	0.4	3.5	3.1	3.67	3.34	3.65	2.23
comp100083_c0	8.03	9.45	6.41	5.94	6.57	6.71	7.89	6.69	6.46
comp100084_c0	8.14	6.54	8.03	8.64	4.49	7.78	12.36	11.62	10.97
comp100084_c1	83.89	92.56	80.62	91.57	83.26	110.05	108.85	103.03	106.52
comp100085_c0	14.41	16.58	12.57	6	9.53	9.28	17.75	16.63	15.4
comp100085_c2	20.05	22.22	23.67	19.66	25.25	22.31	26.11	23.71	29.2
comp100085_c3	1.77	3.39	1.28	2.52	2.67	1.48	2.23	2.4	1.1
comp100086_c0	1.65	1.28	1.86	0.81	1.35	0.41	1.4	0.85	1.15
comp100086_c1	1.46	1.64	0.81	0.63	0.96	0.73	2.35	1.41	1.96
comp100087_c0	2.63	2.63	2.68	2.11	1.93	3.01	2.66	2.8	4.6
comp100088_c0	5.45	4.61	3.77	3.52	2.91	3.28	4.64	3.93	3.87
comp100089_c0	1.45	0.51	1.03	0.63	0.41	0	2.37	2.06	1.63
comp100089_c1	7.02	6.86	5.78	5.97	3.53	5.88	7.54	6.4	8.87
comp100089_c2	2.22	2.13	3.13	2.17	2.46	3.13	1.59	2.58	1.93
comp100089_c3	3.13	5.06	1.74	3.33	2.15	6.06	4.71	4.65	4.85
comp100089_c4	1	0.57	0.51	0	0	0.4	0	0.12	0.3
comp100089_c5	0.76	1.77	0.94	0.34	0	0.43	0.38	0.25	0.87
comp100090_c0	206.14	201.98	203.99	196.98	175.01	178.99	230.49	210	238.46
comp100091_c0	21.64	20.05	19.33	36.44	34.24	30.37	34.35	34.65	29.43
comp100092_c0	6.84	7.08	5.98	9.61	9.64	8.95	11.41	10.6	12.45
comp100093_c0	0.66	0	0.34	0.56	0.45	0	0.7	0.31	0.4
comp100093_c1	73.69	97.42	87.05	73.41	109.43	86.37	52.68	58.32	47.39
comp100093_c2	1.15	2.1	0.67	0.92	1.2	1.22	0	0.47	0.4
comp100093_c3	0	0	0	1.45	1.15	0	0	0.71	0
comp100093_c4	0.67	0.15	0.17	0	0.31	0	0.53	0	0
comp100094_c0	0.92	0	0	0	0	0	0	0	0
comp100094_c1	6.06	7.17	5.04	7.94	6.07	7.74	8.86	9.52	7.15
comp100095_c0	132.92	101.78	107.59	145.68	101.44	121.89	131.46	143.8	125.31
comp100096_c0	1.18	0.52	0.68	0.16	0.13	0.9	0.98	1.31	0.86
comp100096_c1	187.54	208.9	148.25	142.09	127.14	162.09	195.72	175.07	193.09
comp100097_c0	19.61	19.07	15.89	19.99	15.27	14.97	22.67	20.52	23.82
comp100098_c0	9.28	8.96	12.35	15.4	12.56	16.06	19.23	18.42	17.32
comp100099_c0	27.83	25.01	21.94	25.21	18.58	25.81	28.98	29.11	29.33
comp100100_c0	13.02	10.88	12.09	4.87	7.12	6.91	7.33	7.18	8.13
comp100101_c0	6.35	6.51	4.07	3.43	4.83	5.32	3.55	4.76	3.48
comp100101_c2	4.47	3.64	4.41	2.39	4.47	1.93	3.51	3.79	2.98
comp100101_c3	3.92	3.98	2.39	4.17	4.72	6.85	6.95	5.94	5.55
comp100101_c5	1.17	0.94	1.05	0.83	0.27	0.94	0.16	1.55	0.89
comp100102_c0	131.62	159.99	193.29	160.28	256.88	170.9	133.61	167.95	146.16
comp100103_c0	15.38	14.44	14.06	21.59	13.23	22.2	16.61	17.14	18.36
comp100104_c0	3.51	1.58	2.9	1.3	1.76	3	1.77	4.49	1.06
comp100104_c1	2.32	2.18	1.77	1.06	1.21	1.88	2.22	2.41	2.83
comp100104_c2	1.54	0.59	0.28	0.62	0.08	0.77	0.68	0.98	0.78
comp100105_c0	18.81	17.86	19.99	23.93	20.17	18.94	18.04	22.96	17.42
comp100106_c0	32.93	37.3	29.53	44.57	40.48	40.23	37.61	40.93	32.63
comp100107_c0	0.29	0.07	0	4.29	3.23	2.04	2.13	1.42	2.49
comp100108_c0	10.78	3.28	4.93	2.85	3.56	5.66	9.2	7.71	9.67
comp100109_c0	1.47	1.16	1.18	1.91	1.71	6.98	2.12	2.58	3.32
comp100110_c0	6.81	9.61	8.33	7.42	6.13	6.7	10.74	7.41	8.27
comp100111_c0	4.37	3.04	2.83	7.48	4.22	12.63	8.53	8.37	6.39
comp100112_c0	51.63	48.52	38.07	46.72	34.3	50.74	55.38	53.97	55.63
comp100113_c0	24.31	24.37	19.05	20.19	20.27	21.58	31.25	31.71	32.22
comp100113_c1	8.59	10.06	7.75	5.13	9.72	6.64	8.12	9.8	6.49
comp100113_c2	1.03	0	0	0	0	0	0	0.77	0
comp100114_c0	0.96	1.78	1.62	1.23	0.4	3.19	1.61	1.99	1.69
comp100114_c1	72.71	128.78	99.78	240.02	213.97	235.71	222.85	247.43	210.84
comp100115_c0	7.84	7.39	9.33	5.01	4.57	3.73	3.13	4.57	5.98
comp100116_c0	28.02	10.65	21.04	6.8	5.55	14.12	11.01	8.29	11.15
comp100117_c0	0	0.33	0.12	0	0.77	0.38	1.01	0.35	0.87
comp100117_c1	4.37	2.87	3.08	6.24	5.33	7.19	8.37	10.46	7.87
comp100118_c0	1.16	1.07	0.89	1.21	1.81	1.96	3.62	2.85	2.25
comp100118_c1	9.87	11.78	7.94	11.74	15.41	15.63	16.7	14.87	12.43
comp100118_c2	0.38	0.53	0.39	0.44	0.36	1.12	0.92	0.47	0.12
comp100119_c0	15.1	14.59	11.56	13.31	7.99	13.29	17.17	14.48	17.58
comp100120_c0	8.01	8.06	5.86	8.49	7.64	10.67	10.21	8.96	10.13
comp100121_c0	2.75	3.07	1.75	2.37	2.3	3.63	3.34	3.91	2.96
comp100122_c1	0.17	0.31	0.52	0	0.46	0	0.18	0.16	0
comp100122_c2	374.98	300.37	327.05	369.11	362.33	364.74	435.05	421.06	412.21
comp100123_c0	7.94	8.22	13.79	5.14	9.96	6.21	4.23	6.52	5.35
comp100124_c0	4.72	5.08	4.74	6.24	3.2	7.34	10.4	9.7	11.89
comp100124_c1	5.35	3.06	2.85	4.65	2.42	4.44	7.04	5.22	7.02
comp100125_c0	8.61	8.64	6.78	10.2	7.82	9.82	12.74	12.55	13.88
comp100125_c1	1.34	1.23	1.03	1.64	1.96	1.18	1.54	2.5	0
comp100125_c2	0.76	0.85	0.87	1.82	1.58	0.98	1.71	1.25	2.06
comp100126_c0	11.21	13.43	13.5	13.58	14.04	10.37	12.75	15.94	12.22
comp100127_c0	63.54	35.68	34.35	27.89	20.55	23.97	29.65	27.65	23.72
comp100128_c0	20.03	20.48	19.97	40.37	36.43	43.65	35.11	39.79	41.68
comp100129_c0	1.27	1.06	2.61	3.06	4.27	3.73	1.35	3.33	1.99
comp100129_c1	92.22	99.26	73.2	49.66	51.63	52.22	57.26	55.55	54.25
comp100129_c2	0	0.41	1.37	0	0	0	0	1.05	0
comp100129_c3	69.37	77.52	47.99	27.06	28.02	36.83	42.11	35.6	33.71
comp100130_c0	57.55	74.46	82.49	20.58	25.38	19.7	21.38	18.57	20.14
comp100131_c0	27.21	20.79	34.74	15.22	13.23	13.02	22.01	22.73	22.06
comp100132_c0	16.31	12.28	11.06	8.94	7.99	12.6	11.12	8.78	8.42
comp100132_c1	22.72	19.05	12.83	15.9	11.89	16.2	14.35	13.68	12.79
comp100133_c0	50.07	36.01	38.51	25.19	21.15	24.17	34.78	29.04	30.45
comp100134_c0	498.79	329.74	285.58	356.79	304.77	429.96	455.1	413.96	431.63
comp100135_c0	117.14	112.33	194.26	88.49	90.24	82.66	79.4	61.56	61.28
comp100136_c0	18	23.26	17.49	25.39	19.91	23.58	28.3	23.59	26.59
comp100137_c0	282.36	20.92	13.31	16.98	7.89	11.78	7.14	2.48	3.73
comp100138_c0	4.01	5.01	4.99	4.37	2.85	3.92	5.85	5.65	7.44
comp100139_c0	5.98	7.31	8.84	21.99	24.08	23.21	23.55	21.57	24.55
comp100140_c0	8.47	7.72	9.85	9.43	9.47	9.88	9.56	8.91	9.95
comp100141_c0	5.21	5.9	6.07	7.75	7.24	9.01	9.67	6.87	9.92
comp100141_c1	3.3	4.29	2.93	2.72	3.31	3.86	4.14	5.26	5.27
comp100141_c2	0	0	1.57	0.19	0.94	0.73	0	0	0
comp100142_c0	58.49	33.34	34.33	47.55	29.67	32.15	51.41	46.55	46.35
comp100143_c0	0	0	0.2	0.22	0.54	0	0.42	0	0.72
comp100143_c1	2.32	0	0.9	4.6	1.31	2.26	0.97	2.4	3.27
comp100143_c2	4.42	3.39	5.85	7.77	6.58	6.66	7.31	6.34	7.47
comp100144_c0	6.06	10.03	8.04	0.79	0.67	1.11	1.3	0.53	0.59
comp100145_c0	25.07	17.83	13.02	0.18	0.61	0.4	0.95	0.13	0.1
comp100146_c0	14.07	10.76	11.09	4.14	5.62	6.12	4.89	5.19	5.29
comp100147_c1	12.47	17.61	15.77	23.61	22.36	21.31	20.51	21.72	23.9
comp100148_c0	5.37	6.8	7.59	5.85	6.99	6.16	8.33	6.99	6.52
comp100149_c0	1.06	1.64	0.69	1.97	2.11	1.32	1.29	1.38	1.91
comp100149_c1	1.11	2.37	1.54	2.46	2.78	4.02	2.99	4.42	3.65
comp100149_c2	0	0.33	1.73	0.54	1.56	1.28	0.9	1.29	2.64
comp100150_c0	24.1	29.18	20.83	33.18	28.47	40.45	37.37	35.23	37.53
comp100151_c0	30.14	21.64	30.96	20.65	21.33	21.27	23.35	23.08	22.02
comp100152_c0	7.72	7.86	9.82	8.44	8.62	9.31	9.76	11.06	10.65
comp100153_c0	18.05	17.27	16.08	16.21	15.07	18.02	19.85	22.9	23.4
comp100154_c0	22.47	16.17	18.4	12.52	10.51	11.24	13.2	15.17	15.21
comp100155_c0	8.15	8.79	7.6	7.56	8.32	8.07	9.23	9.63	10.27
comp100156_c0	28	36.01	26.1	26.99	41.34	17.84	24.78	25.7	22.26
comp100157_c0	6.61	4.39	5.89	7.12	7.43	8.84	12.42	10.24	9.55
comp100158_c0	6.9	8.61	5.96	4.73	4.86	3.9	8.93	9.95	12.34
comp100159_c0	11.51	9.46	9.86	7.45	7.36	7.09	9.32	8.6	6.94
comp100160_c0	46.51	48.83	44.51	44.01	61.47	53.67	60.93	60.6	63.32
comp100161_c0	1.33	2.43	3.33	2.16	2.7	2.72	0.44	2.87	1.72
comp100161_c1	16.16	14.48	14.77	12.13	13.27	12.72	14.46	14.93	15.65
comp100162_c0	4.68	9.63	10.01	6.57	16.46	6.39	7.66	12.76	15.47
comp100163_c0	8.95	0.92	3	0.2	1.04	1.24	2.71	0.32	0.69
comp100164_c0	39.87	47.58	36.29	33.13	33.88	42.57	42	44.32	44.32
comp100165_c0	2.09	1.88	1.77	1.95	2.05	3.14	2.08	2.35	2.93
comp100166_c0	12.65	13.59	16.15	45.09	9.08	33.33	27.18	34.83	36.71
comp100167_c0	1.06	1.03	1.1	0.48	1.37	0.4	2.74	2.3	2.05
comp100168_c0	11.72	8.44	13.98	5.8	6.11	5.72	6.81	6.32	6.28
comp100169_c0	23.14	23.99	17.76	24.21	20.34	25.38	32.35	28.82	27.96
comp100170_c0	13.51	12.22	16.38	18.46	21.11	17.67	26.32	23.66	26.02
comp100171_c0	14.33	20.23	18.47	15.11	16.27	24.84	15.05	20.03	14.93
comp100171_c1	12.97	10.81	7.89	3.83	3.5	9.19	9.42	9.17	13.16
comp100172_c0	32.84	30.01	40.4	15.41	23.25	22.62	14	12.74	8.79
comp100173_c0	0.31	0	0.32	0.17	0.57	0.82	0.49	0.59	0
comp100173_c1	32.79	23.37	26.3	33.89	22.91	39.3	37.28	37.66	34.37
comp100174_c0	372.61	270.41	286.59	330.17	279.67	283.74	363.78	372.27	355.11
comp100175_c0	5.09	2.31	3.84	4.86	3.66	4.85	4.9	4	7.01
comp100176_c0	13.14	11.53	15.58	14.67	14.16	12.49	13.94	14.21	13.1
comp100177_c0	50.89	55.71	48.36	46.9	45.56	49.09	69.34	67.97	70.14
comp100177_c1	0	0	1.53	0.56	0.22	0	0	0.23	0
comp100177_c2	2.47	1.4	3.7	1.18	1.59	1.71	1.22	2.8	2.32
comp100178_c0	9.39	9.92	8.46	6.04	7.39	7.39	11.52	13.32	8.6
comp100179_c0	31.56	25.53	26.99	40.38	37.25	43.2	40.69	43.33	46.21
comp100180_c0	19.13	21.01	14.98	22.56	17.25	25.4	23.04	18.33	21.64
comp100181_c0	11.66	13.02	12.72	2.68	8.03	5.79	3.07	3.81	4.87
comp100182_c0	18.34	21.58	12.42	19.22	13.38	18.74	20.13	20.36	25.83
comp100183_c0	17.62	15.11	12.25	16.88	11.49	15.25	17.34	19.79	16.57
comp100184_c0	18.28	18.65	12.72	20.19	15.11	20.63	22.35	22.94	21.32
comp100185_c0	6.91	8.94	8.58	5.6	5.13	5.8	8.89	7.67	9.88
comp100186_c0	21.11	25.49	32.21	30.51	44.44	31.92	19.85	19.59	13.21
comp100187_c0	3.57	3.5	5.59	5.38	5.13	5.58	3.16	3.38	4.55
comp100188_c0	32.04	25.99	26.51	45.21	36.95	44.84	52.11	50.64	54.89
comp100189_c0	11.37	2.21	2.71	3.1	1.43	3.68	6.51	5.22	4.21
comp100190_c0	1.93	3.62	3.58	11.28	15.94	9.92	12	11.19	9.38
comp100191_c0	0	0	0	0.8	0	0.25	0.5	1.76	0.57
comp100191_c1	15.01	17.85	13.59	20.33	11.61	15.07	24.53	27.83	27.83
comp100191_c2	1.33	1.22	0.75	4.33	5.55	4.86	3.9	5.8	2.86
comp100192_c1	3.97	8.18	3.78	3.61	4.18	4.74	3.42	3.64	3.95
comp100193_c0	40.83	38.97	36.6	18.39	25.05	23.78	40.7	34.42	35.97
comp100193_c1	0.78	2.51	1.79	0.22	1.24	0.63	3.49	0.55	0.95
comp100194_c0	42.73	38.09	47.13	29.74	32	40.75	37.05	36.24	39.35
comp100195_c0	4.95	4.94	9.62	7.16	5.65	7.16	5.29	4.4	4.78
comp100196_c1	6.89	6.13	5.15	6.95	6.27	8.54	10.22	10.19	11.32
comp100197_c0	4.54	4.62	4.92	9.36	5.38	10.24	5.46	6.27	7.27
comp100198_c0	10.83	4.64	15.57	7.84	4.9	5.13	6.41	6.07	4.69
comp100199_c0	5.87	7.42	6.76	2.77	3.62	6.5	4.81	2.85	5.36
comp100199_c1	37.85	40.84	36.18	32.41	31.32	41.13	40.65	33.19	42.4
comp100200_c0	50.09	40.76	37.88	51.62	43.28	66.79	62.9	60.34	57.48
comp100201_c0	19.23	21.1	16.65	29.13	19.5	25.83	39.46	31.57	39.11
comp100202_c0	19.85	23.23	26.61	9.03	10.1	7.69	6.26	6.59	5.01
comp100203_c0	0	0	0	0	0	0	1.06	0	0
comp100203_c2	21.19	23.6	19.03	18.94	15.86	18.57	26.36	25.87	23.87
comp100204_c0	33.26	29.15	23.03	34.69	22.31	34.58	44.15	39.83	42.93
comp100204_c1	0	0.3	0.33	0	0	0.7	0	0.87	0
comp100205_c0	10.36	9.86	7.41	16.09	13.11	14.24	13.64	13.87	15.28
comp100206_c0	23.86	19.66	20.21	24.3	20.91	26.19	27.22	25.96	29.39
comp100207_c1	59.77	45.35	48.19	33.36	29.84	38.64	34.56	35.54	40.07
comp100208_c0	11.42	39.62	94.92	248.56	320.96	67.07	195.75	176.78	124.26
comp100209_c0	20.42	13.54	16.85	19.31	16.39	18.18	13.98	17.72	15.23
comp100210_c0	2.15	1.7	2.39	4.19	3.17	4.58	3.93	4.94	4.57
comp100211_c0	444.67	451.34	533.28	418.07	737.04	429.56	398.79	450.86	441.73
comp100212_c0	19.39	19.06	17.81	23.74	19.36	26.4	19.96	22.88	21.87
comp100213_c0	36.92	37.07	35.88	51.14	40.68	39.63	41.5	41.55	39.97
comp100214_c0	10.78	16.11	10.32	11.63	10.1	9.93	12	10.16	9.12
comp100215_c0	20.4	21.01	15.6	14.91	14.65	22.27	24.35	23.07	25.04
comp100216_c0	75.7	42.84	44.09	42.25	28.45	36.73	44.71	36.32	32.99
comp100217_c0	4.72	3.77	2.34	1.97	0.76	1.59	3.45	2.43	3.16
comp100217_c1	0.86	0.56	0.72	1.37	1.45	0.97	1.04	1.39	0.89
comp100217_c2	0.17	0.76	0.34	1.13	0.61	1.24	0	0	0.81
comp100217_c4	0.6	0.56	0.41	1.45	0.44	0.43	0.58	1.4	0.98
comp100217_c5	27.11	17.05	18.47	15.47	11.81	14.46	17.06	14.71	18.19
comp100217_c6	0	0.8	0	0.2	0.16	0	0.55	0.33	0
comp100218_c0	3.4	2.33	7.1	6.4	1.75	7.61	7.53	6.36	6.98
comp100219_c0	69.91	57.94	44.89	82.21	83.63	99.23	74.62	88.05	84.1
comp100220_c0	1.88	1.84	3.77	1.02	3.06	1.15	0.65	1.67	1.29
comp100221_c0	5.9	3.87	7.41	5.4	4.69	5.9	6.92	6.01	5.97
comp100222_c0	0.18	1.16	0.37	0.61	0.16	1.54	1.72	0.86	1.98
comp100222_c1	1.41	0.94	0.66	1.01	0.83	0.41	0.27	0.5	0
comp100222_c2	1.4	1.58	1.68	0.62	0.88	1.08	2.58	2.31	1.9
comp100222_c3	3.11	1.93	1.2	1.96	1.16	1.68	2.28	2.03	2.37
comp100222_c4	0.63	0.97	0.98	1.68	0.59	0.56	2.03	1.03	1.68
comp100222_c5	0.78	0.43	1.28	0	2.15	0.5	0.83	0.9	0
comp100222_c8	5.17	5.35	3.87	4.01	3.55	4.89	7.4	5.74	5.03
comp100223_c0	13.28	8.8	12.19	9.74	10.26	11.29	9.81	10.14	9.45
comp100224_c0	6.87	7.88	5.51	8.5	7.6	6.32	12.75	11.62	10.05
comp100224_c1	0	0	0	0	0.48	0	2.25	0	0
comp100225_c0	5.37	5.32	4.8	3.74	3.17	3	7.37	5.47	4.75
comp100226_c0	1.16	2.04	1.86	0.8	0.61	0.19	1.63	2.79	1.71
comp100226_c1	1.52	2.29	1.11	1.35	1.41	1.84	3	2.22	1.98
comp100226_c2	24.61	20.1	25.38	21.43	24.36	23.73	30.96	31.61	28.87
comp100226_c3	0.9	1.43	0.51	2.03	1.08	1.95	1.74	0.63	1.79
comp100226_c4	0	0.27	0	0	0	0	0	0	0
comp100227_c0	46.97	46.12	45.3	68.62	61.45	82.65	91.37	85.8	91.58
comp100228_c0	0.67	0.24	0.39	3.05	3.21	2.75	0	0.53	0.47
comp100228_c1	7.32	11.53	9.48	12.89	15.85	15.88	11.38	9.45	9.71
comp100229_c0	8.16	7.88	7.94	4.23	3.34	5.11	8.44	9.68	11.42
comp100229_c1	2.71	3.25	3.18	3.09	2.4	4.35	2.94	3.16	3.82
comp100229_c2	0.44	0	0.51	0	0.79	0.3	1.17	0.21	0
comp100230_c0	0	0	0	3.91	3.45	3.19	1.96	1.02	2.33
comp100230_c2	53.62	29.88	23.07	46.14	27.48	44.18	51.34	43.77	54.76
comp100230_c4	6.16	2.93	1.95	5.25	1.79	3.6	2.99	3.28	3.13
comp100230_c5	35.45	19.28	35.58	38.75	34.58	56.91	42.17	33.39	42.98
comp100231_c0	6.74	6.35	6.63	3.97	5.87	6.38	6.51	5.61	4.99
comp100231_c1	0	0.43	1.27	0.7	0.86	1.49	0	0	0
comp100231_c2	0	0.18	0	0.65	0.35	0	0.81	0.18	0
comp100232_c0	19.33	22.23	34.81	27.53	37.19	42.29	38.62	33.85	44.2
comp100233_c0	320.16	415.79	370.7	512.54	624.66	476.56	407.95	461.82	406.96
comp100234_c0	142.68	190.28	127.92	103.98	135.6	68.63	151.44	148.36	132.87
comp100235_c0	4.52	4.99	4.29	4.32	3.19	3.6	4.84	3.77	4.4
comp100236_c0	9.21	9.28	10.07	9.15	6.15	9.29	12.11	10.46	12.44
comp100237_c0	71.29	77.84	68.87	55.54	65.47	73.39	86.89	73.95	73.46
comp100237_c1	8.68	11.72	6.55	3.83	2.55	4.1	14.38	11.8	13.97
comp100237_c2	2.31	2.4	1.57	2.43	3.38	3.43	2.11	2.65	3.36
comp100238_c0	52.52	16.88	19.75	30.36	15.37	38.11	32.81	31.07	35.63
comp100239_c0	4.28	6.22	4.09	5.45	5.61	4.66	11.74	9.5	10.19
comp100240_c0	35.64	26.42	23.71	27.57	18.92	25.84	25.84	28.28	26.77
comp100241_c0	1.81	0.78	0.37	0.41	0.34	1.29	0	0.35	0.88
comp100241_c1	2.22	1.82	1.46	1.5	0.78	2.45	2.74	2.07	1.1
comp100241_c2	217.61	102.43	69.95	32.35	25.33	38.71	69.3	54.1	62.92
comp100242_c0	2.53	2.31	3.63	6.19	2.48	8.81	1.46	2.52	3.15
comp100242_c1	2.58	1.82	3.42	5.44	2.29	5.86	0.73	1.89	1.99
comp100243_c0	116.37	146.56	139.12	149.41	153.18	142.39	118.53	129.61	107.52
comp100244_c1	0.68	0.21	0	0	0	0.24	0	0	1.65
comp100244_c2	38.85	39.41	36	40.11	35.21	35.01	28.8	25.02	31.26
comp100244_c3	73.15	70.83	52.26	64.01	47.25	75.62	58.68	59.46	57.71
comp100245_c0	70.24	49.46	67.02	62.21	58.07	52.41	59.11	58	44.74
comp100246_c0	124.13	100.46	167.84	104.69	107.75	105.38	119.5	128.58	118.24
comp100247_c0	13.89	16.83	12.77	12.87	11.94	15.07	21.18	20.14	19.63
comp100248_c0	41.68	27.22	42.1	30.48	31.75	33.59	37.5	38.74	34.33
comp100249_c0	100.23	95.13	68.18	83.23	61.48	92.76	97.77	92.23	100.17
comp100250_c0	8.89	10.19	10.36	8.48	7.42	8.84	6.77	6.33	8.85
comp100251_c0	0.17	0	0.09	1.14	0.31	1.6	0	0.08	0
comp100251_c1	5.87	6.09	5.51	5.95	5.19	6.52	5.44	4.05	6.91
comp100252_c0	3.4	3.9	4.06	3.43	3.69	3.74	4.97	4.78	4.39
comp100253_c0	217.98	263.04	277.51	281.45	321.94	319.94	294.41	270.27	297.14
comp100253_c1	2.43	1.72	4.12	3.43	3.93	2.75	2.42	3.85	3.01
comp100254_c0	2.76	4.31	3.59	7.2	5.79	7.85	7.76	6.85	7.76
comp100255_c0	12.74	12.71	19.76	34.7	40.42	28.87	23.19	28.68	24.31
comp100255_c1	4.9	7.85	7.07	20.64	10.97	15.32	6.53	12.11	11.68
comp100256_c0	18.33	26.55	29.47	48.34	58.45	44.51	70.1	65.41	78.11
comp100257_c0	44.37	37.56	28.36	92.34	37.19	87.49	33.52	30.36	29.82
comp100258_c0	11.32	9.94	13.2	13.31	15.66	12.72	11.7	14.29	12.52
comp100259_c0	3.1	2.4	5.47	6.11	5.57	5.67	3.37	4.11	5.06
comp100260_c0	7.28	8.94	6.53	3.83	6.36	4.18	5.23	3.59	5.15
comp100261_c0	6.14	5.63	5.8	11.62	10.49	13.71	13.17	13.04	12.28
comp100262_c0	27.28	19.87	28.63	34.08	32.73	27.81	32.94	40.67	29.73
comp100263_c0	54.26	190.93	120.03	123.23	225.95	120.13	98.65	122.19	123.78
comp100264_c2	8.67	8.88	7.86	8.45	8.95	9.13	13.84	13.44	12.62
comp100264_c3	15.08	16.15	11.86	14.79	11.16	15.95	13.43	17.99	16.44
comp100265_c0	15.49	10.42	6.31	9.29	7.01	9.89	9.68	10.97	10.82
comp100266_c0	4.72	6.7	5.65	2.34	3.32	4.19	2.62	2.23	3.6
comp100267_c0	34.25	37.01	27.07	24.59	26.83	29.03	37.72	33.18	38.96
comp100268_c0	1132.1	1907.03	1580.33	1409.96	2126.88	1057.12	1136.26	1526.33	1163.02
comp100268_c1	5729.96	10521	9604.1	7564.42	10058.7	5252.75	5166.01	6212.91	6068.02
comp100269_c0	17.73	4.93	16.18	14.57	8.9	8.93	16.7	10.89	8.03
comp100269_c1	33.78	42.36	48.04	28.01	50.6	30.54	35	32.76	32.76
comp100269_c2	0	0	1.03	0	0.23	0	0	0	0
comp100270_c0	0.52	1.5	0.27	0.66	0.12	0.14	0.14	0.13	0.16
comp100270_c1	12.61	10.03	10.99	11.45	9.89	10.54	9.73	11.18	12
comp100271_c1	1.61	1.81	1.49	1.56	1.41	1.63	2.21	1.77	2.45
comp100271_c3	0.62	0.43	0.16	0	0.29	0.33	1.32	0.45	0.95
comp100272_c0	8.29	5.92	5.56	11.14	7.56	13.17	13.14	14	15.69
comp100273_c0	2258.51	2590.17	2667.96	2662.29	2848.72	1955.73	1698.95	2198.25	1840.95
comp100274_c0	34.52	26.21	30.56	44.04	34.36	34.89	54.85	50.7	56.95
comp100274_c1	4.31	3.66	5.55	7.38	6.36	9.18	12.01	8.86	7.95
comp100275_c0	24.69	16.79	17.04	14.35	15.73	18.86	23.11	16.76	16.41
comp100276_c0	25.86	32.42	25.3	54.93	44.43	51.32	61.65	61.7	66.13
comp100277_c0	66.4	50.12	54.37	98.16	74.31	96.61	102.88	111.41	118.29
comp100278_c0	6.28	2.19	2.41	3.79	1.69	6.43	7.62	4.21	8.45
comp100279_c0	10.19	11.32	8.84	11	8.63	11.52	14.25	13.13	12.75
comp100280_c0	5.36	3.34	4.06	5.32	3.65	5.19	3.36	6.56	5.55
comp100281_c0	5.29	3.9	4.3	4.66	4.7	5	6.89	6.03	5.74
comp100281_c1	7.71	11.92	11.29	11.29	10.18	11.02	12.57	14.47	12.1
comp100282_c0	58.57	58.2	57.22	56.56	59.16	57.62	72.02	62.18	70.61
comp100283_c0	3.11	5.19	3.05	4.34	3	5.51	4.44	3.96	4.25
comp100284_c0	5.08	4.39	4.18	2.6	3.39	5.52	6.27	3.09	4.57
comp100285_c0	13.35	9.57	10.16	12.85	12.22	13.23	16.56	13.64	14.2
comp100286_c0	0.6	3.29	1.53	2.02	2.19	3.82	3.95	1.72	1.63
comp100286_c2	12.26	9.53	6.94	14.85	7.38	20.84	15.08	15.75	18.49
comp100287_c0	1.66	0.77	0.84	0.85	1	1.27	1.84	1.41	3.09
comp100287_c1	75.99	50.55	46.89	57.32	41.17	61.73	66.93	66.76	62.63
comp100288_c0	24.98	19.82	19.9	26.87	18.28	23.83	27.49	24.59	28.04
comp100289_c0	9.64	5.1	6.37	6	3.99	4.77	4.49	4.4	4.59
comp100290_c0	3.41	3.73	4	3.09	3.16	3.55	4.28	4.3	3.62
comp100291_c0	0.69	0.72	1.09	2.37	1.42	2.12	0.65	0.43	0.58
comp100291_c1	1.29	1.78	2.18	17.68	20.78	20.62	5.06	4.36	4.26
comp100292_c0	0	0	0.2	1.79	0.18	0.21	0	0.37	0
comp100292_c1	7.49	4.28	6.09	12.16	12.74	8.97	5.26	3.79	5.53
comp100292_c2	1.23	0.38	0.92	1.71	1.1	0.87	0.15	0.2	0
comp100292_c3	2.31	0.65	0.29	1.75	1.39	0.52	0.6	0.49	0.43
comp100292_c4	0.38	0.35	0.39	1	0.13	0.67	0.72	0.12	0
comp100293_c0	0.84	1.41	1.86	0.63	0.64	1.19	0.89	0.13	0.85
comp100293_c1	7.6	3.5	6.32	6.06	4.01	9.22	5.4	6.52	6.91
comp100294_c0	27.57	27.69	28.3	22.17	17.18	30.52	25.47	24	24.04
comp100295_c0	7.73	8.38	9.26	3.15	3.35	11.28	6.3	5.32	5.03
comp100296_c0	22.2	15.45	14.79	16.16	15.41	20.02	19.95	19.66	15.48
comp100297_c0	0.42	3.57	2.19	25.12	6.62	21.31	3.5	8.06	9.38
comp100298_c0	217.23	219.46	201.55	189.9	175.64	211.65	187.18	191.73	199.87
comp100299_c0	0.57	0.35	0	0.43	0	0.2	1.41	0.36	2.08
comp100299_c1	6.25	11.73	7.78	10.91	8.66	8.69	9.72	14.07	11.64
comp1002_c0	1.02	1.17	0.44	0	0.16	0.54	0.45	0	0.41
comp100300_c0	2.51	2.03	4.14	2.92	3.59	3.45	6.5	4.43	2.07
comp100301_c0	176.28	199.49	153.9	170.17	133.64	175.32	147.28	148.49	138.91
comp100302_c1	68.34	84.06	72.02	64.3	63.95	58.54	120.16	97.36	105.22
comp100302_c2	6.47	4.06	8	2.72	2.91	2.36	4.66	5.3	11.22
comp100302_c3	1.31	0.89	1	0.16	1.43	0.37	1.85	2.26	2.28
comp100303_c0	5.3	2.11	4.48	3.52	11.24	5.35	1.5	0.76	0.76
comp100304_c0	11.02	11.52	9.45	17.6	14.88	15.88	17.08	15.12	15.34
comp100305_c0	125.15	111.35	95.29	109.62	86.43	100.58	123.19	108.49	107.36
comp100306_c0	9.96	11.31	9.95	12.77	11.78	12.56	10.01	11.75	8.75
comp100307_c0	72.19	73.79	67.46	53.72	48.51	53.18	75.78	69.28	77.32
comp100308_c0	12.74	11.81	10.99	7.32	10.1	7.5	8.71	8.64	11.5
comp100308_c1	9.59	6.59	11.37	2.23	2.44	2.23	0.93	2.89	2.45
comp100308_c2	7.89	8.02	6.67	5.95	4.53	5.04	6.49	4.82	7.68
comp100309_c0	8.83	12.44	11.04	15.18	13.13	19.15	16.46	16.94	16.83
comp100310_c0	42.24	31.71	35.29	33.91	36.62	32.46	32.06	34.55	32.19
comp100311_c0	14.1	14.22	11.38	11.75	11.75	13.18	12.43	14.67	13.9
comp100312_c0	144.74	173.06	190.8	107.18	147.04	129.7	133.71	143.98	128.5
comp100313_c0	4.33	3.7	5.09	5.98	7.09	8.18	8.39	10.95	10.78
comp100314_c0	1733.14	3633.8	3853.18	2303.56	3342.58	1474.35	1215.16	1669.44	1481.59
comp100314_c1	710.04	1647.59	1856.95	801.54	1560.66	689.35	525.51	645.73	626.59
comp100315_c0	19.07	13.29	7.92	10.31	7.81	11.68	13.28	13.96	14.34
comp100316_c0	5.4	4.78	2.19	2.56	1.26	3.15	3.86	2.9	3.69
comp100317_c0	27.14	28.19	28.42	44.57	51.11	42.41	42.19	42.96	45.26
comp100318_c0	19.84	18.25	20.51	26.9	27.33	27.25	33.87	36.93	30.26
comp100319_c0	5.34	4.38	4.29	6.3	9.64	7.19	7.07	5.81	5.4
comp100320_c0	11.57	11.36	11.94	9.54	9.48	11.14	10.38	11.1	9.68
comp100320_c1	1.1	0.67	1.68	1.65	1.18	1.56	2.32	1.63	2.44
comp100321_c0	49.24	62.52	65	23.21	16.35	44.18	35.09	36.51	30.32
comp100322_c0	11.09	10.3	9.41	8.44	7.24	16.5	19.94	19.62	26.21
comp100323_c0	0	0	0	0.47	0.19	0	0.65	0	0.75
comp100323_c1	4.09	4.72	4	5.89	5.92	6.16	6.53	8.34	6.12
comp100324_c0	7.46	5.89	11.25	4.95	4.88	5.97	6.57	6.54	8.3
comp100325_c0	0	0	0.8	0	0	0	0	0	0
comp100325_c1	13.36	13.63	18.11	23.53	15.92	26.41	16.32	23.82	21.26
comp100326_c0	93.46	70.35	54.17	87.7	59.95	80.24	101.52	102.95	92.38
comp100327_c0	214.72	126.78	231.29	107.98	78.94	161.53	77.59	101.75	103.96
comp100328_c0	8.79	8.31	6.33	6.36	8.36	8.63	13.15	13.98	15.58
comp100329_c0	13.15	11.81	15.87	18.77	14.42	21.92	21	21.77	23
comp100330_c0	3.62	4.61	3.13	2.84	3.28	2.46	2.48	1.98	3.15
comp100331_c0	2.13	2.5	5.28	5.15	3.2	6.55	3.3	2.66	3.16
comp100332_c0	78.04	60.8	74.79	131.65	102.37	114.71	178.18	176.48	172.6
comp100333_c2	7.04	7.22	3.87	4.07	5.65	4.25	4.01	5.6	5.84
comp100334_c0	1.45	0.31	0.61	0.58	0.64	1.18	0.91	1.01	0.62
comp100334_c2	4.31	2.75	1.97	2.18	1.49	2.26	3.49	3.48	2.54
comp100335_c0	1.25	0.58	0.9	1.13	0	0.93	0	0.97	0
comp100335_c1	2.54	2.01	2.52	2.81	3.37	3.29	3.17	3.03	1.68
comp100336_c0	5.48	4.72	5.82	7.11	9.15	6.03	8.01	8.09	7.22
comp100337_c0	65.93	103.24	118.24	242.05	323.62	231.2	170.5	223.25	212.32
comp100338_c0	0.23	0	0	0	0.2	1.21	0.24	0.21	0
comp100338_c1	21.84	25.73	16.75	19.89	18.44	24.55	20.27	30.51	26.97
comp100339_c0	8.77	13.63	16.01	39.65	51.6	30.48	26.43	30.55	24.58
comp100340_c0	3	1.88	1.38	2.29	2.31	2.81	2.33	2.23	2.98
comp100341_c0	33.75	48.45	42.13	20.94	26.81	22.14	20.31	20.02	21.51
comp100342_c0	3.56	2.57	2.61	5.53	2.66	6.8	4.73	3.95	5.67
comp100343_c0	13.89	20.83	14.33	8.26	17.73	13.34	24.95	27.18	26.62
comp100344_c0	3.96	6.04	4.78	3.19	4.1	5.9	5.42	5.76	6.3
comp100345_c0	4.48	6.2	5.99	4.85	7.19	3.77	3.61	6.85	4.68
comp100345_c1	0.86	1.18	0.44	0.24	0	0	1.13	1.2	1.04
comp100346_c0	9.96	8.37	10.41	3.63	3.58	5.05	4.65	3.44	3.77
comp100347_c0	5.33	5.04	3.79	5.2	4.33	6.01	7.16	7.79	7.09
comp100348_c0	3.16	3.44	2.5	3.08	2.19	3.79	4.12	3.05	3.68
comp100349_c0	12.56	13.89	13.89	11.71	12.42	11.48	11.24	10.98	11.13
comp100350_c0	156.99	92.47	85.01	34.86	32.26	15.64	43.37	41.69	26.08
comp100351_c0	65.93	55.91	62.81	37.13	35.47	38.76	41.74	36.89	43.6
comp100352_c0	20.74	18.21	16.15	15.55	14.81	20.67	23.79	20.8	22.93
comp100353_c0	0.35	0.11	0.24	0.93	0.65	1.75	1.87	1.83	1.72
comp100353_c1	77.24	50.86	72.08	23.55	32.7	29.46	30.73	30.56	33.44
comp100354_c0	4.53	4.94	3.56	5.88	5.13	8.15	8.01	7.25	7.61
comp100354_c1	1.85	1.45	1.04	2.99	1.01	2.56	2.71	3.47	2.33
comp100354_c2	3.47	1.94	1.08	1.53	0.69	2.25	1.12	4.48	0.73
comp100354_c3	1.2	1.11	1.32	2.47	2.26	2.05	1.86	2.29	2.58
comp100354_c4	2.47	3.27	1.86	3.26	2.1	4.04	5.79	4.36	7.13
comp100355_c0	10.29	9.84	3.98	5.14	4.45	6.35	5.36	4.89	6.15
comp100356_c0	0.25	0.7	0.13	0.86	0.82	0.13	0.4	0.37	0.92
comp100356_c1	3.34	1.43	1.93	2.04	1.7	1.01	0.39	1.48	1.81
comp100356_c2	18.97	20.02	15.38	24.93	22.74	19.15	24.18	25.22	20.78
comp100357_c0	13.43	10.16	14.03	7.29	9.59	8.88	5.84	7.58	7.24
comp100358_c0	18.98	14.36	15.7	18.54	17.33	17.71	21.83	20.57	18.13
comp100359_c0	26.32	27.09	22.49	22.88	16.23	23.44	24.87	23.67	23.82
comp100360_c0	7.99	8.02	26.27	11.74	14.49	17.43	13.52	10.66	14.14
comp100361_c0	10.54	6.73	7.07	4.24	4.65	5.48	4.11	6.55	6.19
comp100362_c0	9.78	1.64	2.05	3.85	2.29	3.64	8	3.34	2.93
comp100363_c0	0.19	1.54	0.45	7.39	2.06	7.62	0.64	1.9	2.96
comp100363_c1	0.13	0.97	0.81	6.58	0.85	3.94	0.28	0.77	2.09
comp100364_c0	1.94	2.5	1.21	1.02	0.98	1.47	1.93	2.82	0.93
comp100364_c1	0	0	0.73	0.16	0.26	0.3	0.45	0.14	0
comp100364_c2	4.29	4.53	3.62	3.38	2.7	5.27	5.16	5.08	6.21
comp100365_c0	28.63	29.01	25.89	25.93	19.67	40.58	54.16	48.66	50.36
comp100365_c1	0.26	0.48	0.53	0	0	0.55	0.83	0.25	1.27
comp100366_c0	10.79	13.4	15.91	7.92	10.52	11.28	16.98	12.14	16.56
comp100367_c0	19.49	11.89	16.95	20.16	26.26	24.08	19.07	23.25	23.16
comp100368_c0	10.08	10.19	8.45	10.55	8.51	12.31	13.88	11.78	12.54
comp100369_c0	4.52	18.98	2.64	10.58	7.81	23.21	19.02	22.57	27.62
comp100370_c0	17.32	16.75	19.14	30.86	31.76	29.04	36.88	37.65	39.08
comp100371_c0	6.51	8.04	5.61	3.61	4.74	8.9	5	4.01	5.29
comp100371_c1	54.69	37.07	47.74	55.04	49.21	50.88	57.87	56.72	59.79
comp100372_c0	4.21	4.05	4.47	4.3	4.35	3.71	5.13	3.8	4.58
comp100373_c0	18.59	16.6	20.57	22.02	18.57	22.45	26.49	23.1	24.7
comp100374_c0	15.06	15.11	14.31	15.88	14.33	13.61	18.78	18.44	16.94
comp100375_c0	19.2	23.79	20.95	35.26	20.95	24.71	40.75	36.65	35.57
comp100376_c0	13.68	8.48	10.66	5.81	6.24	4.63	9.35	9.01	8.92
comp100377_c0	35.56	70.32	57.19	168.39	268.25	169	132.63	162.69	154.04
comp100378_c0	4.79	1.34	2.27	3.41	1.92	3.59	1.7	3.12	5.25
comp100379_c0	30.24	28.59	21.59	32.28	23.17	31.63	40.95	40.5	38.22
comp100380_c0	12.1	11.94	9.92	11.1	9.69	10.4	12.25	14.54	12.4
comp100381_c0	565.92	668.87	611.98	559.04	684.45	756.33	578.16	567.44	607.08
comp100382_c1	0.66	1.06	0.84	2.23	0	0.7	2.95	0.31	0
comp100382_c2	12.72	13.93	10.73	12.38	10.26	13.5	18.83	16.8	18.24
comp100383_c0	36.12	45.02	65.98	73.19	113.01	68	38.62	56.74	51.83
comp100383_c1	1.3	3.24	1.97	4.63	1.84	2.94	0.88	2.67	2.46
comp100384_c0	0.37	0	0	0.21	0.5	0	0.58	0	0
comp100384_c1	3.21	4.65	2.71	7.1	4.41	4.97	9.93	5.76	9.65
comp100384_c2	0	0	0	0	0	0	0.69	0.21	0
comp100384_c3	18.83	26.89	31.05	38.79	52.83	36.13	27.82	33.99	28.55
comp100384_c4	9.9	7.08	11.73	15.48	15.19	14.39	9.69	9.35	13.59
comp100384_c6	1.77	1.52	0.36	1.74	1.42	0.88	1.89	1.38	0.29
comp100384_c7	1.08	1.77	0.93	1.23	1.02	1.66	1.16	1.44	0.81
comp100385_c0	22.71	15.21	21.05	22.87	19.93	22.66	21.86	21.8	20.79
comp100386_c1	38.52	40.05	34.13	44.02	39.05	46.07	53.81	49.07	54.44
comp100387_c0	72.78	87.81	78.24	26.01	25.35	21.45	27.5	24.34	23.96
comp100388_c0	4.09	2.83	2.77	3	2.9	3.03	3.52	3.41	2.05
comp100389_c0	60.93	57.38	54.23	55.69	52.51	63.04	76.53	68.2	74.2
comp100390_c0	93.59	75.27	82.89	47.58	44.51	54.09	51.4	45.66	48.3
comp100391_c0	33.41	18.96	26.51	12.6	21.85	11.98	12.06	9.91	12.26
comp100391_c1	18.81	11.09	22.88	10.71	22.44	8.07	7.82	8.91	6.1
comp100391_c2	41.72	25.22	41.19	17.89	36.06	17.49	18.38	19.17	14.72
comp100392_c0	97.33	85.75	88.68	73.58	66.71	73.86	65.99	78.05	63.02
comp100393_c0	2.16	0.81	1.35	2	1.25	2.23	0.4	3.05	0.31
comp100393_c1	3.79	6.67	5.08	6.57	6.33	5.12	6.78	6.64	5.46
comp100394_c0	20.43	15	19.96	20.68	22.06	19	15.06	17.61	10.87
comp100395_c0	3.85	5.01	4.16	4.63	3.29	5.25	7.81	5.32	7.82
comp100396_c0	31.48	48.69	37.75	39.3	58.57	47.34	39.04	33.57	37.39
comp100397_c0	15.12	17.09	13.45	15.89	12.96	16.82	18.67	18.61	16.86
comp100398_c0	17.34	35.45	27.46	95.71	115.62	84.68	73.38	78.64	76.55
comp100399_c0	24.69	26.99	51.11	16.98	8.55	51.61	14.97	13.75	18.25
comp100400_c0	21.86	25.91	18.07	23.97	18.34	22.09	35.14	32.92	31.19
comp100401_c0	6.71	8.28	9.47	10.29	10.99	10.65	12.76	12.6	14.99
comp100402_c0	12.65	10.83	10.82	4.04	3.57	3.73	3.89	3.82	3.87
comp100403_c0	2.75	2.76	2.21	1.7	1.22	1.68	3.31	2.49	2.85
comp100404_c0	68.74	67.87	56.29	31.08	34.05	31.97	43.03	41.22	38.13
comp100405_c0	26.48	32.65	27.72	10.09	7.23	9.59	12.57	10.31	8.4
comp100406_c0	42.79	57.09	49.66	34.9	33.47	50.15	48.15	39.55	49.05
comp100407_c0	0	0	0	0	0	0	0	0.27	0
comp100407_c1	3.26	2.54	4.11	0.29	0.3	0.82	0.14	0.51	0
comp100407_c2	0.77	0.54	0.5	0.99	0.45	0.51	1.03	0.57	0.59
comp100407_c3	43.85	30.12	37.84	18.28	22.57	25.73	25.38	25.68	24.58
comp100408_c0	47.37	57.96	79.14	39.39	42.44	52.5	43.44	45.44	51.26
comp100409_c0	69.84	74.94	61.8	138.01	128.02	133.31	126.33	133.83	127.58
comp100410_c0	1.51	1.84	1.12	3.45	4.18	3.7	4.69	4.72	3.44
comp100411_c0	7.38	5.83	2.94	5.21	2.99	4.67	4.66	3.46	7.43
comp100412_c0	111.91	97.18	78.32	101.69	72.89	96.53	115.49	114.79	109.77
comp100413_c0	5.37	5.04	5.23	8.9	8.85	7.17	5.16	5.26	4.37
comp100414_c0	3.67	3.72	2.57	2.07	2.1	2.38	2.28	2.77	3.22
comp100415_c0	4.53	8.14	6.1	5.03	5.84	5.94	6.11	6.04	4.93
comp100416_c0	12.01	9.29	8.98	10.31	10.36	11.54	13.05	14.1	12.98
comp100417_c0	14.55	14.72	15.44	22.07	23.78	22.92	38.58	34.25	37.03
comp100418_c0	20.64	13.92	14.77	20.08	11.97	19.41	18.44	16.71	16.01
comp100419_c0	6.13	6.01	7.19	5.78	5.7	6.13	6.93	5.51	6.27
comp100420_c0	1.7	1.56	1.8	2.55	3.12	3.01	3.15	3.95	4.3
comp100420_c1	0.29	0.27	0.15	0	0.13	0	0.78	0.14	0.36
comp100420_c2	74.14	178.82	72.38	111.55	129.86	86.24	205.8	123.67	131.94
comp100421_c0	10.69	7	10.26	14.03	13.33	11.4	11.05	14.56	11.98
comp100422_c0	52.63	29.28	42.38	44.91	31.92	45.9	35.44	41.44	34.97
comp100423_c0	14.19	12.08	14.25	8.22	6.91	9.27	10.17	8.83	8.61
comp100424_c0	78.28	58.21	80.31	72.04	64.27	133.96	79.17	82.96	90.96
comp100425_c0	1.71	3.04	2.49	0.82	1.12	0.54	1.26	1.09	1.56
comp100425_c1	0	0	0	0.5	0.2	0	0.7	0	0
comp100426_c0	48.61	47.35	35.37	34.51	38.14	38.42	48.18	46.42	46.97
comp100427_c0	21.44	18.4	16.46	18.38	16.58	18.67	20.42	20.28	21.46
comp100428_c0	102.04	132.14	95.07	26.29	33.19	27.3	25.47	26.39	27.28
comp100429_c1	1.16	1.33	0	0.65	0.13	0.46	1.69	0.14	0.18
comp100429_c2	0.97	0.8	0.78	0.98	0.4	1.15	0	0.21	0
comp100429_c3	40.39	51.75	43.38	55.17	60.33	45.68	35.83	59.38	58.52
comp100429_c4	15.37	14.76	13.38	13.81	14.19	18.21	20.03	16.49	18.42
comp100430_c0	4.86	4.7	4.31	2.78	2.09	3.13	2.75	3.81	2.82
comp100431_c0	120.64	190.89	124.27	113.97	167.78	144.52	99.62	87.79	93.6
comp100431_c1	13.4	38.71	54.78	20.07	61.43	25.64	18.96	13.54	17.77
comp100432_c0	145.44	102.63	101.18	51.15	49.65	60.03	59.36	58.72	53.06
comp100433_c0	30.7	22.76	18.63	59.11	46.07	63.53	68.61	66.78	61.53
comp100434_c0	4.62	4.11	4.2	4.04	3.46	4.05	2.55	5.39	4.36
comp100435_c0	23.87	23.29	25.02	46.34	40.71	45.12	29.29	24.72	33.31
comp100435_c1	8.41	10.51	9.69	7.9	8.47	6.64	11.64	9.04	12.01
comp100436_c0	1.25	8.01	11.88	16.21	6.55	43.51	9.1	15.83	24.68
comp100437_c0	9.2	8.3	18.61	7.35	9.93	10.25	7.81	8.3	7.22
comp100438_c0	4.04	4.46	4.67	3.36	4.31	6.29	2.71	3.48	3.66
comp100439_c0	14.09	7.77	9.51	27.94	27.96	32.9	23.57	21.65	20.48
comp100440_c0	19.51	25.16	20.28	18.83	21.09	19.71	29.58	24.41	28.55
comp100441_c0	63.89	63.15	65.19	46.81	33.47	50.67	60.54	57.75	56.71
comp100442_c0	6.78	6.4	7.34	7	9.55	8.04	7.77	8.25	7.17
comp100443_c0	17.91	19.21	23.44	19.42	19.95	18.35	22.44	18.97	20.49
comp100444_c0	6.82	6.65	5.85	5.83	5.58	7.1	9.13	7.77	9.43
comp100445_c0	16.79	21.14	26.13	20.43	17.42	19.53	18.04	19.34	23.83
comp100446_c0	16.68	16.74	13.84	15.97	17.2	18	16.13	13.34	13.24
comp100447_c0	12.21	2.56	0.89	1.16	0.46	2.78	0.4	0.72	0.99
comp100447_c1	22.17	6.56	3.08	1.72	1.57	5.33	1.25	1.63	2.5
comp100448_c0	2.25	2.11	2.38	1.38	1.27	1.79	1.01	1.44	1.15
comp100448_c2	2.87	2.77	0.46	1.02	0.55	2.41	0.16	0.43	0.55
comp100449_c0	112.86	99.19	74.88	113.09	82.32	117.06	137.98	125.8	128.77
comp100450_c0	9.87	10.02	6.1	11.12	8.73	9.92	14.3	11.35	8.77
comp100451_c0	7.54	9.69	7.21	4.05	4.37	9.59	6.42	8.32	9.25
comp100452_c0	49.06	57.75	97.6	99.81	120.24	110.28	68.3	81.36	92.78
comp100453_c0	5.49	5.96	8.1	13.02	10.91	13.4	13.89	14.24	14.54
comp100454_c0	0.29	0.81	0.5	1.33	0.55	0.21	0.62	0.86	0.24
comp100454_c1	2.53	4.16	2.59	1.72	1.38	1.95	2.77	2.34	2.35
comp100454_c2	0.1	0.28	0.73	0.8	0.57	0.11	0	0	0.12
comp100455_c0	0	0	0.52	0	0	0	0	0.47	0
comp100455_c1	25.81	18.67	16.64	12.55	10.15	12.37	10.92	10.87	9.54
comp100456_c0	3.86	2.36	2.49	4.67	3.75	4.58	5.54	6.3	6.29
comp100457_c0	13.65	15	14.19	11.83	13.14	12.57	10.4	10.82	13.63
comp100458_c0	2.3	3.64	2.16	1.44	1.58	1.03	1.76	2.24	1.58
comp100459_c0	445.87	335.71	385.91	400.54	389.57	431.79	393.41	392.41	379.02
comp100459_c1	2.08	1.89	6.56	2.98	12.2	3.48	5.82	12.3	6.04
comp100460_c0	80.39	96.56	72.07	33.46	39.46	35.94	30.84	33.45	29.68
comp100461_c0	16.08	31.31	32.51	20.52	31.14	15.6	14.37	17.01	14.78
comp100462_c0	4.86	4.28	5.25	7.24	3.12	12.65	7.21	8.11	11.31
comp100463_c0	12.98	10.25	8.61	6.94	3.72	5.82	10.6	10.29	8.99
comp100463_c1	0	0.3	0	0.36	0.57	0	0	1.75	2.34
comp100464_c0	14.96	20.81	22.11	15.38	14.68	28.4	24.05	19.05	23.6
comp100465_c0	8.74	8.15	7.13	6.72	6.18	8.86	7.64	7.51	7.56
comp100465_c1	0.75	0.09	0	0.32	0.88	0.6	0.4	0.37	0.92
comp100466_c0	2.32	2.16	1.98	1.47	0.68	1.83	1.97	0.75	0.73
comp100466_c1	5.49	3.49	2.84	3.02	4.59	3.83	3.93	2.97	3.95
comp100467_c0	22.36	19.67	21.63	20.31	18.71	20.39	25.75	21.21	23.5
comp100468_c0	0.12	2.86	3.98	1.84	4.24	0.87	0.26	1.59	0.75
comp100469_c0	396.78	499.89	734.2	917.01	408.31	1793.11	420.23	618.55	967.85
comp100470_c0	2.44	2.91	2.59	2.99	2.9	2.33	4.37	3.38	3.77
comp100471_c0	206.17	255.4	302.86	915.47	1103.07	755.78	845.01	1071.38	913.1
comp100472_c0	9.61	9.76	10.21	13.58	11.6	10.65	13.41	13.61	12.2
comp100473_c0	1.22	0.9	3.99	0.96	2.25	1.81	2.2	1.54	1.78
comp100473_c1	1.58	3.1	0.68	1.4	0.68	1.64	1.87	1.37	2.65
comp100473_c2	12.83	11.81	12.3	10.59	7.59	9.59	10.15	11.12	8.76
comp100474_c0	18.58	15.85	13.83	11.5	9.47	10.83	15.3	13.66	13.37
comp100475_c0	10.67	7.88	10.78	15.79	15.72	12.49	18.41	16.36	19.39
comp100476_c0	7.21	9.22	5.07	6.04	3.06	5.76	7.97	6.01	9.18
comp100477_c0	44.59	37.93	33.4	32.83	27.5	34.13	34.61	37.53	32.8
comp100478_c0	76.15	56.46	59.71	71.92	48.64	93.63	97.24	80.93	96.85
comp100479_c0	88.77	85.29	98.08	106.51	109.92	116.34	110.39	100.28	102.69
comp100480_c0	4.9	5.49	4.91	3.59	4.59	7.17	5.5	4.96	6.38
comp100481_c0	11.52	5.76	8.54	11.61	9.43	13.26	12.48	10.87	11.35
comp100482_c0	27.2	28.8	26.48	24.57	23.34	25.35	36.71	35.87	36.7
comp100482_c1	0.8	0.82	0.5	0.91	0.15	0.34	1.38	1.59	0.59
comp100483_c0	280.47	460.11	358.34	291.14	467.58	327.28	287.25	291.69	308.05
comp100484_c0	1.84	1.79	1.47	2.14	2.32	1.99	2.4	2.94	3.23
comp100485_c0	18.94	31.7	29.38	12.49	18.05	15.45	16.15	19.49	19.97
comp100486_c0	15.65	16.98	14.01	16.15	12.89	16.9	21.06	17.54	20.23
comp100486_c1	0	0.56	0.78	0	0.28	0.16	0.49	0	0
comp100486_c2	0.78	1.05	1.91	1.61	1.67	2.41	1.07	1.06	3.11
comp100487_c0	47.71	47.03	49.61	78.13	74.31	101.38	74.08	77.69	76.18
comp100488_c0	48.19	43.76	34.26	18.51	23.04	20.58	33.46	28.45	28.04
comp100488_c1	16.57	11.25	9.79	8.06	8.45	13.54	13.6	15.53	11.04
comp100488_c2	3.08	5.78	5.89	0.61	3.58	0.71	3.27	1.81	4.07
comp100489_c0	62.7	66.15	58.22	49.79	46.41	52.15	60	58.82	62.11
comp100490_c0	99.54	103.67	88.4	113.56	97.79	140.9	141.51	117.48	150.85
comp100491_c0	102.31	85.56	86.67	88.98	87.01	95.26	113	105.6	116.66
comp100492_c0	8.71	7.49	7.54	14.78	11.39	19.25	18.89	17.61	17.6
comp100493_c0	23.58	27.91	28	38.77	47.15	42.81	35.32	41.74	38.21
comp100494_c0	37.95	32.45	38.75	30.21	28.12	27.97	34.47	32.09	32.82
comp100495_c0	32.33	25.85	23.83	21.72	16.13	27.06	20.27	16.32	13.35
comp100496_c0	7.88	6.63	7.46	7.09	5.74	8.26	9.43	9.61	9.46
comp100497_c0	6.48	5.42	4.51	6.43	4.56	7.28	7.12	7.58	7.9
comp100498_c0	2.59	4.33	3.61	5.87	6.95	5.35	6.49	6.56	5.77
comp100499_c0	8.18	9.94	8.92	10.85	11.83	10.09	11.77	10.88	13.18
comp100499_c1	0.5	0.81	0.13	0.99	0.46	1.07	0.8	2.19	2.29
comp100499_c2	0.32	0.25	0.44	1.33	0.45	1.47	1.31	1.97	2.02
comp100500_c0	5.39	6.2	7.06	11.28	11.93	11.51	11.57	11.52	10.96
comp100501_c0	1.8	2.67	2.53	1.7	1.92	1.99	2.54	2.3	4.35
comp100502_c0	20.18	15.78	16.24	16.32	13.23	14.27	17.42	17.05	16.48
comp100503_c0	4.21	5.61	3.45	6.27	4.62	4.49	8.11	6.67	5.52
comp100504_c0	17.9	16.46	11.64	25.2	16.44	27.57	32.78	25.95	26.6
comp100505_c0	3.78	4.74	3.72	1.15	1.42	1.28	1.26	1.5	1.29
comp100506_c0	174.8	321.06	207.45	226.21	237.29	192.5	289.67	313.62	301.43
comp100507_c0	3.25	3.71	3.13	5.8	4.57	5.73	9.51	6.22	5.06
comp100508_c0	4.97	7.28	6.16	4.82	4.37	5.83	6.73	7.17	5.7
comp100509_c1	39.03	30.48	31.48	55.15	49.37	54.4	79.74	67.74	71.32
comp100510_c0	32.16	37.9	38.1	27.43	25.04	24.58	34.58	28.92	30.42
comp100511_c0	2.48	7.78	7.41	8.91	13.72	9.73	12.57	13.27	14.31
comp100511_c1	0.23	1.67	0.46	0.51	0.2	0.73	0	0	0
comp100511_c2	2.09	3.17	2.13	1.44	1.41	2	1.7	1.23	1.32
comp100512_c0	29.57	25.1	28.8	40.08	36.41	44.89	45.03	42.18	43.98
comp100513_c0	3.06	1.96	1.6	3.11	1.09	1.8	2.45	2.28	2.34
comp100514_c0	3.18	1.76	2.49	4.16	2.9	3.69	3.55	4.29	3.72
comp100515_c0	24.01	20.76	18.08	11.8	7.24	8.42	13.92	10.22	11.18
comp100516_c0	22.23	12.71	21.54	23.52	19.59	22.43	26.08	28.19	24.69
comp100516_c1	0	0	0	0	0.25	0.31	0	0.52	0
comp100517_c0	14.73	8.89	13.34	12.44	12.97	13.97	12.73	16.43	19.33
comp100518_c0	8.09	6.24	7.04	10.45	8.71	9.64	12.04	12.47	10.44
comp100519_c0	26.1	27.34	23.71	21.11	20.03	23.82	21.01	24.97	22.39
comp100520_c0	16.42	13.42	15	12.87	17.35	12.92	17.7	16.02	14.61
comp100520_c1	6.39	2.31	5.79	5.41	6.87	3.62	3.98	3.9	3.86
comp100521_c0	19.04	11.62	16.7	17.96	17.31	17.89	19.16	18.16	16.84
comp100522_c0	15.51	13.78	10.43	12.57	11.5	13.82	14.34	15.47	16
comp100523_c0	11.38	11.33	9.61	3.82	2.87	4.37	8.57	6.49	5.09
comp100524_c0	2.49	2.64	2.25	2.59	2.16	2.12	2.5	2.58	2.13
comp100525_c0	12.55	16.83	14.68	11.37	13.62	16.47	16.46	17.54	14.86
comp100525_c1	4.98	7.24	8.4	3.74	4.51	5.66	5.82	3.71	4.69
comp100525_c2	0.4	0	0.15	0	0	0	0	0.37	1.19
comp100525_c3	0	0.3	0	0	0.28	0	0	0.29	0
comp100526_c0	6.36	8.29	11.1	14.17	17.12	13.38	10.15	10.55	10.64
comp100527_c0	4.63	5.15	3.88	17.42	13.68	19.76	25.5	24	27.04
comp100528_c0	10.79	8.06	9.35	3.72	3.91	3.84	5.47	5.17	4.62
comp100529_c0	241.2	345.68	285.93	524.83	540.49	459.19	424.89	440.58	450.6
comp100530_c0	5.32	2.54	4.58	7.44	6.47	10.06	5.37	5.72	5.88
comp100531_c0	7.81	5.85	6.71	8.21	6.66	10.56	11.1	11.1	12.45
comp100532_c0	15.47	13.55	11.49	9.54	9.96	11.49	6.39	12.12	11.33
comp100533_c0	3.02	3.58	4.03	2.32	3.84	3.34	2.44	3.97	2.82
comp100534_c0	3.5	6.59	4.06	5.73	6.94	6.07	9.06	6.1	7.11
comp100535_c0	12.97	12.47	12.69	8.16	7.82	11.2	15.09	16.03	16.47
comp100535_c1	4.86	3.4	4.18	3.37	3.23	3.68	4.03	3.88	4.36
comp100536_c0	15.75	18.13	13.93	20.88	19.98	19.16	20.22	22.35	22.41
comp100537_c0	26.99	26.38	27.73	38.15	31.84	45.92	39.13	41.41	40.48
comp100538_c0	446.77	306.63	376.57	387.31	265.85	723.44	356.65	422.48	414.32
comp100539_c1	99.04	94.3	90.79	142.98	130.89	144.77	107.11	114.81	101.68
comp100539_c2	0	0	0	0	0.48	0	0	1.23	0.97
comp100540_c0	3.39	2.47	10.62	2.57	1.51	0.76	1.96	1.82	0.79
comp100541_c0	33.72	55.07	44.09	17.69	15.09	21.16	18.7	16.26	18.27
comp100542_c0	25.06	20.45	36.06	24.98	21.78	24.5	15.61	17.3	17.51
comp100543_c0	256.66	207.22	214.49	50.15	107.01	51.51	39.08	44.05	39.72
comp100544_c0	14.37	11.1	14.7	11.98	14.08	14.17	11.13	12.1	12.82
comp100545_c0	3.92	4.77	3.82	3.46	2.99	3.58	5.02	4.33	4.81
comp100546_c0	40.32	43.79	53.14	56.05	56.23	48.68	55.09	53.88	52.18
comp100547_c0	12.33	9.76	12.36	6.29	5.68	4.45	7.11	6.22	8.06
comp100548_c1	24.95	27.8	24.95	29.22	22.98	26.46	25.29	27.59	20.15
comp100548_c2	0.86	1.64	0.82	0.56	0.98	0.72	0.86	0.73	2.03
comp100548_c3	0	0	0.24	0.53	0	0.76	0	0.22	0
comp100549_c0	6.77	4.93	4.59	6.54	4.36	5.41	6.97	7.74	8.44
comp100550_c0	0.32	0.59	0.67	0.91	1.33	0	2.04	1.32	0.78
comp100550_c1	0	0.7	0	0	0	0	0	1.18	0
comp100550_c2	10.39	5.83	6.63	5.37	3.59	7.04	7.03	7.34	7.09
comp100551_c0	5.41	6.24	6.62	5.05	8.2	7.89	6.86	6.94	7.31
comp100551_c1	4.54	7.09	4.66	8.72	4.51	8.91	11.79	10.93	8.91
comp100551_c2	35.44	28.03	29.14	33.69	29.2	30.94	34.86	35.26	34.18
comp100552_c0	12.22	14.34	11.56	9.37	10.5	14.08	16.12	15.56	13.7
comp100553_c0	6.44	7.8	5.95	7.31	7.73	7.09	8.14	9.23	8.7
comp100554_c0	5.46	5.19	4.19	3.47	1.94	3.59	5.42	4.12	4.91
comp100555_c1	1.18	0.89	0.44	3.17	0.76	3.53	2.19	0.8	0.33
comp100555_c2	6.25	3.04	4.76	4.02	5.18	5.09	5.07	4.81	4.14
comp100556_c0	3.86	3.26	3.67	5.88	4.63	6.52	6.65	6.96	8.09
comp100557_c0	0.94	1.28	1.78	2.77	5.11	2.71	2.99	1.45	1.31
comp100558_c0	0.19	3.37	0.89	21.44	5.67	19.35	3.57	6.29	5.79
comp100559_c0	143.95	112.81	134.82	154.88	132.93	135.05	142.52	158.93	130.8
comp100560_c0	318.95	159.7	166.97	112.8	66.36	69.8	128.05	100.37	90.01
comp100561_c0	10.45	9.45	10.83	6.42	6.13	11.02	10.16	9.55	9.85
comp100562_c0	60.6	63.87	61.88	64.37	62.11	81.2	72.48	71.31	83.51
comp100563_c0	2.71	2.59	1.87	1.78	2.33	2.49	3.64	1.73	2.11
comp100564_c0	15.79	13.7	16.93	15.19	12.19	14.56	18.37	13.79	15.15
comp100565_c1	43.37	46.65	46.13	45.63	49.17	55.2	53.57	57.36	50.27
comp100566_c0	61.56	70.18	63.43	93.33	94.23	92.37	93.63	96.35	98.33
comp100567_c0	15.34	9.46	14.49	6.95	8.05	11.07	7.41	6.13	7.94
comp100567_c1	0.48	0.33	1.71	0.94	0.22	0	0	0.35	0.72
comp100567_c2	4.04	2.6	3.38	1.49	3.16	2.5	1.61	1.85	2.18
comp100568_c0	51.08	52.63	55.51	110.81	86.66	96.46	97.03	96.11	92.16
comp100569_c0	139.63	108.43	97.12	38.81	47.49	147.76	51.5	42.9	61.93
comp100570_c0	18.13	12.52	14.12	15.47	14.03	18.2	22.48	26.84	21.66
comp100571_c0	11.06	14.29	11.98	3.18	3.88	4.15	7.65	5.02	6.4
comp100572_c0	15.91	17.71	15.82	13.9	11.4	12.34	15.13	13.63	14.02
comp100573_c0	2.92	2.81	4.58	4.54	3.49	2.63	4.19	4.64	2.59
comp100574_c0	2.19	2.99	3.8	2.35	3.52	6.25	3.06	2.66	5.5
comp100574_c1	8.93	9.62	13.2	7.85	6.73	42.53	9.96	12.31	10.53
comp100575_c0	96.65	76.69	53.76	39.84	39.78	39.58	40.72	47.15	39.91
comp100576_c1	1.97	1.07	2.58	2.34	2.06	1.64	2.3	1.84	1.91
comp100577_c0	6.27	10.5	9.75	17.43	20.55	14.51	11.68	14.7	13.5
comp100578_c0	13.26	8.2	7.9	12.49	9.31	18.55	10.36	10.01	11.19
comp100579_c0	44.67	36.14	35.95	92.72	89.32	91.24	73.25	78.47	74.45
comp100580_c0	8.75	4.95	10.05	3.97	5.42	4.5	5.04	3.49	5.02
comp100581_c0	25.42	25.61	42.19	41.45	70.73	35.77	26.2	30.72	26.2
comp100582_c0	12.19	12.95	14.67	8.17	8.39	9.83	10.34	11.12	13.23
comp100583_c0	8.29	7.43	7.71	8.16	7.26	8.46	9.31	9.22	8.16
comp100584_c0	7.13	8.16	10.89	10.89	11.52	8.82	9.77	8.72	9.19
comp100585_c0	9.3	11.78	12	13.21	13.88	12.17	16.23	14.74	14.82
comp100586_c0	232.23	231.84	193.05	192.5	159.44	222.92	255.36	242.22	251.12
comp100587_c0	232.33	201.87	184.49	235.99	182.35	208.79	253.8	230.57	237.07
comp100588_c0	33.5	36.17	42.65	12.97	15.67	19.27	13.71	17.24	14.96
comp100588_c1	861.3	502.79	628.57	1219.11	1169.59	1214.27	1312.33	1316.26	1248.23
comp100589_c0	35.85	32.27	39.87	31.09	25.01	29.72	35.68	29.4	31.53
comp100590_c0	11.94	10.9	7.84	7.65	6.11	7.57	10.8	9.5	8.28
comp100591_c1	20.09	26.41	23.83	22.32	19.4	25.98	33.35	33.75	25.86
comp100592_c1	54.55	26.23	35.43	34.97	32.8	37.8	40.75	48.53	43.04
comp100592_c3	0.87	0.64	0.35	0	0	0.37	0	0.16	0
comp100593_c0	20.88	22.28	19.42	22.44	21.04	25.76	28.15	22.49	25.94
comp100594_c0	25.95	20.22	18.46	16.65	9.27	19.34	17.55	15.96	15.67
comp100595_c0	5.2	6.51	6.97	6.31	6.56	6.39	5.79	6.42	5.26
comp100596_c0	149.78	122.23	124.05	86.96	61.08	96.34	83.94	82.35	79.04
comp100596_c1	0.58	0.67	0.59	0.33	0.13	0.31	0	0.7	1.06
comp100597_c0	3.19	4.4	3.17	2.17	3.1	12.92	2.95	4.86	2.19
comp100598_c0	49.49	40.18	32.68	40.26	28.5	44.68	48.38	45.62	48.27
comp100599_c0	11.6	12.9	9.55	12.36	9.05	11.05	11.22	11.9	13.24
comp100600_c0	14.92	9.25	6.38	7.76	5.45	9.51	11.31	10.14	14.3
comp100601_c0	19.34	18.42	18.29	9.63	9.21	9.28	11.38	11.54	9.42
comp100601_c1	1.88	2.42	1.88	1.96	1.35	1.76	2.21	1.89	3.21
comp100602_c1	12.31	12.04	9.52	12.96	11.5	13.37	17.88	17.3	11.35
comp100603_c0	3.08	6.15	3.56	5.45	2.72	1.71	2.56	8.02	3.42
comp100603_c1	6.52	9.38	8.65	5.46	7.55	6.8	5.08	8.94	7.59
comp100604_c0	1.31	1.74	4.49	4.95	7.38	14.19	4.73	5.12	4.66
comp100605_c0	14.7	12.19	12.25	23	17.71	20.61	25.03	23.65	26.33
comp100606_c0	2.99	2.55	2.5	3.45	1.86	3.35	3.72	2.95	3.58
comp100606_c1	1.03	2.03	1.22	1.87	1.36	2.13	2.01	1.93	1.91
comp100607_c0	37.57	40.95	34.48	34.76	31.49	33.31	48.69	39.09	42.02
comp100608_c0	15.81	19.19	14.39	17.38	16.29	18.06	21.6	20.49	17.74
comp100608_c1	0.25	0.45	0.13	0.14	0.68	0.52	0.39	0.38	0.15
comp100609_c0	21.63	16.49	16.53	16.48	12.54	17.64	15.11	14.23	12.54
comp100609_c1	0	0	0.42	0	0	0.22	0	0	0.75
comp100610_c0	21.23	20.93	20.02	19.42	18.06	20.08	30.21	28.77	25.52
comp100611_c0	72.93	45.29	77.96	88.72	85.46	95.1	74.64	84.85	82.42
comp100612_c0	21.15	18	14.7	18.04	14.26	19.85	21.82	20.55	22.67
comp100613_c1	21.82	19.52	20.12	34.73	29.96	40.3	31.85	34.1	33.16
comp100613_c2	1.72	1.7	1.08	0.66	1.28	0.91	0.97	1.74	1.13
comp100613_c3	0.99	0.2	0.56	2.24	2.15	2.81	0.7	0.21	0.4
comp100613_c5	2.01	0	0.78	3.15	1.02	1.97	0.1	0.49	0.67
comp100614_c0	41.95	51.48	49.06	28.1	33.76	27.86	28.15	27.55	28.84
comp100615_c0	250.88	246.21	171.65	148.45	121.63	203.15	217.65	185.24	235.08
comp100615_c1	11.12	11.53	12.31	12.57	9.09	12.86	11.57	10.79	11.99
comp100616_c0	1.83	0.85	0.91	1.58	0.82	1.16	1.27	2.05	1.67
comp100616_c1	1.94	3.48	2.95	3.46	2.17	1.52	4	3.69	2.23
comp100616_c3	9.09	7.22	6.52	5.79	4.82	6.32	6.36	5.47	7.78
comp100616_c4	4.63	2.77	2.73	2.78	2.86	2.07	3.29	3.57	4
comp100617_c0	43.29	38.1	50.64	28.34	31.35	30.16	27.97	28.05	33.94
comp100618_c0	92.1	49.2	53.42	65.76	48.07	80.56	78.55	63.95	80.43
comp100618_c2	0.45	0	0	1.51	0.6	1.19	0.23	0.42	0.81
comp100619_c0	1.07	0.81	0.36	0.8	0.48	0	0.75	0	0
comp100619_c1	0	0	0	0	1.21	0	0	0	0
comp100619_c2	37.22	47.79	40.57	38.8	40.24	39.84	50.03	48.48	47.5
comp100620_c1	15.96	10.65	10.55	26.6	23.11	27.89	34.82	31.89	31.66
comp100621_c0	6.22	7.29	7.47	7.89	7.89	9.65	8.12	8.22	9.6
comp100622_c0	12.02	12.6	12.58	12.4	14.89	11.09	15.32	13.16	11.82
comp100623_c0	3.62	4.42	4.31	5.56	5.08	5	5.75	6.55	4.74
comp100624_c0	19.43	20.68	17.45	46.97	41.82	50.77	41.03	46.05	38.76
comp100624_c1	0.72	1.05	1.17	1.3	1.19	1.22	1.97	0.98	1.92
comp100625_c0	140.02	109.47	158.67	115.94	49.05	133.17	79.29	84.49	104.13
comp100626_c0	22.98	20.83	16.48	18.36	13.05	18.33	23.89	24.14	25.86
comp100627_c0	7.22	8.75	12.56	10.77	15.58	11.46	9.62	10.65	9.73
comp100628_c0	1.88	0.71	1.31	3.45	1.88	1.52	1.66	2.48	1.96
comp100628_c1	3.66	2.02	2.68	4.26	3.92	6.19	5.49	4.33	3.99
comp100628_c2	2.07	0.84	0.47	2.06	1.71	1.65	3.33	1.93	3.25
comp100629_c0	2.24	3.26	2.57	4.67	2.98	4.1	5.68	5.51	3
comp100630_c0	191.73	157.36	142.39	175.52	139.38	199.2	234.64	208.31	221.98
comp100631_c0	256.33	294.93	332.35	145.72	245.99	215.93	141.67	154.53	143.48
comp100632_c0	4.48	5.76	3.49	3.61	3.18	4	5	4.42	4
comp100633_c0	40.48	49	43.44	30.14	23.42	31.75	37.66	28.81	31.25
comp100634_c0	9.58	8.37	9.84	10.69	9.36	10.62	11.97	11.33	9.41
comp100635_c0	8.31	4.71	6.8	3.76	3.26	4.96	4.41	5.09	4.99
comp100636_c0	8.06	7.96	8.03	5.98	5.59	5.79	7.89	9.13	9.32
comp100637_c0	1.04	0.24	0.4	0.44	0.12	0.69	0.14	1.01	0.95
comp100637_c1	0.18	0.33	0.18	1.83	0.66	1.34	0.76	0.34	2.4
comp100637_c2	30.07	43.5	49.65	49.93	65.16	53.18	58.32	56.11	59.39
comp100638_c0	5.65	5.85	7.67	6.36	1.85	5.77	8.03	7.91	7.33
comp100639_c0	59.54	56.55	48.05	57.37	41.57	61.03	66.46	61.12	68.44
comp100640_c0	20.17	23.7	15.51	18.5	11.8	17.56	23.44	18.85	22.49
comp100641_c0	20.75	11.55	30.38	10.49	5.39	141.21	24.59	32.07	31.18
comp100642_c0	22.08	19.29	15.52	32.92	24.92	28.47	38.46	35.79	34.5
comp100643_c0	28.01	28.14	26.04	30.81	32.96	36.43	43.05	40.2	44.02
comp100644_c0	16.91	10.22	13.58	22.7	22.26	23.7	30.42	36.57	32.77
comp100645_c1	5.57	4.73	5.62	4.79	5.18	6.76	3.82	5.35	5.62
comp100646_c0	25.05	19.64	20.47	32.65	22.53	30.61	35.17	35.19	36.45
comp100647_c0	44.33	49.33	49.19	27.4	28.42	30.05	32.26	33.53	40.36
comp100648_c0	377.62	360.48	430.28	319.97	313.55	319.87	257.67	296.57	281.86
comp100649_c0	27.62	23.71	22.7	26.18	18.15	23.03	23.82	22.95	25.41
comp100650_c0	22.17	20.73	26.08	21.44	23.79	21.91	17.54	19.69	16.44
comp100651_c0	21.54	17.92	15.75	22.02	13.98	21.56	21.75	23.18	20.37
comp100652_c0	19.05	21.08	12.42	10.72	11.22	14.19	18.71	17.4	18.81
comp100653_c0	1.75	2.91	3.17	3.07	3.35	2.8	3.13	2.92	3.91
comp100654_c0	138.39	128.3	123.56	130.38	109.84	119.29	133.34	137.59	136.72
comp100655_c0	51.16	40.74	36.63	41.47	22.71	43.13	48.02	46.84	50.43
comp100656_c0	5.67	3.06	1.4	3.87	4.31	4.97	6.09	13.35	9.41
comp100657_c0	55.01	38.27	53.47	71.34	66.37	76.35	56.91	62.92	58.1
comp100658_c0	0.5	0.49	1.01	3.94	3.28	2.36	1.97	3.42	3.97
comp100659_c0	66.94	68.52	57.5	65.15	57.96	64.26	72.35	68.12	70.79
comp100660_c0	0.53	0.58	2.27	0.96	0.59	0	0.56	1.13	0.13
comp100660_c1	4.82	4.2	9.57	2.95	7.26	4.86	2.44	4.04	4.39
comp100660_c2	0.09	0.42	1.58	1.02	0.34	0.29	1.35	1.51	1.99
comp100661_c0	4.03	4.34	5.66	3.81	6.78	4.83	3.76	3.95	2.12
comp100662_c0	22.67	24.79	24.32	36.94	29.11	44.61	35.86	34.32	29.91
comp100663_c0	8.18	2.56	4.2	5.37	3.77	7.43	7.74	6.76	6.81
comp100664_c0	2.93	1.86	3.62	3.01	2.59	2.54	2.27	2.04	2.37
comp100664_c1	1.06	1.52	1.57	2.67	0.99	0.88	1.38	0.8	0.86
comp100664_c2	0.63	0	1.93	0.89	0.72	0	0	0.6	2.48
comp100665_c0	37.98	23.97	24.45	18.59	18.62	21.83	35.52	30.54	33.78
comp100666_c0	32.43	22.03	25.03	27.56	23.91	33.67	35.56	36.19	33.78
comp100667_c0	13.76	12.19	11.31	15.29	12.42	15.72	19.04	16.78	16.54
comp100668_c0	0.68	0.47	0.7	1.92	1.87	0.36	1.26	1.3	1.86
comp100668_c1	39.71	38.23	33.35	35.19	36.87	37.1	43.44	39.86	40.1
comp100668_c2	2.07	0.63	0.2	0.22	0.09	0.94	0.21	1.93	0.6
comp100668_c3	0	0	0.28	0	0	0	0	1.5	0.33
comp100668_c4	1.43	1.87	2.55	0.61	1.11	0.92	1.65	2.01	3.98
comp100669_c0	6.55	5.3	6.63	10.9	9.95	16.53	14.34	13.4	13.43
comp100669_c1	4.82	3.2	5.46	4.22	4.67	6.97	5.05	8.02	6.82
comp100670_c0	2.6	2.22	3.67	2.65	2.77	3.26	2.72	2.79	2.78
comp100670_c1	5.35	5.93	4.51	5.6	6.36	6.81	6.81	8.23	6.16
comp100671_c0	6.37	8.63	7.3	5.96	6.43	5.5	6.72	5.33	4.32
comp100672_c0	3.38	3.27	3.95	2.77	2.23	2.36	3.46	2.13	2.58
comp100673_c0	5.89	6.29	6.65	10.08	10.61	9.75	12.93	11.98	10.97
comp100674_c0	50.12	39.03	32.22	39.71	32.38	45.91	51.98	49.75	50.9
comp100675_c0	17.14	9.25	17.36	5.62	6.67	8.61	5.47	5.32	4.14
comp100676_c0	4.25	3.59	4.45	5.03	4.61	4.13	5.11	4.47	4.77
comp100677_c0	2.63	2.32	1.53	2.23	1.29	1.89	3.38	3.7	3.58
comp100678_c0	14.31	13.55	11.71	20.33	18.15	20.47	22.7	21.03	22.03
comp100679_c0	111.33	92.59	72.93	24.06	26.88	31.34	20.74	24.95	23.31
comp100680_c2	9.22	11.44	12.9	13.07	10.21	9.5	10.58	14.92	8.19
comp100681_c1	0	0	0.26	0.28	0.23	0	0	0	0
comp100681_c2	165.76	277.39	293.39	387.75	413.82	292.65	312.31	356.52	293.49
comp100682_c0	24.49	23.01	26.96	22.82	18.41	20.2	23.05	27.07	27.85
comp100683_c0	9.08	6.14	8.71	5.58	7.15	7.83	4.73	7.66	5.47
comp100684_c0	40.77	33.66	29.07	41.78	28.7	35.72	40.89	36.2	38.97
comp100685_c0	11.06	12.57	21.84	14.71	20.85	12.49	6.8	10.13	8.16
comp100686_c0	8.77	3.57	8.3	3.83	8.8	7.76	3.55	2.9	3.42
comp100687_c0	1.05	0.93	1.03	1.44	0.98	1.22	1.93	1.5	1.84
comp100687_c1	0.89	0.36	0.1	1.45	1.66	1.05	0.55	1.74	1.21
comp100688_c0	4.43	6.7	6.74	5.76	3.04	6.67	5.92	6.12	5.64
comp100689_c0	13.92	13.86	11.05	16.98	12.51	16.46	17.98	15.51	17.73
comp100690_c0	49	28.44	58.6	42.25	42.15	66.59	35.18	30.56	36.21
comp100691_c0	3.76	2.59	2.7	2.98	2.23	3.46	4.18	3.5	2.97
comp100691_c1	44.47	49.34	38.77	40.74	41.41	43.06	63.14	54.91	55.26
comp100692_c0	5.17	4.96	6.96	6.08	7.41	5.26	5.6	4.63	6.15
comp100693_c0	27.66	25.76	22.19	13.65	8.11	11.13	20.7	17.08	17.07
comp100694_c0	5.63	6.15	5.12	6.72	6.54	6.9	8.68	8.28	10.1
comp100695_c0	78.37	62.49	69.43	44.83	51.73	49.85	65.98	53.87	59.8
comp100696_c0	22.76	21.53	16.13	20	15.67	18.88	21.44	19.85	18.08
comp100697_c0	6.67	2.39	2.4	8.02	2.66	5.31	4.23	4.36	4.72
comp100698_c0	0.79	0.72	2	0.89	1.42	0	0.21	0.19	0
comp100698_c1	4.05	3.71	3.11	3.44	2.53	3.22	2.33	2.44	2.11
comp100699_c0	29.55	36.2	26.67	26.2	30.83	33	30.6	30.61	34.05
comp100699_c1	0.51	0.23	0.39	0.29	0.82	0.68	0.69	0	0.47
comp100700_c0	5.39	7.55	4.52	8.25	7.09	6.01	10.36	9.36	8.8
comp100701_c0	5.06	6.95	6.46	1.28	8.07	1.08	6.68	9.24	7.04
comp100702_c1	24.19	31.91	31.04	16.26	21.11	16.24	12.86	15.18	16.47
comp100703_c1	33.12	34.5	31.21	34.45	37.7	32.55	30.53	36.91	29.3
comp100703_c3	0.38	0	0	1.07	0	0	0.4	0.54	0
comp100703_c4	11.69	12.82	7.18	9.35	9.07	8.1	8.79	8.45	12.88
comp100703_c5	0	0	0	0	0.53	0	0	0	0
comp100704_c0	1.09	1.74	2.91	1.53	3.12	2.16	4.17	2.75	2.97
comp100704_c1	18.28	24	15.04	19.39	16.76	24.47	27.52	22.89	28.32
comp100705_c0	171.85	126.55	94.63	147.55	116.26	153.91	167.79	154.06	151.92
comp100706_c0	48.58	35.63	41.26	38.73	30.29	45.86	39.9	41.19	35.78
comp100707_c0	16.27	15.52	14.09	16.82	13.94	14.36	11.17	9.59	7.77
comp100708_c0	4.97	4.1	3.16	0.54	0.25	0.25	1.25	1.15	0.66
comp100709_c0	0	0	0.8	0.36	0.35	0.34	0.67	1.2	0.96
comp100709_c1	0.89	0.73	0.61	0.67	0.09	0.42	1.05	1.64	0.36
comp100709_c2	6.48	4.49	3.35	4.44	2.71	4.28	4.79	4.09	4.05
comp100710_c0	2.45	4.72	5.84	3.07	4.82	4.71	3.24	3.32	3.47
comp100711_c0	0.57	1.51	0.37	1.03	0.35	2.42	0.77	0.87	0.44
comp100711_c1	23.14	26.86	19.48	24.46	18.04	25.17	29.91	26.42	30.19
comp100712_c0	8.25	10.45	9.83	7.37	8.24	8.65	8.12	10.25	11.49
comp100713_c0	33.48	40.11	36.56	31.53	37.19	37.85	46.13	47.3	49.36
comp100714_c0	19.55	24.36	19.86	19.11	16.38	19.76	22.34	24.2	23.61
comp100715_c0	3.51	3.75	3.02	4.78	5.34	4.32	6.41	7.49	5.94
comp100716_c0	1.13	2.05	1.79	1.26	1.11	1.21	1.17	1.31	1.26
comp100717_c0	0.22	0.52	0.46	0	0.21	0.36	1.19	1.42	0.68
comp100717_c1	17.17	20.51	19.59	26.3	22.69	24.7	23.71	20.99	22.51
comp100718_c0	16.78	33.21	27.59	18.96	26	15.82	13.65	16.6	15.93
comp100719_c0	2.28	1.48	2.83	0.61	0.36	0.24	0.29	0.42	0.05
comp100719_c1	307.5	352.66	363.37	144.11	194.33	178.81	120.22	124.56	124.88
comp100720_c2	23.87	23.69	18.47	16.36	19.02	21.24	25.7	27.25	26.13
comp100721_c0	3.24	3.52	4.71	4.36	6.67	5.74	5.61	7.44	6.14
comp100722_c0	8.13	9.72	12.67	11.14	11.83	12.73	12.45	11.07	10.34
comp100723_c0	6.68	5.8	7.12	5.07	4.61	5.75	6.68	6.44	6.8
comp100724_c0	45.43	42.77	32.94	24.64	22.99	32.11	41.17	43.58	44.67
comp100724_c1	0.51	0.15	0.34	0.19	0.15	0.18	0.18	0	0.82
comp100724_c2	0	0	0.26	0	0	0	0.26	0	0
comp100725_c0	0	0	0	0	0	0	0	0.26	1.36
comp100725_c1	0	0	0	0	0.21	0	0.25	0.44	1.16
comp100725_c2	15.87	14.36	11.24	9.21	13.89	8.52	16.86	15.29	14.61
comp100725_c3	0.92	0.71	0.5	1.39	0.4	0.77	0.77	1.25	0.53
comp100726_c0	14.16	9.35	10.68	3.09	2.16	3.43	6.56	5.89	6.11
comp100727_c0	1.28	1.66	3.05	0.69	0.72	0.72	0.85	0.72	0.53
comp100727_c1	43.04	65.18	67.19	29.61	22.99	16.61	31.19	38.68	20.11
comp100728_c0	13.36	20.91	14.05	4.28	3.7	2.66	4.58	4.45	3.4
comp100728_c1	7.31	12.18	11.48	2.11	3.97	1.38	2.62	2.93	2.57
comp100729_c0	49.46	46.69	37.76	33.77	26.68	40.38	40.78	40.08	44.41
comp100730_c0	14.12	12.91	10.61	13.38	11.44	13.89	18.01	16.07	18.63
comp100731_c0	307.92	334.5	328.63	303.49	398.38	305.45	289.01	286.88	293.13
comp100732_c0	63.68	52.44	63.85	67.89	53.31	94.57	70.72	63.78	64.47
comp100733_c0	31.23	20.86	26.32	57.94	32.57	29.7	56.37	54.78	49.12
comp100733_c2	0	0	0	0.89	0	0	0	0	0
comp100734_c0	21.06	21.34	19.51	20.77	21.01	25.06	29.88	24.65	26.62
comp100735_c0	0.8	0.9	0.73	0.59	0.61	0.48	0.63	0.78	0.88
comp100736_c0	11.26	8.18	9.77	9.18	7.3	11.61	12.94	12.12	10.54
comp100737_c0	0.66	1.26	0.44	0.48	1.4	0.7	1.22	0.64	1.8
comp100737_c1	15.9	12.42	13.28	14.78	13.33	13.59	18.01	21.27	23.22
comp100738_c0	0	1.1	1.05	0.51	0	24.59	0.1	0.36	0.23
comp100738_c1	0.1	1.91	1.96	1.04	0.65	31.15	0.07	1.46	1.79
comp100739_c1	39.93	22.09	11.84	64.75	56.03	66.66	58.06	61.17	62.81
comp100740_c0	81.78	119.33	111.74	207.63	80.86	232.6	136.72	150.97	177.83
comp100741_c0	25.15	24.27	23.16	16.11	18.4	16.46	15.73	18.13	16.56
comp100742_c1	6.14	5.21	4.96	5.88	5.37	5.56	5.61	6.53	5.57
comp100743_c1	5.27	6.31	3.9	5.52	4.09	6.97	5.55	6.72	5.07
comp100743_c2	3.18	3.09	1.63	1.63	1.5	0.85	1.41	3.15	3.09
comp100744_c0	6.99	9.18	14.38	4.96	3.04	12.72	7.25	10	8.88
comp100745_c0	1.62	2.57	2.46	2.92	3.54	3.65	3.49	3.67	2.98
comp100746_c0	19.53	14.66	13.77	14.36	13.06	16.43	13.58	15.38	16.03
comp100747_c0	9.07	10.06	11.42	12.29	12.7	12.73	16.36	17.52	18.26
comp100748_c0	7.66	7.59	7.77	7.89	7.54	5.84	8.17	9.26	8.85
comp100749_c0	40.15	50.47	47.54	85.51	99.13	84.27	82.56	83.84	82.4
comp100749_c1	0.71	0.65	1.21	0.32	0.13	0.51	1.53	1.01	0.17
comp100750_c0	7.34	7.28	8.37	9.97	6.35	10.82	16.31	12.97	13.09
comp100751_c0	18.5	19.82	16.34	21.81	20.1	21.26	20.88	18.23	21.67
comp100752_c0	5.69	6.18	4.72	4.83	3.85	5.39	5.06	5.79	5.4
comp100753_c0	8.71	3.61	4.68	7.47	4.11	15.45	6.74	5.96	6.17
comp100754_c0	2.72	0.28	1.88	3.88	2.45	1.42	1.46	1.31	2.36
comp100754_c1	1.05	0.49	1.15	0.52	0.44	0.63	0.28	0.59	1.05
comp100754_c2	8.22	8.79	7.12	6.99	9.01	9.82	12.37	12.63	12.3
comp100754_c3	1	2.26	1.54	1.47	1.89	1.16	0.91	1.1	1.53
comp100755_c1	1.61	2.25	1.89	2.16	1.44	6.38	2.09	2.27	2.59
comp100755_c3	0	0	0	0.51	0	0	0	0	0
comp100756_c0	6.37	6.44	5.52	5.62	7.02	6.19	5.82	6.47	7.43
comp100757_c0	21.4	17.22	16.72	9.63	13.71	14.31	21.37	21.52	19.13
comp100758_c0	39.93	41.27	33.64	39.38	30.61	38.83	45.76	48.67	53.9
comp100759_c0	1.11	0.2	0.45	0	0.4	0.24	0	1.44	0
comp100759_c1	0.78	1.2	1.43	1.7	1.61	1.97	3.28	2.96	5.95
comp100759_c2	3.74	4.12	3.58	3.8	5.27	5.49	5.56	4.28	7.2
comp100760_c0	24.26	27.44	26.66	30.99	25.38	32.15	31.4	33.29	27.03
comp100761_c0	52.01	43.96	37.3	56.45	38.05	39.81	68.89	63.73	57.3
comp100762_c0	31.54	27.34	34.31	24.62	23.8	19.27	27.93	24.08	22.85
comp100762_c1	0.45	1.81	0.44	0.84	0.53	0.15	0.47	0.27	1.74
comp100763_c0	16.35	10.73	9.41	10.58	5.84	11.41	9.44	7.1	9.15
comp100764_c0	6.82	6.78	6.09	2	3.66	1.82	5.5	5.09	5.08
comp100764_c1	13.38	15.29	9.82	20.42	10.17	14.26	15.1	14.95	13.63
comp100764_c2	10.87	8.99	10.13	14.4	12.15	16.35	18.11	17.54	19.83
comp100765_c0	53.16	51.13	34.22	31.6	27.66	36.68	49.57	40.55	44.95
comp100765_c1	20.27	18.13	16.04	14.23	12.33	12.05	14.99	14.6	12.85
comp100766_c0	3.51	4.72	3.36	2.76	3.03	2.93	5.24	3.65	5.38
comp100767_c0	9.57	9.85	9.01	14.57	11.29	14.27	14.76	18.77	11.64
comp100768_c0	69.16	37.93	55.22	12.73	27.84	18.54	11.72	11.42	17.16
comp100769_c0	38.08	46.24	33.43	28.08	27.32	41.3	40.21	39.22	37.08
comp100770_c0	1.29	0.95	1.27	12.69	14.13	11.35	11.06	10.07	12.83
comp100770_c3	8.71	8.71	7.31	15.29	13.02	14.19	15.59	13.98	13.68
comp100771_c0	1.52	2.72	2.55	1.44	1.62	1.97	2.58	2.17	2.34
comp100771_c1	81.01	93.02	74.75	50.22	46.5	54.4	72.92	82.82	72.66
comp100772_c0	4.28	3.22	1.92	1.62	1.08	1.77	1.91	0.88	1.31
comp100773_c0	2.72	0.4	0.72	1.09	0.9	1.96	1.5	1.99	0
comp100773_c1	9.79	11.95	9.28	8.38	7.87	10.21	12.28	9.51	13.23
comp100774_c0	13.89	4.31	11.62	7.28	9.61	12.24	7.73	8.94	11.77
comp100775_c0	52.21	47.37	37.84	51.07	38.44	52.66	62.24	56.63	61.03
comp100776_c0	20.35	17.62	18.14	12.34	13.72	13.68	14	15.13	12.87
comp100777_c0	0.51	0.74	0.45	0.49	0.34	1.15	1.32	0.93	0
comp100777_c1	9.49	8.41	10.5	11.36	14.14	10.36	15.8	14.64	15.19
comp100778_c0	30.6	28.55	22.8	13.09	12.23	15.15	18.59	18.31	17.95
comp100779_c0	6.33	2.5	2.06	1.95	2.72	3.73	6.26	5.86	7.28
comp100779_c1	349.34	297.04	454.69	492.71	625.22	326.77	428.03	525.96	317.74
comp100780_c0	49.69	53.25	38.49	57.69	44.92	54.2	57.38	58.47	54.66
comp100781_c0	80.36	48.86	58.84	42.02	33.08	53.5	33.02	41.14	37.75
comp100782_c0	4.69	5	4.21	2.73	2.58	2.42	2.37	2.97	3.85
comp100783_c0	18.51	18.02	15.45	5.14	1.95	7	7.66	7.31	5.48
comp100784_c0	29.72	31.49	22.32	24.02	21.01	29.53	30.99	30.72	28.42
comp100784_c1	71.88	82.3	65.71	73.02	59.43	68.91	79.27	70.19	75.19
comp100784_c2	0	0	0.57	0	0	0	0	0.51	0
comp100785_c0	49.4	37.33	33.3	34.99	25.7	36.87	41.18	36.26	38.32
comp100786_c0	7.91	8.21	10.36	9.83	10.26	9.58	7.46	5.79	6.07
comp100787_c0	0.7	1.31	0.82	1.06	0.87	1.65	3.22	2.45	3.15
comp100787_c1	0.47	0.92	0.34	0.76	1.35	1.12	1.02	2.04	2.03
comp100787_c2	1.84	2.1	1.84	2.26	3.24	3.65	3.84	5.13	4.73
comp100788_c0	4.28	4.58	4.75	8.32	6.68	8	7.18	7.32	5.99
comp100789_c0	102.95	214.41	119.89	180.38	241.64	170.9	159.81	177.32	178.9
comp100789_c1	0.9	1.54	1.72	1.46	1.31	1.24	0.55	1.12	3.14
comp10078_c0	0	0.61	0	0.25	0	0.71	0.23	0.21	0.53
comp100790_c0	2.24	2.18	2.57	4.84	3.38	4.26	3.97	4.6	2.31
comp100791_c0	37.92	37.22	31.08	26.71	19.72	27.77	31.12	29.5	30.94
comp100792_c1	0	0	0	0	0.23	0.27	0	0	0
comp100792_c2	38.31	39.35	39.8	21.02	16.87	19.79	28.6	28.57	22.55
comp100793_c0	59.9	68.97	63.64	45.44	47.68	50.53	36.83	38.92	39.22
comp100794_c0	40.3	35.05	31.52	29.71	23.32	27.05	31.8	26.48	31.95
comp100795_c0	4.21	4.29	3.84	3.67	1.86	4.54	4.7	4.5	5.06
comp100796_c0	53.8	45.26	47.7	31.52	33.59	31.91	36.08	33.21	31.69
comp100797_c0	12.12	16.82	12.08	16.35	8.78	29.16	17.78	21.06	21.34
comp100798_c0	3.06	1.32	1.29	0.9	0.97	1.86	0.99	2.12	1.82
comp100798_c1	0.73	0.89	0.91	0.46	0.23	0.17	1.47	0.64	0.69
comp100798_c2	2.53	2.33	1.52	0.81	1.81	1.42	1.89	2.63	2.33
comp100799_c0	7.92	7.06	7.25	12.92	11.91	10.9	13.54	15.67	10.04
comp100799_c1	18.9	17.52	21.13	17.96	24.52	19.45	22.33	22.72	23.3
comp100800_c0	0	0	0	0.26	0	0.5	0	0	1.41
comp100800_c1	20.55	15.96	12.06	17.15	12.13	19.96	20.11	15.09	18.75
comp100801_c1	0.39	1.07	0.2	0.22	1.06	0	0.62	0.55	0.47
comp100801_c2	16.3	11.69	8.29	14.07	10.46	13.42	20.22	18.05	14.63
comp100802_c0	12.75	12.47	10.99	10.77	10.07	12.18	15.99	12.84	12.79
comp100803_c0	26.95	27.28	24.63	25.49	25.28	23.86	36.8	34.06	28.23
comp100804_c0	6.64	2.94	5.5	1.9	3.64	2.83	4.96	2.83	5.53
comp100805_c0	5.85	4.09	5.17	6.36	5.11	6.02	5.66	5.25	4.79
comp100806_c0	24.55	17.38	26.2	6.71	8.47	7.9	6.94	7.38	8.29
comp100807_c0	38.47	37.68	26.09	24.13	18.25	27.44	31.24	24.98	28.64
comp100808_c0	12.37	13.94	11.33	8.28	9.24	12.65	14.95	12.93	15.03
comp100809_c0	42.3	50.23	51.09	44.62	45.66	47.23	47.81	48.21	40.42
comp100810_c0	0.45	1.02	1.14	0.5	0.21	0.35	1.66	0.98	1.22
comp100810_c1	1.98	1.77	1.62	1.31	1.93	1.86	2.61	1.7	1.11
comp100811_c0	41.97	43.95	40.6	40.15	40.17	42.48	56.38	51.08	51.85
comp100812_c0	2.91	4.42	3.4	5.18	2.66	4.25	5.56	6.61	2.98
comp100812_c1	42.5	44.65	37.4	38.63	35.75	43.8	49.35	46.91	45.92
comp100812_c2	3.66	4.36	3.46	6.4	5.16	4.73	5.78	4.6	4.25
comp100813_c0	24.03	23.09	19.78	21.43	16.18	24.95	26.73	30.2	32.5
comp100814_c0	2.32	2.3	1.39	2.12	1.5	2.44	2.2	3.15	2.29
comp100815_c0	8.76	8.59	7.45	13.14	12.34	13.77	15.41	16.37	17.62
comp100816_c0	0.37	0.41	0.78	0.25	0.9	0.42	1.03	1.24	0.85
comp100816_c1	16.03	16.45	13.16	15.29	9.59	17.81	22.57	18.18	20.04
comp100817_c0	75.7	63.97	73.82	54.34	62.82	57.07	69.29	72.32	75.4
comp100817_c1	0	0	0	1.69	0.76	0.78	0	0	0
comp100818_c0	16.38	14.97	16.69	16.98	14.73	14.41	19.05	17.74	19.22
comp100819_c0	27.01	27.4	25.51	33.27	31.73	31	36.87	39.68	32.8
comp100820_c0	4.18	5.41	4.13	6.01	5.62	5.28	7.73	6.82	7.13
comp100820_c1	3.32	3.04	4.44	4.17	4.73	3.86	5.29	5.18	6.25
comp100821_c0	53.07	37.23	32.27	35.2	28.8	38.14	42.77	40.99	45.31
comp100822_c0	16.84	17.1	19.93	23.38	31.91	20.17	23.4	22.75	22.77
comp100823_c0	16.64	10.37	7.88	8.46	1.74	3.79	11.32	10.01	9.3
comp100823_c2	44.8	28.8	24.31	22.02	15.31	22.07	22.15	23.5	25.14
comp100824_c0	17.96	17.5	17.44	19.95	18.62	19.33	21.6	21.67	21.13
comp100825_c0	67.01	37.44	40.83	2.92	4.32	6.18	5.14	3.93	5.28
comp100826_c0	0	1.14	0.42	0.23	0	0	0	0.39	0
comp100826_c1	0.11	0	0.43	0.48	1.08	0	0.11	0.31	0.64
comp100826_c2	0.86	0.82	2.42	1.85	2.24	2.24	1.75	2	1.59
comp100827_c0	3.43	2.87	3.02	2.28	2.49	2.42	3.71	2.94	3.06
comp100828_c0	69.19	69.93	122.46	36	55.52	36.84	24.19	28.77	23.02
comp100829_c0	20.88	31.62	28.95	9.28	12.88	9.66	14.79	11.23	11.89
comp100830_c0	5.9	4.41	5.11	5.4	5.22	5.23	4.95	5.33	5.47
comp100831_c0	122.99	117.84	105.99	116.83	96.27	109.84	153.98	135.69	146.8
comp100832_c0	3.18	2.95	3.22	4.66	3.83	4.08	6.52	6.86	7.8
comp100833_c0	30.49	31.4	30.09	39.21	38.28	39.68	40.1	35.71	38.34
comp100834_c0	22.8	19.6	16.45	23.19	21.29	23.12	27.66	28.44	27.48
comp100835_c0	24.95	24.99	24.62	26.11	25.59	23.24	25.93	28.22	32.7
comp100836_c0	41.05	38.36	31.49	46.92	34.86	42.98	53.78	45.44	49.54
comp100837_c1	9.61	6.68	7.76	6.1	5.61	7.92	8.2	9.23	10.23
comp100837_c2	3.68	3.43	3.33	4.57	3.73	4.54	3.99	4.38	4.83
comp100838_c0	22.24	19.19	15.53	21.32	16.53	16.65	22.45	19.89	23.41
comp100839_c0	34.97	44.22	37.61	39.86	49.66	38.87	39.59	31.16	32.53
comp100840_c0	12.1	26.76	15.99	65.45	77.93	61.13	44.54	61.39	52.83
comp100841_c0	1.88	1.55	1.09	2.16	1.34	1.76	1.9	1.26	1.23
comp100842_c0	157.02	161.58	135.23	138.25	104.49	122	154.86	152.79	141.08
comp100843_c0	104.27	58.47	54.81	44.17	32.43	55.78	46.41	42.45	49.34
comp100843_c1	32.44	21.14	18.82	9.81	9.7	16.94	12.92	12.79	14.26
comp100844_c0	5.97	7.36	6.65	8.65	10.3	7.89	8.51	8.09	7.18
comp100845_c0	19.82	20.36	23.41	20.42	21.8	18.15	19.77	18.28	19.39
comp100846_c0	11.93	12.25	13.56	3.17	4.81	5.27	4.36	3.87	4.09
comp100846_c1	8.54	11.01	12.42	2.21	2.42	3.37	3.32	2.47	4.02
comp100847_c0	5.23	4.31	4.03	5.91	8.81	9.35	12.54	9.73	11.02
comp100848_c0	66.29	67.94	50.25	52.16	41.79	54.55	64.9	59.3	62.09
comp100849_c0	24.57	17.16	31.19	7.9	7.56	7.05	9.27	11.4	7.9
comp100850_c0	2.11	1.69	1.79	1.29	1.15	1.52	2.5	1.68	2.49
comp100851_c0	9.05	5.71	5.05	4.85	3.24	4.72	5.08	6.28	5.18
comp100852_c0	60.25	47.14	40.18	37.43	32.74	48	51.54	49.22	46.74
comp100853_c0	0	1.18	1.53	0.73	0.39	1.15	0.9	0.8	1.82
comp100853_c1	212.09	280.42	240.3	294.89	308.23	271.65	230.23	240.3	242.7
comp100854_c0	10.92	8.74	6.75	8.23	5.6	10.52	12.64	10.52	9.29
comp100855_c0	8.21	6.49	5.98	13.14	6.02	17.37	13.25	12.38	12.69
comp100856_c0	42.67	45.98	47.36	106.33	108.04	91.44	92.89	99.94	88.96
comp100857_c0	35.93	43.87	35.45	43.93	37.51	43.33	40.21	38.21	42.02
comp100858_c0	22.42	19.7	18.19	18.37	17.4	22.2	27.74	21.01	18.89
comp100859_c1	1.29	1.63	1.08	2.33	1.69	2.68	1.83	2.59	3.32
comp100859_c2	0.85	0.97	0.83	2.34	0.76	0.8	2.43	1.16	2.89
comp100859_c3	0.79	0.24	1.07	1.96	0.99	0.95	2.05	2.21	1.04
comp100859_c4	0.58	0.18	0.2	1.31	0	0	0.61	0.18	0.47
comp100860_c0	3.62	4.84	5.9	3.89	5.37	4.37	6.6	5.1	4.53
comp100861_c0	11.03	9.76	10.77	13.91	13.33	20.01	16.31	16.66	17.93
comp100862_c0	1.13	1.44	1.48	2.37	3.94	4.23	1.77	1.28	2.09
comp100863_c0	14.39	8.99	9.44	4.26	2.14	3.76	4.21	3.55	2.58
comp100864_c0	30.14	43	36.29	30.3	28.14	31.55	31.62	30.3	30.5
comp100865_c0	4.15	5.61	6.44	4.72	5.11	4.39	6.47	5.44	5.19
comp100866_c0	2.31	3.47	1.73	1.82	1.29	2.91	3.7	3.34	3.97
comp100867_c0	28.55	30.68	33.39	13.45	26.67	15.03	23.05	20.17	19.31
comp100868_c0	8.21	7.07	7.03	6.66	5.81	7.32	8.07	7.69	8.27
comp100869_c0	3.35	3.05	3.52	3.98	4.37	3.44	2.87	4.43	3.2
comp100870_c0	14.42	12.04	9.87	14.19	11.5	13.46	19.21	15.71	16.49
comp100871_c0	7.74	6.23	16.61	5.97	2.54	3.98	6.64	5.23	4.36
comp100871_c1	15.81	8.73	34.67	12	13.48	11.55	11.57	9.67	10.47
comp100872_c1	24.8	24.79	27.27	51.42	61.2	51.64	37.9	45.89	39.25
comp100873_c0	0	1.02	0.28	0.16	0	0.3	0.15	0	2.2
comp100873_c1	4.45	4.42	4.52	2.82	2.2	3.24	4.34	6.87	4.45
comp100874_c0	4.54	8.46	4.77	11.59	8.76	12.22	7.09	6.53	10.05
comp100875_c0	2.2	1.97	2.36	1.39	1.56	1.64	2.1	2.04	2.54
comp100876_c0	36.11	34.27	30.68	19.66	16.74	13.95	21.15	21.14	18.98
comp100876_c1	1.07	0.98	0.36	0.67	0.11	0	1.77	0.23	1.3
comp100877_c0	16.72	5.89	7.32	6.43	5.24	6.46	5.26	3.09	4.81
comp100878_c0	24.92	17.47	20.47	22.16	21.8	20.13	23.17	22.07	21.27
comp100879_c0	11.32	6.65	10.47	8.29	7.77	8.32	8.1	8.42	8.79
comp100880_c0	332.17	205.86	358.56	187.64	113.77	166.8	114.48	118.33	100.86
comp100881_c0	67.79	63.37	56.48	49.75	53.08	58.73	80.09	63.37	76.84
comp100882_c0	7.93	7.18	9.46	6.06	6.81	6.94	7.82	7.46	7.05
comp100883_c0	0.69	0.4	0.97	0.59	0.81	0.92	1.01	0.77	0.21
comp100883_c1	0.97	1.44	1.94	0.98	0.82	1.15	1.04	2.05	1.91
comp100883_c2	1.81	3.13	1.43	2.37	2.13	1.93	2.67	2.31	2.64
comp100884_c0	2.75	2.82	4.75	2.67	3.35	4.35	2.76	2.44	2.79
comp100885_c0	58.06	39.04	49.94	25.18	26.59	30.46	36.67	30.2	35.24
comp100886_c0	0.92	0.54	0.26	0.76	0.86	0.89	1.52	0.74	2.14
comp100886_c1	84.41	72.64	45.69	48.84	43.73	59.35	91.87	81.53	75.33
comp100886_c2	17.03	13.46	8.55	7.89	8.49	6.72	18.6	16.55	16.45
comp100886_c3	0.86	0.91	0.25	0.14	0	0.14	1.31	0.72	1.05
comp100886_c4	6.49	4.62	3.71	2.61	5	2.72	7.98	6.89	6.89
comp100886_c5	0	0	0	0	0	0	0	0.7	0
comp100886_c6	2.51	1.09	1.36	0.71	0.66	1.26	1.05	1.73	0.77
comp100887_c0	7.23	3.94	5.91	7.28	7.3	7.65	7.39	7.79	9.19
comp100888_c0	2.1	2.93	2.44	2.34	1.6	2.5	2.77	3.41	3.47
comp100889_c0	196.47	126.13	95.89	121.03	59.81	80.8	111.66	94.09	99.31
comp100890_c0	2.63	2.66	1.94	2.27	1.12	1.46	2.63	2.41	2.82
comp100891_c0	11.06	11.12	22.21	24.63	31.81	21.21	14.29	20.05	12.83
comp100892_c0	75.11	84.68	81.16	21.25	17.7	24.94	31.34	28.34	27.87
comp100893_c0	10.96	11.58	9.38	20.39	19.48	22.54	22.59	25.66	24
comp100894_c0	19.71	22.97	28.89	32.95	34.08	41.89	30.1	26.98	33.23
comp100895_c0	37.11	35.25	37.32	125.19	101.02	124.54	128.13	138.41	125.49
comp100896_c0	9.88	8.16	15.54	5.85	7.1	6.47	5.03	6.06	4.65
comp100897_c0	12.02	14.31	14.66	12.24	11.9	13.89	21.66	16.93	16.7
comp100898_c0	8.78	8.27	8.14	19.36	14.41	13.79	12.86	14.91	14.76
comp100899_c0	1.57	1.61	2.37	1.82	1.99	1.77	1.23	2.3	1.52
comp100899_c1	4.16	5.06	3.63	1.86	1.79	2.07	2.6	4.27	2.21
comp100899_c2	0.49	0.89	0.17	0.73	0.59	0.17	0.51	0	0
comp100899_c3	0.77	0.71	1.86	1.11	1.12	0.22	0.37	0.55	0.94
comp100900_c0	19.87	16.39	15.78	19.09	8.53	20.37	17.99	20.22	17.71
comp100901_c0	10.3	6.22	8.06	3.89	9.1	3.81	4.15	3.2	2.3
comp100902_c0	15.64	5.1	6.4	11.1	6.66	8.12	15.49	13.13	14.5
comp100903_c0	9.33	9.65	8	10.94	9	11.28	14.26	12.94	13.53
comp100904_c0	29.57	23.32	20.22	22.68	21.87	24.22	29.14	26.1	27.56
comp100905_c0	6.28	7.19	6.63	4.17	7.32	4.95	7.65	9.65	9.97
comp100906_c0	16.79	12.29	8.49	5.85	5.01	5.72	5.24	4.6	4.36
comp100907_c0	2.45	2.81	2.09	1.87	1.83	3.22	5.4	3.27	5.12
comp100908_c0	2.1	1.35	1.78	2.59	0.77	1.07	1.07	1.17	0.78
comp100908_c2	7.17	5.12	1.6	6.49	3.97	6.5	3.86	5.3	4.44
comp100908_c3	225.73	255.46	242.41	151.05	147.84	179.41	241.17	252.9	236.11
comp100908_c4	143.84	124.06	128.67	107.59	100.95	99.57	145.13	147.56	136.06
comp100908_c5	50.18	32.88	56.76	43.85	50.77	30.51	52.52	59.64	55.24
comp100909_c1	8.25	9.44	6	5.75	6.56	7.73	10.65	8.03	9.94
comp100910_c0	8.04	5.56	10.16	12.4	8.01	14.05	17.16	16.1	14.46
comp100911_c0	74.73	72.14	146.77	91.43	167.56	102.03	69.49	76.26	76.73
comp100912_c0	71.88	66.25	45.2	53.23	47.02	65.69	82.5	66.35	75.96
comp100913_c0	21.92	29.86	33.04	32.37	39.37	34.15	37.63	42.58	37.08
comp100913_c1	0.22	0.82	0.69	0	0.31	0.12	0	0	0
comp100913_c2	1.56	1.56	2.91	3.47	2.01	1.64	2.95	2.01	2.76
comp100913_c3	0	0	0	0	0.22	0	0	0	0
comp100913_c4	0.22	0.6	0	1.1	0.91	1.15	0	0.63	0.13
comp100913_c5	2.76	1.27	3.17	5.62	4.12	3.28	4.95	7.38	6.15
comp100913_c6	0.24	0.22	0.49	0	0	0	0.51	1.12	0
comp100913_c7	0	0.48	1.71	1.19	1.89	0.65	0	0.17	0.32
comp100914_c0	119.4	91.29	87.02	129.36	85.45	124.72	95.59	84.54	84.97
comp100915_c0	41.34	35.89	38.51	29.22	32.46	34.89	33.87	32.1	40.15
comp100916_c0	4.67	7.68	6.99	4.96	4.98	5.58	7.26	6.83	5.35
comp100917_c0	15.17	12.85	13.37	14.59	13.22	12.55	15.18	14.56	14.28
comp100918_c0	1.75	1.26	1.07	2.5	1.19	2.17	1.5	2.2	1.57
comp100919_c0	12.87	17.93	18.78	3.1	3.74	5.55	3.69	3.75	5.18
comp100920_c0	27.23	26.67	21.76	21.66	20.56	25.99	24.88	19.22	25.4
comp100921_c0	3.75	2.49	4.7	3.79	4.35	3.5	8.27	7.53	8.81
comp100922_c0	4.84	5.22	9.65	12.83	6.09	13.35	8.28	9.93	8.7
comp100923_c0	0.97	1.16	0.49	0.88	0.29	1.12	1.17	1.25	1.42
comp100923_c1	0	0	0	1.52	1.77	2.86	0	0	0
comp100923_c2	19.17	19.68	16.22	17.14	10.06	22.16	15.63	17.7	17.89
comp100923_c3	0	0	0	1.8	0.54	0.64	0	0	0
comp100923_c5	0.54	0	0	0.2	0.16	1.96	0	0	0
comp100924_c0	129.43	98.5	86.5	160.98	113.25	176.17	183.7	176.78	165.65
comp100925_c0	5.54	3.88	3.19	2.4	2.19	3.84	3.72	4.16	5.02
comp100926_c0	49.85	49.17	46.06	31.87	31.66	37.82	35.69	32.82	25.15
comp100926_c1	0	0	0	0	0.23	0	0	0	0
comp100927_c0	20.85	12.23	15.46	15.11	14.53	17.85	16.73	17.04	18.61
comp100928_c0	6.83	6.67	6.22	9.93	10.9	11.02	14.23	13.29	12.35
comp100929_c0	34.83	21.27	22.07	27.7	31.88	30.08	32.37	29.01	29.23
comp100930_c0	6.99	4.45	5.56	7.75	8.84	9.6	4.14	5.9	5.15
comp100931_c0	6.96	6.79	5.47	13.02	10.89	12.39	7.62	11.51	6.88
comp100932_c0	32.6	35.15	26.91	25.01	20.4	26.9	30.48	27.13	26.46
comp100933_c0	18.8	15.45	15.86	17.02	15.18	15.01	19.38	18.52	18.22
comp100934_c0	596.9	696.19	728.24	352.61	362.09	563.87	560.68	529.02	636.42
comp100935_c0	34.78	31.15	36.28	42.3	35.98	46.16	45.56	48.81	42.14
comp100936_c0	2.21	1.24	1.3	1.34	1.18	1.09	1.18	1.48	0.39
comp100936_c1	4.17	1.78	2.57	2.71	1.7	2.8	2.15	2.65	2.96
comp100937_c0	12.2	9.89	18.21	5.45	11.28	7.62	4.25	4.74	4.67
comp100938_c0	0	0.53	0	0.04	0.51	0.31	0.6	0.26	0
comp100938_c1	11.68	10.87	12.6	20.75	21.22	20.84	16.06	16.42	13.77
comp100939_c0	6.44	5.15	7.16	6.23	8.09	8.62	8.55	9.47	10.62
comp100940_c0	7.86	5.69	6.07	6.81	6.94	5.05	6.98	8.07	6.91
comp100941_c0	13.34	8.31	9.69	14.39	13.56	13.36	14.41	16.56	16.89
comp100942_c0	10.55	6.23	7.26	9.65	7.05	15.65	9.96	8.17	10.35
comp100943_c1	6.56	4.62	5.07	5.76	2.9	5.08	8.59	6.76	4.37
comp100944_c0	1.7	1.24	0.79	0.82	0.81	1	0.96	0.94	0.71
comp100944_c1	15.14	16.41	14.32	15.47	18.26	18.43	25.12	23.42	19.77
comp100945_c0	0.84	1.26	0.25	1.24	0.78	1.34	1.35	0.71	0.65
comp100945_c1	1.19	1.41	1.52	1.86	1.59	2.15	0.96	1.57	1.53
comp100946_c0	1.71	2.24	2.12	1.28	1.34	2.29	1.78	1.1	2.05
comp100947_c0	7.56	8.14	4.36	4.73	3.04	5.37	5.26	5.67	4.76
comp100948_c0	6.54	7.13	4.7	5.43	6.21	6.2	6.91	6.87	4.63
comp100948_c1	2.64	2.98	2.36	3.12	2.49	3.24	3	4.19	3.67
comp100948_c2	0.13	0.74	0.68	0	0.12	0.43	0.57	0	0.16
comp100949_c0	50.84	41.46	44.82	37.7	38.95	52.11	34.61	37.81	37.03
comp100950_c0	52.87	41.51	36.78	53.55	52.64	70.37	67.17	53.35	62.35
comp100951_c0	23.93	31.61	23.21	15.03	19.97	12.54	14.81	20.17	13.58
comp100952_c0	0.39	1.67	0.53	0.29	0.48	0.69	0	0.25	0.16
comp100952_c1	12.55	14.93	12.76	12.32	10.38	11.13	17.19	14.2	13.7
comp100952_c2	0	1.34	0.25	0	0.65	0.26	0	0	0
comp100953_c0	2.92	4.37	2.8	3.26	2.8	3	3.89	3.9	4.6
comp100954_c0	3.64	3.06	3.61	4.81	4.67	5.23	4.1	3.78	4.26
comp100955_c0	1.17	0.66	0.77	1.42	1.13	1.23	1.16	1.35	1.41
comp100955_c1	65.98	64.82	54.89	53.39	49.14	58.25	77.91	68.98	80.94
comp100956_c1	35.27	41.38	30.84	33.85	36.67	43.8	56.81	53.98	56.18
comp100957_c0	11.81	7.43	8.65	6.93	5.95	7.71	9.21	9.38	9.03
comp100958_c0	1.03	1.25	2.61	1.47	2.65	0.73	0.18	0.81	0.41
comp100958_c1	1.66	1.74	1.31	1.07	0.94	0.84	0.36	1.88	0.14
comp100958_c2	38.06	47.54	30.83	32.99	26.71	30.26	43.64	38.66	41.36
comp100959_c0	12.02	12.95	6.37	8.55	8.54	12	13.92	13.47	14.39
comp100960_c0	4.58	6.37	8.03	9.61	9.43	7.33	15.06	17	15.01
comp100961_c0	11.29	8.52	7.91	7.56	8.5	8.22	11.09	11.77	9.38
comp100962_c0	6.62	5.15	5.72	6.05	5.5	5.6	7.93	7.07	6.29
comp100963_c1	38.82	35.57	25.65	20.41	18.08	18.76	41.13	36.23	38.4
comp100963_c2	40.6	27	12.72	22.96	9.52	31.64	35.15	22.3	31.94
comp100964_c0	11.24	12.76	14.37	15.2	11.94	12.17	15.19	11.84	15.36
comp100964_c1	1.24	1.43	0.56	1.06	1.07	2.18	1.75	1.09	1.67
comp100965_c0	14.91	14.93	14.1	12.47	11.04	13.75	17.15	18.25	17.78
comp100965_c1	0	0	0	0	0	0	0.64	0	0.74
comp100966_c0	41.35	18.72	18.14	22.02	23.31	13.9	35.57	27.45	24.64
comp100967_c0	0	0	0	0.3	0	0	0	0	0
comp100967_c1	0.21	0	0	0.24	0.96	0.23	0	0.4	0
comp100967_c2	0.16	0.3	0	0.36	1.03	0	0.85	0	0.2
comp100967_c3	7.57	8.06	9.18	14.86	15.16	15.93	11.53	12.77	12.3
comp100968_c0	1.54	1.07	1.35	0.18	0.22	0.33	0.58	0.31	0.09
comp100968_c1	1.4	1.29	1.23	0.3	0.5	0.28	0.57	0.13	0
comp100968_c2	44.99	35.54	65.11	12.27	21.02	11.96	8.97	10.59	7.45
comp100969_c0	0.19	0.68	0.57	0.63	0.68	0.99	1.77	1.23	1.13
comp100969_c1	1.54	1.81	1.36	1.45	0.94	1.42	1.96	2.26	1.7
comp100970_c0	38.12	33.45	32.96	35.98	35.64	31.27	40.75	35.77	38.43
comp100971_c0	24.76	19.03	38.85	13.51	17.44	18.84	15.49	13.13	14.95
comp100972_c0	584.78	403.35	473.61	604.97	563.18	649.06	627.87	603.48	614.75
comp100973_c0	19.57	19.11	15.68	23.52	20.29	26.05	22.09	25.21	25.47
comp100974_c0	19	8.06	9.49	6.42	2.67	7.9	6.83	5.12	5.88
comp100974_c1	14.95	7.31	10.73	5.08	2.55	9.52	6.29	6.16	6
comp100974_c2	0	0.56	1.34	0.59	0	0.28	0.64	0	0.32
comp100974_c3	16.98	8.83	15.77	5.02	4.04	9.38	8.9	6.52	6.3
comp100975_c0	4.47	4.78	4.17	5.3	6.3	6.16	5.69	4.9	5.7
comp100976_c0	51.32	51.38	37.43	41.42	38.22	56.02	51.92	54.34	51.37
comp100977_c1	0.16	0.15	0.49	0.18	0.29	0.17	1.01	0.61	0.58
comp100977_c2	43.18	49.45	37.35	52.92	53.01	60.15	67.56	59.68	61.54
comp100978_c1	6.36	6.09	5.48	7.95	7.18	8.6	11.3	7.7	8.53
comp100979_c0	30.82	22.33	23.78	40.91	26.65	34	26.76	25.49	26.67
comp100980_c0	64.6	42.4	44.14	46.02	45.64	40.85	46.49	57.09	49.01
comp100981_c0	32.62	37.95	30.72	53.11	48.59	33	32.57	34.92	29.58
comp100982_c0	30.77	18.69	33.26	5.26	5.32	6.3	5.53	7.6	7.9
comp100983_c0	41.25	58.91	74.13	20.89	20.66	19.46	22.39	24.46	22.67
comp100984_c0	13.82	15.89	13.79	12.35	12.6	14.71	15.71	16.52	15.74
comp100984_c1	0.2	0.54	0.9	1.77	1.28	0.94	0.52	0.96	1.07
comp100984_c2	9	9.71	8.04	9.06	10.35	7.33	13.42	13.55	12.04
comp100985_c0	6.3	5.16	5.61	7.27	6.4	5.48	8.52	6.42	7.48
comp100986_c1	13.88	16.63	14.12	13.79	14.91	16.83	24.59	18.88	19.43
comp100987_c0	0.25	0.67	0.5	0.27	0.9	0	0.51	1.13	0
comp100987_c1	1.81	3.79	2.96	1.48	0.98	1.3	2.76	3.96	2.64
comp100987_c2	34.75	49.6	32.43	32.06	24.98	36.46	58.15	57.89	56.71
comp100988_c0	4.82	4.31	4.64	3.01	2.36	3.7	3.8	2.24	3.09
comp100989_c0	1414.72	2207.05	1670.75	1909.22	2812.07	1653.36	1473.97	1615.86	1561.48
comp100990_c0	9.28	5.23	4.74	5.89	2.55	4.86	7.79	7.14	7.56
comp100991_c0	3.61	4.3	5.27	19.49	10.28	13.5	18.88	20.67	21.49
comp100992_c0	1.42	0.93	1.46	0.76	0.63	0.36	0.27	1.49	0.31
comp100992_c1	3.17	2	2.75	0.95	1.25	1.51	2.58	1.23	2.55
comp100992_c2	3.18	2.22	2.51	1.19	2.09	0.83	2.28	1.99	1.53
comp100993_c0	1.8	1.79	1.9	3.37	3.24	3.62	1.79	3.12	3.23
comp100994_c0	2.94	2.64	6.98	6.76	9.9	5.73	3.08	3.69	2.86
comp100995_c0	1.89	5.22	11.32	2.02	0.59	1.68	2.69	6.27	5.89
comp100995_c1	68.15	63.15	78.13	57.25	38.29	59.19	70.28	75.28	75.75
comp100996_c1	18.03	22.3	18.41	27.24	19.38	24.33	19.77	20.77	25.29
comp100997_c0	630.31	722.2	774.9	494.22	883.46	448.94	430.47	482.77	400.92
comp100998_c0	5.17	6.35	7.18	9.85	13.34	9.68	7.99	9.57	9.37
comp100999_c0	10.83	7.69	10.97	5.93	5.65	6.8	10.51	9.58	8.04
comp1009_c0	0	0	0.23	2.43	0.21	1.02	0.24	0	0.09
comp101000_c0	0.59	1.19	0.24	0.53	1.31	0.5	0.5	1.14	1
comp101000_c1	29.97	30.63	25.4	23.02	23.5	25.77	32.85	28.13	30.54
comp101000_c2	0.5	0	0	0.37	0.3	0.18	0.17	0.79	1.81
comp101001_c0	3.49	3.12	3.39	1.71	2.84	2.58	4.92	4.19	4.77
comp101002_c0	35.03	78.33	102.66	161.88	165.32	102.49	123.84	154.7	105.88
comp101003_c0	51.34	36.23	31.16	54.25	30.52	50.87	67.45	58.56	60.09
comp101004_c0	59.7	40.99	38.13	32.01	22.92	42.85	47.89	43.83	45.2
comp101004_c1	0	2.65	1.05	1.16	1.31	0.22	1.3	1.74	0.25
comp101005_c2	0.2	0	0.42	0.23	0.18	0	0	0.57	0
comp101005_c3	50.05	51.48	41.55	59.72	45.22	60.56	76.28	64.53	73.1
comp101006_c0	1.67	2.14	2.37	0.75	2.88	0.89	2.98	0.48	1.21
comp101006_c1	7.94	8.26	7.32	7.33	6.33	7.48	9.61	7.8	8.6
comp101007_c0	4.88	6.46	4.8	8.65	8.73	8.62	8.65	9.22	8.88
comp101008_c0	3.4	4.68	4.83	7.34	6.5	5.01	6.47	7.63	5.54
comp101009_c0	18.1	11.37	11.67	11.01	10.91	10.89	12.91	11.8	14.2
comp101010_c0	8.66	6.72	9.39	8.94	10.22	9.48	9.6	11.84	9.75
comp101011_c0	0.61	1.26	0.93	0.69	0.14	0.81	1.13	0.44	0.92
comp101011_c1	3.18	2.65	3.55	3.1	2.53	2.85	3.91	3.94	2.45
comp101011_c2	0	0.71	0.26	0	0	0	0	0	0.31
comp101011_c3	0	0	0	0	0	0	0	0.22	0
comp101011_c4	0.51	0.83	0.86	0.29	0.3	0.55	1.02	0.77	0.86
comp101012_c0	15.01	14.3	9.48	15.44	9.02	11.32	12.44	13.96	15.97
comp101013_c0	17.56	22.06	19.83	30.11	27.25	32.01	30.3	29.46	30.13
comp101014_c1	32.58	38.91	29.83	25.29	19.76	29.71	37.3	36.86	37.56
comp101015_c0	55.76	60.38	51.17	126.11	70.4	106.7	91.9	90.61	91.81
comp101016_c0	32.84	35.16	27.1	15.88	17.05	18.64	22.88	23.86	26.42
comp101016_c1	3.77	1.67	0.89	2.5	1.48	2.26	2.27	1.09	2.31
comp101017_c0	13.55	7.17	20.76	5.2	4.34	3.33	3.92	3.74	4.74
comp101018_c0	37.89	43.04	37.31	43.34	44.85	50.7	52.95	47.04	51.32
comp101019_c0	350.23	244.3	210.27	5.17	30.81	16.09	208.82	229.36	208.28
comp101020_c0	86.18	84.96	82.59	104.87	103.41	131.78	127.41	132.49	127.09
comp101020_c1	37.34	38.73	47.9	53.24	50.66	57.47	45.7	48.08	56.42
comp101021_c0	4.77	5.6	6.37	6.6	6.82	6.82	9.11	8.17	10.13
comp101022_c0	6.29	5.43	3.75	5.08	3.92	5.57	7.33	8.15	7.71
comp101023_c0	10.1	8.61	9.64	10.01	10.52	10.11	12.07	11.8	11.46
comp101024_c0	10.01	11.01	10.54	9.39	9.77	11.85	15.33	15.27	14.04
comp101025_c0	2.54	2	2.49	2.18	1.46	2.53	2.94	2.65	2.56
comp101026_c0	0.93	0.21	0	0	0	0	0	0.22	0
comp101026_c1	1.32	1.37	1.39	3.07	1.37	3.13	2.86	3.08	2.43
comp101026_c2	0	0	0.53	0	0	0	0	0	0
comp101026_c3	0.98	1.42	0.55	1.69	1.89	2.1	1.49	1.05	1.78
comp101027_c0	180.39	114.78	137.19	117.85	105.5	151.59	108.46	111.27	118
comp101028_c0	2.12	3.09	1.8	1.01	3.09	0.8	1.39	0.88	1.25
comp101028_c1	0.64	1.18	0.46	0.66	0.42	0.95	1.03	1.08	0.94
comp101028_c2	1.02	0.27	0	0	0.54	0.16	0.46	0.14	0
comp101028_c3	1.74	1.77	3.53	2.81	2.78	1.07	0.21	0.66	0.24
comp101028_c4	12.72	12.48	12.11	10.81	10.96	8.19	9.99	10.2	9.49
comp101029_c0	10.39	9.27	6.97	6.26	6.2	7.31	4.62	3.98	4.39
comp101030_c0	0	1.13	0	0.83	0	0	0	0	0
comp101030_c1	45.71	50.72	38.72	46.83	50.43	53.32	60.75	56.49	53.33
comp101031_c0	5.47	5.66	4.45	4.17	4.56	3.08	6.42	6.24	5.78
comp101032_c0	4.03	4.9	4.62	3.08	3.07	3.45	4.17	3.54	3.78
comp101033_c0	60.63	61.51	53.61	36.45	32.42	36.54	54.59	52.96	50.14
comp101034_c0	0.82	0.22	0.48	0.53	0.11	0.25	0.87	0.57	1.57
comp101034_c1	1.84	1.87	2.02	1.57	0.97	1.37	1.55	1.78	3.7
comp101034_c2	59.41	44.27	38.34	30.69	26.88	30.48	42.72	36.16	39.06
comp101034_c3	0.8	0.16	0.36	0.6	0	0.28	0.95	0.09	0.65
comp101035_c0	116.06	140.68	97.56	137.07	112.01	144.1	168.81	157.87	160.44
comp101036_c0	10.8	5.03	4.08	0.37	0.46	0.58	0.85	0.93	0.86
comp101037_c0	330.7	224.08	450.93	650.02	949.51	598.68	375.4	399.74	377.98
comp101038_c0	21.7	22.02	18.21	28.09	21.5	27.63	28.56	27.74	29.15
comp101039_c0	1.69	1.22	1.82	0.91	0.49	42.64	2.34	2.02	3.7
comp101040_c0	13	16	39.16	2.94	3.84	0.6	3.67	4.75	2.31
comp101041_c0	7.83	5.19	5.07	3.27	2.37	8.69	3.58	4.06	3
comp101042_c0	32.59	21.34	31.96	46.62	27.36	53.35	26.26	31.76	31.47
comp101042_c1	0.6	0.18	0.2	0	0	0.43	0.84	0.38	1.7
comp101043_c0	36.82	29.34	28.07	39.21	29.76	47.87	48.14	46.39	41.97
comp101044_c0	8.19	10.94	10.53	7.01	6.74	10.13	6.18	8.13	6.62
comp101045_c2	10.09	13.37	7.82	12.53	12.23	13.99	14.95	15.48	11.37
comp101046_c0	20.47	26.63	23.88	33.12	26.07	28.03	23.64	22.86	25.94
comp101047_c0	7.07	6.13	6.25	11.44	9.12	10.64	9.14	12.17	10.34
comp101048_c0	46.85	41.89	33.57	64.58	47.34	60.29	66.94	59.83	63.73
comp101049_c0	105.52	75.84	66.49	23.22	20.2	52.74	42.81	33.18	42.82
comp101050_c0	44.99	34.73	35.71	34.5	26.45	44.63	40.89	38.47	48.54
comp101051_c0	5.95	8.09	13.87	5.36	8.81	6.47	3.86	5.14	5.09
comp101052_c0	2.27	3.67	9.57	7.35	9.71	9.59	4.08	5.58	5.95
comp101053_c0	13.25	20.41	13.33	25.37	28.16	30.11	23.52	21.1	25.08
comp101054_c0	8.27	6.06	4.71	9.53	5.45	8.77	9.03	6.91	10.12
comp101054_c1	12.46	10.06	6.95	13.22	6.91	12	14.51	16.85	17.08
comp101055_c0	9.52	4.9	5.98	8.44	5.63	7.9	9.19	10.26	10.55
comp101056_c0	1.59	2.18	1.81	2.58	1.31	1.99	2.38	2.1	2.63
comp101057_c0	24.52	28.25	30.61	26.91	20.76	35.3	28.78	30.79	31.68
comp101058_c0	20.11	15.88	16.39	11.78	7.03	13.21	10.81	11.22	10.49
comp101059_c0	1.77	1.25	1.97	2.15	3.12	2.41	2.28	3.11	2.28
comp10105_c0	0	0	0	2.11	0.55	2.4	0	0.58	0.24
comp101060_c0	9.13	7.41	6.66	11.96	8.82	11.33	11.32	10.43	11.66
comp101061_c0	17.44	15.63	15.32	15.34	14.59	15.66	17.7	19.58	20.45
comp101062_c0	221	274.92	305.08	612.07	692.75	587.24	630.76	663.16	606.18
comp101063_c0	6.29	9.8	9.23	14.75	20.7	16.43	19.84	27.26	22.49
comp101064_c0	0.92	0.5	0	0.62	0	0.2	0.39	0	1.78
comp101064_c1	16.68	16.96	12.31	8.86	7.29	10.03	15.79	13.37	16.2
comp101065_c0	9.73	11.47	9.64	9.83	6.59	7.4	11.93	9.73	11.28
comp101065_c1	0.67	1.53	0.32	2.09	0.64	1.63	1.45	1.1	0.45
comp101066_c0	18.97	9.18	13.3	13.69	10.85	13.71	12.31	15.66	16.51
comp101066_c1	0.42	0.54	1.48	0.38	1.16	0.71	0.63	1.17	1.11
comp101067_c0	11	12.58	19.43	8.48	8.05	6.98	7.29	8.17	7.82
comp101068_c0	33.56	30.35	36.91	33.61	34.22	40.25	31.68	31.66	32.72
comp101069_c0	162.08	146.72	144.64	124.55	128.08	165.96	131.82	127.95	171.91
comp101070_c0	11.86	16.41	10.11	11.25	9.68	12.97	17.36	13.96	18.83
comp101071_c0	16.03	24.73	28.81	106.79	123.76	90.34	60.41	74.95	61.44
comp101072_c0	39.04	30.65	25.67	30.77	27.97	33.83	38.61	34.74	35.8
comp101073_c0	21.09	18.12	17.95	13.11	12.75	13.4	17.08	13.56	15.71
comp101074_c0	57.33	92.53	63.05	56	58.94	53.82	58.48	49.59	49.55
comp101075_c0	10.74	12.06	11.84	11.34	10.42	11.67	14.55	14.26	15.79
comp101076_c0	10.7	7.89	7.52	13.95	8.53	11.1	11.91	12.11	13.44
comp101077_c0	7.32	7.49	5.93	5.87	4	8.11	7.91	7.47	8.48
comp101078_c0	5.51	5.97	4.77	4.59	2.78	5.39	5.72	6.25	6.92
comp101079_c0	26.76	24.34	25.68	22.88	16.02	18.47	27.25	24.82	23.82
comp101080_c0	8.25	5.38	5.99	5.33	4.85	4.16	4.1	4.39	4.36
comp101080_c1	11.16	9.34	14.94	11.93	15.21	11.71	13.97	14	14.02
comp101081_c0	5.76	5.35	5.73	5.12	4.66	6.24	5.43	5.57	5.34
comp101082_c0	0.2	0	0	0.23	0.55	0.44	0.21	0.38	0
comp101082_c1	3.11	2.03	3.32	2.77	3.07	2.91	2.81	3.58	4.4
comp101083_c0	7.74	9.26	10.18	19.46	20.47	15.94	18.43	17.23	17.75
comp101084_c0	27.53	32.55	24.84	47.74	46.79	49.73	38.81	43.22	36.74
comp101085_c0	49.36	42.24	33.87	40.14	37.14	51.32	66.44	52.44	59.56
comp101086_c0	1.46	2.22	1.49	1.54	1.55	1.71	2.01	2.19	1.87
comp101087_c0	5.98	4.95	4.51	5.68	4	7.5	7.08	6.58	6.14
comp101088_c0	10.74	5.4	7.96	9.27	9.87	10.65	8.15	8.31	8.89
comp101089_c0	3.5	2.55	3.67	2.93	3.95	4.17	3.74	4.5	3.53
comp101090_c0	6.09	9.2	9.98	12.58	13.47	10.97	10.86	9.27	8.02
comp101091_c0	10.65	8.6	10.15	7.57	6.87	7.38	10.37	9.83	8.85
comp101092_c0	198	65.45	60.96	26.82	25.34	12.84	30.25	30.26	15.16
comp101093_c0	43.59	58.31	45.58	51.44	67.52	47.84	58.19	54.45	60.71
comp101094_c0	16.74	10.67	16.33	15.94	12.15	19.36	13.87	13.7	14.4
comp101095_c0	9.5	7.5	14.09	21.58	19.51	29.05	22.18	21.15	23.78
comp101096_c0	1.29	2.4	1.88	0.12	0.72	0.11	0.82	0.51	0.37
comp101096_c1	201.09	197.34	215.61	46.41	46.4	48.63	64.92	51.92	57.82
comp101096_c2	0	0	0	0	0	0.28	0	0	0
comp101097_c0	46.71	52.5	63.62	98.3	107.47	103.26	118.56	108.51	106.75
comp101098_c0	19.81	11.14	13.74	16.55	12.03	15.65	13.78	16.91	15.27
comp101099_c0	10.7	11.96	9.07	11.65	11.33	13.16	15.4	11.97	12.41
comp101100_c0	19.97	17.42	32.47	40.32	46.01	45.47	36.47	36.7	30.56
comp101101_c0	4.21	6.55	4.22	5.33	5.53	6.96	7.35	7.41	8.16
comp101102_c0	1.8	2.55	0.76	1.21	0.89	2.38	1.81	2.69	1.17
comp101102_c1	0.35	0.47	0	0	0	0	1.46	0.82	0
comp101102_c2	24.19	27.32	18.17	19.14	20.61	22.74	31.67	30.09	28.88
comp101103_c0	1.67	1.33	2.59	1.5	0.9	2.48	1.22	1.73	0.66
comp101103_c1	4.67	7.09	4.4	5.69	4.49	5.49	3.33	6.54	5.2
comp101104_c0	138.79	93.71	94.91	97.5	74.61	108.4	103.55	103.77	98.3
comp101105_c0	7.89	8.29	9.78	7.67	9.25	6.02	13.02	9.76	11.64
comp101106_c0	24.74	29.11	22.67	28.81	21.97	26.83	28.1	34.13	25.53
comp101106_c1	0.42	0.64	0.28	0.31	0.38	0.3	0.79	1.19	0.34
comp101107_c0	9.49	9.42	9.99	9.59	8.09	10.05	12.02	12.35	10.89
comp101108_c0	2.36	3.1	3.2	7.35	5.57	10.54	6.75	5.87	5.65
comp101108_c1	1.86	3.36	2.24	6.3	4.93	8.45	5.51	5.93	5.7
comp101109_c0	5.04	5.45	4.94	5.62	5.82	5.26	6.58	4.25	7.93
comp101110_c0	1.4	1.42	2.22	0.53	0.85	0.66	0.33	0	0.56
comp101110_c2	19.44	18.23	13.21	10.84	11.72	13.63	11.79	13.37	17.03
comp101110_c4	0	0.43	1.43	0	0	0	0	0	0
comp101111_c0	86.56	63.71	78.13	61.63	47.91	60.01	70.56	66.8	68.59
comp101112_c0	42.35	44.41	34.94	48.39	38.23	50.97	52.25	47.12	46.81
comp101113_c0	5.05	4.35	3.69	5.12	4.25	5.16	6.22	8.05	6.24
comp101114_c0	8.1	8.35	8.9	10.96	8.43	9.28	13.22	12.08	9.71
comp101115_c0	12.14	12.13	11.93	16.4	12.78	15.9	16.54	16.33	14.35
comp101116_c0	7.45	7.53	7.64	6.97	6.96	7.64	6.76	6.96	5.62
comp101116_c1	8.82	8.27	10.55	10.62	11.99	8.95	9.08	9.6	8.86
comp101117_c0	13.47	15.49	12.88	14.05	10.09	16.54	17.61	17.22	18.74
comp101118_c0	39.66	32.14	30.18	17.37	17.48	23.79	30.33	23.33	26.68
comp101119_c0	45.7	39.56	48.25	35.45	43.77	35.55	46.99	51.96	47.59
comp101119_c1	0.85	1.43	1.05	3.18	2.51	3.25	4.29	4.95	5.29
comp101120_c0	0.32	0.84	0.33	0.48	0.3	0.56	0.34	0.84	1.68
comp101120_c1	1.64	1.69	1.55	1.59	0.9	1.88	4.36	2.86	3.24
comp101121_c0	42.52	53.33	97.7	108.03	157.43	88.82	83.61	86.21	68.27
comp101122_c0	8.43	5.01	8.29	7.97	7.35	6.91	5.82	5.9	6.71
comp101123_c0	65.82	73.64	82.01	42.86	51.01	43.48	49.9	47.36	51.08
comp101124_c0	208.96	195.15	280.36	293.57	201.34	282.65	273.65	283.51	231.96
comp101125_c0	1.88	2.76	2.56	4.14	1.87	8.6	3.28	4.14	4.15
comp101126_c0	15.79	13.54	13.37	10.4	10.97	12.42	11.84	13.62	12.13
comp101127_c0	6.18	3.42	3.94	5.08	2.92	5.56	4.88	5.67	5.33
comp101128_c0	0.5	0.51	0.58	5.55	7.49	7.84	9.93	10.02	10.08
comp101129_c0	6.3	9.23	10.93	36.13	35.99	28.15	27.48	30.41	25.32
comp101130_c0	3.89	2.5	3.8	12.96	18.71	12.67	8.79	13.13	12.57
comp101131_c1	12.99	11.29	10.45	6.91	5.47	7.87	11.86	10.97	11.01
comp101132_c0	21.42	22.35	19.75	26.5	30.65	22.65	24.32	26.37	22.26
comp101133_c0	8.66	12.58	12.3	21.09	31.22	22.81	8.99	12.83	10.68
comp101134_c0	1.83	0.97	1.37	1.56	2.18	1.21	1.93	2.26	2.51
comp101134_c1	2.66	1.98	1.68	2.39	1.99	2.53	1.91	3.28	3.09
comp101134_c2	1.3	0.99	1.4	0.3	0.19	0.86	0.91	0.82	0.52
comp101135_c0	16.24	14.4	15.55	19.66	17.57	14.63	25.85	20.25	22.97
comp101136_c1	2.75	5.98	4.37	4.7	6.01	3.4	4.5	5.51	4.59
comp101137_c0	6.35	6.68	9.69	12.89	12.58	10.08	11.04	16.02	16.35
comp101138_c0	187.2	162.15	157.72	100.02	129.84	172.55	142.52	141.19	125.25
comp101138_c1	7.64	7.18	12.4	12.39	13.61	15.69	10.25	10.16	14.34
comp101138_c2	89.38	85	94.19	56.8	63.8	75.04	65	66.16	72.77
comp101139_c0	1.43	2.05	1.22	3.78	4.39	4.8	1.7	0.71	0.48
comp101139_c1	0.86	1.01	0.63	2.63	2.26	2.86	2.08	0.95	0.45
comp101139_c2	9.93	13.8	8.74	9.09	12.16	10.63	10.31	10.23	10.85
comp101140_c0	266.65	304.55	178.21	313.15	327.11	281.9	249.7	231.93	228.19
comp101141_c0	7.22	7.64	4.95	6.43	4.99	6.87	10.39	7.36	7.74
comp101141_c1	1.91	1.6	1.96	2.46	1.46	2.03	1.86	2.2	1.97
comp101142_c0	31.94	28.26	24.98	29.2	28.3	32.79	35.03	34.98	36.21
comp101143_c0	15.65	23.93	29.83	7.37	12.59	6.89	8.52	8.55	6.36
comp101144_c0	11.02	10.07	8.6	7.45	5.99	6.98	6.4	8.17	8.52
comp101145_c0	2.69	2.65	2.66	8.27	9.3	7.11	6.64	6.75	6.81
comp101146_c0	149.89	125.23	127.36	40.37	34.94	47.46	51.42	43.6	45.7
comp101147_c0	65.69	62.27	57.09	76.04	77.89	84.19	68.33	76.21	73.04
comp101148_c0	56.55	46.62	38.48	34.74	27.7	39.91	38.95	31.54	36.47
comp101149_c0	3.74	4.91	6.69	2.72	3.52	2.58	3.22	3.28	3.58
comp101150_c0	24.73	13.19	21.78	18.73	14.3	25.04	19.36	18.7	22.65
comp101151_c0	5.01	5.43	5.74	6.66	5.86	6.75	7.76	8.81	10.38
comp101152_c0	184.82	96.05	140.95	183.35	127.83	201.23	170.08	161.12	168.14
comp101152_c1	0.27	0	0.28	0.31	0.24	0.58	1.42	1.25	0
comp101153_c0	30.3	20.1	35.52	10.41	13.57	14.46	5.8	10.18	5.88
comp101154_c0	48.26	40.18	49.26	51.99	57.51	61.77	63.46	75.42	71.14
comp101155_c0	14.23	11.72	10.76	7.05	7.24	9.63	12.32	11.34	11.57
comp101156_c0	57.37	48.63	47.19	44.71	47.76	40.88	57.75	50.55	50.01
comp101157_c0	6.38	8.24	7.09	6.44	8.66	6.44	9.15	10.8	5.41
comp101158_c0	1.46	0.83	1.17	1.9	0.88	2.02	1.02	1.01	1.12
comp101158_c1	2.78	2.16	0.9	2	1.54	1.5	2.45	2.04	3.26
comp101159_c0	5.16	4.61	5.35	9.31	8.67	8.16	6.05	7.96	6.26
comp101160_c0	9.5	7.18	9.02	9.52	7.06	10.35	8.97	9.02	9.89
comp101161_c0	154.51	97.39	110.11	66.06	92.8	129.63	86.42	78.13	107
comp101162_c0	17.2	18.18	19.07	30.55	26.42	26.42	26.59	30.23	26.27
comp101163_c0	108.66	116.2	98.4	30.61	25.15	21.59	25.61	23.13	18.63
comp101164_c0	24.81	36.23	30.99	35.85	37.86	38.78	40.48	37.17	39.81
comp101165_c0	0.27	0.68	0.62	0.31	0.38	0	0.29	1.07	0.58
comp101165_c1	9.1	7.77	7.35	7.72	7.13	9.75	12.69	10.78	11.14
comp101166_c0	3.3	3.48	5.6	3.79	2.83	4.43	4.45	3.95	3.09
comp101167_c0	4.1	7.97	7.54	7.59	7.28	3.83	6.47	6.06	5.38
comp101168_c0	12.75	15.01	10.85	12.91	9.9	15.13	16.88	16.61	14.22
comp101169_c0	17.32	15.95	15.33	18.94	13.9	19.36	20.54	18.78	16.96
comp101170_c0	7.5	6.27	7.64	8.39	7.23	7.85	10.46	8.49	10.74
comp101170_c1	0	0.79	0	0	0	0	0	0.81	0
comp101171_c0	41.06	45.86	37.9	35.89	23.83	34.6	43.21	40.6	43.92
comp101172_c0	3.84	2.13	2.84	3.03	2.36	4.28	4.37	2.86	2.76
comp101173_c0	0	0	0	0	0	0	0	1.45	0
comp101173_c1	0	1.08	0.27	0.3	0.72	0.14	1.25	1.52	0.64
comp101173_c2	161.48	157.11	147.29	200.44	165.26	188.99	199.85	211.71	188.14
comp101174_c0	34.09	28.58	31.44	31	30.16	31.87	31.83	31.74	29.55
comp101174_c1	1.18	0.7	0.96	0.87	0.46	2.28	0.59	1.45	1.27
comp101175_c0	3.01	2.63	1.12	3.49	2.53	3.39	4.46	2.88	3.53
comp101176_c0	78	68.23	72.18	87.8	99.05	70.96	79.13	89.58	73.03
comp101177_c0	91.88	68	81.64	43.04	31.01	45.21	46.78	49.46	45.07
comp101178_c0	10.54	10.47	8.82	8.72	7.21	11.29	12.07	9.91	9.4
comp101179_c0	0	0	0	2.43	0.52	1.8	0	0	0
comp101179_c1	1.99	0.42	1.09	1.04	0.14	0	0.49	0.44	1.49
comp101179_c2	1.41	2.58	1.49	2.49	2.45	2.63	2.98	2.85	3.04
comp101179_c3	12.55	16.25	19.76	17.8	19.55	25.19	20.16	20.53	19.78
comp101179_c4	22.81	22.86	18.57	23.01	25.9	28.54	30.15	33.17	29.2
comp101179_c5	1.49	1.83	1.24	1.74	2.36	2.5	2.36	2.41	3.04
comp101180_c0	122.59	75.13	64.8	67.59	42.44	102.88	56.88	67.1	72.07
comp101181_c0	7.42	10.43	7.79	12.43	17.64	12.99	7.09	7.7	7.79
comp101182_c0	0.55	0.62	0.13	3.38	1.58	3.94	2.45	0.74	1.53
comp101182_c1	25.82	23	23.17	27.77	21.46	26.95	30.07	31.31	29.58
comp101183_c0	16.87	7.94	6.15	11.49	5.85	13.12	14.35	14.53	12.42
comp101184_c0	6.46	4.82	5.39	3.64	5.28	6.81	5.14	7.39	6.29
comp101185_c0	19.52	18.74	17.12	20.27	20.17	21.26	25.2	25.76	21.08
comp101186_c0	0	0	0.26	0	0	0	0.53	0	0
comp101186_c1	0.44	0.3	1.13	0.12	1.13	0.59	0.59	0.54	0.27
comp101186_c3	1.68	0.28	0.16	0.35	0	0.81	0.97	0.59	0
comp101186_c4	0	0.15	0	0.76	1.08	0.36	1.07	1.45	1.64
comp101186_c5	23.77	23.87	19.84	21.6	21.72	24.34	33.86	32.22	31.57
comp101187_c0	2.18	3.43	3.15	1.4	1.74	1.03	1.1	1.23	1.15
comp101188_c0	23.19	25.16	23.69	26.22	23.05	29.65	31.34	32.24	31.35
comp101189_c1	14.96	9.91	10.15	9	12.65	13.46	12.44	11.06	8.82
comp101189_c2	0	0	0	0	0	0	1.29	0.23	0
comp10118_c0	0	0	0.18	0	0.81	0.19	0.75	0.17	0
comp101190_c0	1.44	1.82	3.01	1.95	2.73	14.71	2.27	2.51	3.47
comp101191_c1	3.81	7.61	3.58	3.32	3.35	2.92	6.31	7.23	4.13
comp101191_c2	10.34	11.11	10.81	5.46	10.41	6.93	12.1	11.24	12.83
comp101191_c3	0.68	0	0.69	0.15	0	0.14	2	0.13	1.48
comp101192_c0	4.96	1.99	1.4	1.38	0.51	0.58	2.03	2.05	1.33
comp101192_c2	0.68	1.03	0.23	0	0	0	0	1.26	0.54
comp101192_c3	67.14	46.25	37.44	71.29	33.27	63.94	84.47	66.5	64.84
comp101193_c0	2.5	3.75	1.77	3.34	1.19	2.13	4.3	2.81	2.55
comp101193_c1	2.95	3.16	2.04	3.18	2.43	3.42	3.3	2.93	3.96
comp101194_c0	0	0	0.55	0	0.48	0	0	0	0.33
comp101194_c1	4.39	2.41	2.98	6.77	4.03	7.98	4.99	4.4	6.63
comp101194_c2	4.81	5.97	6.74	8.03	5.76	7.54	8.57	8.04	8.36
comp101194_c4	2.25	2.68	3.61	4.57	3.91	4.28	3.47	3.74	2
comp101195_c0	30.72	30.1	23.96	30.61	21.51	37.81	37.75	39.43	32.95
comp101196_c0	0.51	0.31	0.35	1.04	0.31	0.54	2.33	0.32	1.03
comp101196_c1	19.51	21.19	10.37	21.75	11.16	22.96	29.49	30.76	29.28
comp101196_c2	26.16	27.92	18.07	29.56	21.01	31.04	39.67	34.23	42.73
comp101197_c0	45.79	42.23	49.4	29	27.1	28.74	34.63	30.35	31.66
comp101198_c0	74.61	78.27	61.52	51.8	58.04	68.68	81.25	65.59	76.56
comp101199_c0	9.45	9.72	8.76	9.52	9.05	9.51	12.5	10.92	15.76
comp101200_c0	9.61	14.13	8.44	8.23	7	7.95	12.72	13.31	12.62
comp101201_c0	3.36	2.15	3.24	2.42	3.79	4.98	2.28	3.42	2.23
comp101201_c1	13.87	17.13	21.99	21.78	17.11	18.83	14.01	15.94	11.68
comp101201_c2	1.97	4.09	4.46	4.1	4.34	2.72	3.3	3.6	1.14
comp101202_c0	29.15	28.53	27.85	27.38	24.84	26.61	31.87	27.5	32.47
comp101203_c0	3.1	3.31	2.22	4.02	4.24	3.69	3.28	4.56	2.74
comp101204_c0	5.88	3.01	5.7	9.61	9.85	9.32	9.5	9.45	10.08
comp101205_c0	11.76	3.08	8.85	1.78	0.85	1.21	0.6	1.58	0.27
comp101205_c1	3.79	1.79	4.18	0.94	0.69	0.29	0.2	0.91	0.56
comp101206_c0	15.37	6.75	13.93	8.91	10.17	18.44	10.9	10.4	13.66
comp101207_c0	51.62	36.48	56.7	47.08	42.07	45.44	29.84	37.09	35.36
comp101207_c1	1.65	1.63	0.78	1.15	0.35	1.08	0.94	0.74	0.62
comp101208_c0	2.81	1.18	2.14	1.3	3.07	2.05	1.58	2.25	3.12
comp101209_c0	440.36	334.09	300.96	308.34	284.33	361.44	433.58	357.82	410.4
comp101210_c0	1.11	0.51	0	0	0.84	0	0.58	1.05	0.22
comp101210_c1	4.67	1.58	2.31	4.34	1.68	5.48	4.01	2.87	4.42
comp101211_c0	6.63	5.45	5.51	4	4.27	4.09	5.15	6.03	5.07
comp101212_c0	336.56	200.45	228.87	249.21	171.84	229.05	214.97	228.04	220.88
comp101213_c0	481.41	353.13	272.55	428.07	286.81	416.54	511.09	504.13	416.14
comp101214_c0	35.01	37.2	30	31.88	31.92	35.3	47.14	40.62	46.7
comp101215_c1	40.76	83.42	63.35	99.53	140.61	110.05	96.69	107.19	100.08
comp101215_c3	1.3	1.67	1.19	1.32	1.91	2.34	1.93	0.88	0.32
comp101216_c0	10.28	9.93	6.29	4.31	5.85	3.79	6.68	6.29	4.75
comp101216_c1	0.41	1.7	1.05	0.23	0	0.22	1.08	0	1.25
comp101217_c0	100.03	105.33	104.69	71.91	89.89	76.95	70.86	69.71	69.63
comp101218_c0	11.81	10.79	16.97	14.62	14.56	13.01	16.12	16.62	16.42
comp101219_c0	19.98	40.71	28.07	73.19	68.51	66.37	108.04	90.12	107
comp101220_c0	1.55	2.31	2.44	2.48	3.02	3.28	2.38	2.92	2.89
comp101221_c0	19.45	22.85	21.44	15.99	20.31	14.37	24	21.1	20.69
comp101222_c0	3.82	5.16	4.68	3.83	2.77	4.13	4.62	5.27	3.57
comp101223_c0	47.29	67.91	66.58	122.69	139.11	107.69	123.07	128.08	123.96
comp101223_c1	43.61	37.48	35.09	34.98	30.72	36.54	51.75	42.79	51.43
comp101224_c0	1.12	0.8	1.02	0.56	0.46	0.53	0.92	0.24	1.36
comp101224_c1	47.34	47.4	43.72	35.24	34.46	40.1	53.1	54.06	55.54
comp101224_c2	0	0	0	0.67	2.36	0	0	0.54	0.36
comp101225_c0	16.65	13.77	12.78	12.05	8.59	15.86	18.91	19.53	16.11
comp101226_c0	185.69	122	119.44	132.24	115.3	158.79	209.95	208.5	246.52
comp101227_c0	15.61	15.3	14.39	8.79	8.88	10.17	11.66	10.05	12.95
comp101227_c1	13.16	11.22	8.13	7.76	10.12	7.74	9.01	11.52	9.9
comp101227_c2	1.22	1.12	0.67	0.85	0.7	1.69	1.7	1.75	1.14
comp101227_c3	16.54	13.48	13.5	11.74	12	12.35	13.29	13.72	12.36
comp101228_c0	5.15	5.09	4.51	6.03	6.31	5.58	9.6	6.1	8.43
comp101229_c0	2.27	2.72	2.35	3.17	2.63	1.8	2.78	2.4	0.98
comp101229_c1	0	0.23	0	0	0	1.64	0.27	0	0
comp101230_c0	26.02	23.16	20.83	20.39	18.77	24.77	31.65	26.09	29.85
comp101231_c0	13.95	12.24	12.66	23.47	21.35	19.45	16.39	17.62	16.93
comp101232_c0	20.92	21.3	19.64	22.02	18.98	20.35	24.84	21.86	23.11
comp101233_c0	1.86	2.25	4.67	56.84	79.6	64.95	44.62	48.69	49.11
comp101234_c0	101.61	95.69	72.52	27.93	30.4	41.84	32.36	25.09	30.22
comp101235_c0	1.85	1.05	1.48	0.41	0.4	0.38	0.45	0.9	0.59
comp101235_c1	190.02	156.88	175.04	130.3	124.78	146.77	141.57	139.79	141.35
comp101235_c2	2.54	1.78	1.34	1.8	1.5	3.72	4.07	3.05	5
comp101235_c3	2.23	1.87	1.61	2.89	1.87	3.03	2.3	2.91	4.01
comp101236_c0	8.49	6.09	5.88	8.36	6.02	9	10.09	8.38	9.47
comp101237_c0	38.85	24.75	28.23	38.68	35.52	47.81	49.74	44.59	55.61
comp101238_c0	18.3	15.84	14.25	19.93	18.56	21.63	25.54	25.07	28.91
comp101239_c0	15.58	13.85	10.37	9.65	9.36	10.28	14.55	11.77	13.05
comp101240_c1	15.56	13.36	15.24	8.89	9.11	6.9	11.43	11.93	10.89
comp101241_c0	10.36	8.12	11.02	12.44	12.28	10.86	10.03	7.86	8.65
comp101242_c0	51.13	42.92	43.53	52.13	50.01	50.23	64.03	60.59	56.03
comp101243_c0	3.12	2.91	4	4.18	4.61	3.26	2.94	2.9	2.23
comp101244_c0	0.45	0.62	0.23	0.76	0	0.96	0.47	0.63	0
comp101244_c1	2.56	3.97	3.25	2.07	2.41	3.01	4.33	4.89	5.53
comp101244_c2	7.69	7.53	7.69	18.57	20.22	17.6	28.36	25.74	30.34
comp101244_c3	0.11	0.47	0.4	0.83	0.48	0.83	1.38	1.29	1.03
comp101244_c4	0.57	1.23	0.98	1.08	1.73	0.85	2.94	1.8	4.05
comp101244_c5	0.76	0.64	0.2	1.51	1.14	0.88	2.25	2.34	1.63
comp101244_c6	0.74	0.95	0.45	0.33	0.83	0.78	0.63	1.61	1.35
comp101245_c0	84	65.59	71.89	61.87	63.04	58.68	75.04	77.68	79.96
comp101245_c1	1.86	0.68	0.57	0.84	0.84	1.98	0.78	0	0
comp101246_c0	14	15.07	12.33	15.73	15.8	16.17	17.04	20.69	18.94
comp101247_c0	6.22	6.61	6.39	5.24	5.96	5.87	7.04	7.34	8.74
comp101248_c0	29.45	21.99	23.86	20.05	25.79	24.81	21.44	23.78	22.04
comp101249_c0	34.3	25.4	20.69	19.89	22.7	35.38	19.4	18.99	20.93
comp101250_c0	15.9	13.23	12.77	13.21	12.06	15.87	11.87	13.72	14.24
comp101251_c0	36.65	48.36	27.57	36.44	30.3	41.88	35.34	32.22	39.68
comp101252_c1	31.78	50.57	54.28	49.41	65.44	34.13	63.7	68.14	71.76
comp101253_c0	4.53	5.51	2.6	2.47	2.32	2.85	8.43	8.19	7.7
comp101254_c0	91.05	81.99	74.8	61.16	43.9	31.97	62.27	59.82	43.57
comp101255_c0	28.92	19.83	20.6	23.84	15.48	21.84	25.77	21.31	22.2
comp101256_c0	23.92	22.28	21.49	26.87	25.46	28.89	17.02	21.12	20.39
comp101256_c1	18.05	17.36	22.18	4.53	20.43	3.63	15.66	17.69	18.6
comp101256_c2	0	1.71	0.87	1.15	1.08	0.54	1.25	0.65	0.21
comp101257_c0	138.79	198.32	142.73	208.69	215.95	211.96	238.77	220.92	243.71
comp101258_c0	2.05	2.64	2.24	2.24	2.68	1.85	3.85	4.06	4.28
comp101259_c0	19.69	18.7	13.03	12.58	9.77	15.22	12.06	12.91	13.27
comp101260_c0	96.47	51.75	70.32	39.17	37.31	33.48	41.97	41.77	36.91
comp101261_c0	17.79	27.02	22.3	22.18	22.28	24.12	25.65	28.77	28.97
comp101262_c0	7.39	6.51	7.53	6.3	3.91	7.75	7.99	8.39	9.28
comp101263_c0	17.07	17.25	17.94	5.41	15.54	17.05	11.76	11.4	16.56
comp101263_c1	25.29	23.35	29.9	8.85	23.89	23.01	14.55	12.98	20.64
comp101264_c0	14.43	9.31	11.18	21.42	14.32	22.47	20.75	23.55	24.04
comp101265_c0	6.86	6.29	7.31	7.99	6.02	6.48	7.52	7.18	6.9
comp101265_c1	12.36	17.83	13.96	16.38	14.87	15.99	16.56	18.84	13.83
comp101266_c0	46.86	68.19	92.5	50.14	46.94	57.45	45.73	50.09	57.51
comp101267_c0	5.88	6.38	10.44	19.21	17.12	11.87	16.1	17.46	14.42
comp101268_c0	1.44	2.31	1.53	1.97	1.86	2.79	3.08	1.66	1.87
comp101269_c0	20.47	26.79	20.55	22.02	15.24	21.63	30.08	27	27.86
comp101270_c0	5.36	4.19	5.12	2.55	2.78	2.84	2.38	2.47	1.96
comp101271_c0	8.27	6.93	6.68	5.56	3.11	7.19	6.47	6.96	6.58
comp101272_c0	71.86	35.25	48.2	57.87	42.91	50.14	50.08	45.23	42.29
comp101273_c0	1.54	0.77	0.86	1.42	0.26	0.59	0.3	0.4	0.17
comp101273_c1	3.69	3.82	2.28	2.56	2.51	1.94	2.97	2.48	3.17
comp101274_c0	9.86	9.46	8.51	6.03	7.23	6.18	10.23	10.32	10.45
comp101275_c0	3.83	3.24	4.17	7.34	6.15	6.75	7.53	6.55	7.86
comp101276_c0	37.18	38.66	32.46	37.39	25.65	31.73	30.49	36.53	36.89
comp101277_c0	12.6	8.85	10.62	4.24	4.71	4.67	4.55	4.3	4.32
comp101278_c0	31.17	33.23	28.01	33.65	28.22	37.92	37.8	35.88	38.98
comp101279_c0	36.95	45.53	46.22	123.55	111	111.58	88.32	108.7	87.34
comp101280_c0	28.81	38.96	38.3	41.95	43.14	42.07	43.69	41.68	37.24
comp101281_c0	4.72	4.72	4.43	4.45	4.18	5.04	6.87	6.93	4.95
comp101282_c0	66.18	48.57	54.94	66.21	52.21	62.31	69.15	69.65	63.01
comp101283_c0	15.56	19.85	14.37	8.28	9.58	9.64	8.36	9.76	8.33
comp101284_c0	17.44	19.9	16.18	28.96	23.24	28.58	26.88	27.36	26.08
comp101285_c0	1.82	1.55	2.08	1.31	0.46	1.43	1.65	0.92	2.41
comp101285_c2	4.81	5.65	3.55	5.01	4.16	5.05	6.11	7.32	4.51
comp101286_c0	4.96	3.74	3.3	3.55	3.43	4.5	3.12	2.14	3.44
comp101287_c0	52.82	62.87	50.08	37.59	35.45	46.05	46.61	43.55	46.48
comp101288_c0	45.55	46.36	33.46	43.35	30.6	42.05	47.12	43.96	44.16
comp101289_c0	0	0	0.74	0.27	2.16	0.52	0.76	1.79	1.46
comp101289_c1	175.76	150.22	203.76	204.91	255.03	245.88	235.91	252.62	230.43
comp101290_c0	27.5	19.76	53.88	34.83	36.58	27.83	54	41.49	46.73
comp101291_c0	22.03	17.45	17.76	10.82	11.35	12.41	17.36	17.32	16.16
comp101291_c2	17.58	13.59	14.93	10.69	9.38	11.61	12.34	14.56	13.55
comp101292_c0	0.15	0	0	0.33	0.95	0	2.96	1.27	0
comp101292_c1	14.99	22.95	20.18	41.99	30.04	44.63	21.64	19.12	21.02
comp101293_c0	9.92	11.24	7.32	8.38	8.57	11.98	13.39	8.41	9.5
comp101294_c0	105.66	134.23	140.31	388.19	506.65	317.1	288.09	364.57	299.11
comp101295_c0	3.36	3.4	1.95	2.27	1.88	3.23	3.53	3.74	4.13
comp101295_c1	0	0	0	0	0	0	1.7	1	0
comp101295_c2	18.27	18.79	16.04	17.86	15.13	16.95	23.06	20.35	21.84
comp101295_c3	1.64	0.61	1.01	1.03	0.93	0.88	1.5	1.38	0.9
comp101296_c0	4.92	3.8	4.31	3.99	2.35	4.66	4.56	3.69	5.2
comp101296_c1	1.83	2.08	1.26	1.45	1.5	3.24	3.39	3.04	3.13
comp101297_c0	21.08	16.89	13.87	18.8	13.79	20.25	26.29	18.8	23.49
comp101298_c0	0.06	0.57	0.35	4.5	1.23	2.4	0.36	0.73	0.62
comp101298_c1	0	0	0	0	0	0	0	0.41	0
comp101298_c2	0	0.69	0	5.56	0.14	3.65	0.16	4.01	2.18
comp101298_c3	0.07	1.38	0.47	5.86	2.01	4.44	0.91	1.63	2.2
comp101298_c4	0.18	0.88	0.27	1.8	0.49	1.44	0.24	0.59	0.45
comp101298_c5	0	1.18	0	0	0	0	0.81	0.24	0
comp101299_c0	25.87	20.1	19.04	21.35	15.34	18.93	27.95	23.4	21.21
comp1012_c0	0	0	0	0.77	0	0.48	1.19	0.84	0
comp101300_c0	36.24	28.45	33.29	31.46	24.14	34.27	29.61	32.85	26.01
comp101301_c0	1.47	0.62	0.95	3.94	4.01	3.05	2.28	1.9	0.82
comp101301_c1	4.85	2.02	2.82	7.99	6.54	7.43	7.61	6.82	6.36
comp101301_c2	207.12	210.4	263.46	359.24	459.83	527.88	393.97	436.45	444.51
comp101302_c0	55.44	40.54	67.27	106.94	69.98	83.69	69.96	85.96	66.93
comp101303_c0	22.94	10.49	14	10.2	10.47	9.87	12.04	11.73	11.77
comp101304_c0	52.21	26.61	27.83	20.91	14.11	20.7	13.82	8.44	12.58
comp101305_c0	0	0	0	0	0	0	1.21	0	0
comp101305_c1	1.42	2.35	1.23	0	0.56	0	1.44	1.78	1.01
comp101305_c2	5.3	4.81	5.12	4.22	4.53	3.32	5.08	5.64	5.06
comp101306_c0	19.68	15.63	14.01	8.69	7.73	8.65	13.59	13.18	11.24
comp101307_c0	13.36	8.71	18.52	5.16	4.21	4.68	4.35	5.87	3.46
comp101308_c0	4.85	5.33	4.84	6.89	8.18	6.17	7.02	6.93	6.83
comp101309_c0	3.06	4.45	3.16	2.94	3.79	4.41	3.92	4	3.81
comp101310_c0	14.89	12.43	14.18	17.08	15.53	18.54	24.36	20.23	20.78
comp101311_c0	22.96	21.1	21.65	24.42	22.75	24.31	18.51	15.55	18.37
comp101312_c0	0.61	0.92	0.21	0.68	0.18	0	0.42	1.33	0
comp101312_c1	4.62	4.22	2.87	3.71	7.26	2.79	4.93	4.28	4.62
comp101313_c1	26.48	24.25	27.65	12.8	14.4	17.29	27.48	28.34	27.38
comp101314_c0	16.27	11.54	12.01	23.66	18.74	23.64	30.92	21.98	23.85
comp101315_c0	10.58	12.58	13.24	10.47	11.88	7.05	14.89	13.04	13.09
comp101316_c0	9.97	10.37	8.24	8.81	5.6	9.37	11.2	9.58	10.09
comp101316_c1	0.14	0.51	0.71	0	0.77	0	0.29	0	0.17
comp101317_c0	2.91	2.2	1.86	0.76	1.99	1.24	3.72	3.97	3.65
comp101317_c1	81.03	71.96	72.55	83.21	86.59	93.98	92.8	83.86	75.69
comp101317_c2	9.58	7.61	4.79	2.88	4.25	3.35	4.44	6.35	8.5
comp101318_c0	59.16	44.5	48.09	44.07	51.19	55.28	51.86	58.97	55.21
comp101319_c0	5.25	7.08	4.99	8.08	5.67	8.38	9.92	7.07	9.5
comp101319_c1	0.44	0	0.15	0	0.13	0.47	0.77	1.54	0.53
comp101319_c2	11.52	11.65	11.3	8.99	13.07	10.38	13.83	11.48	12.84
comp101319_c3	0.27	0.55	0.36	0.06	1.74	0.23	1.69	1.63	1.76
comp101319_c4	0.68	0.2	0.46	0.51	1.02	0	1.43	1.06	0.82
comp101319_c5	13.97	11.12	12.43	15.93	16.71	15.77	25.35	21.58	20.8
comp10131_c0	0	0.24	0	0	0	0	0	0	0
comp101320_c0	0.29	0.18	0.25	6.92	7.31	8.53	9.71	8.68	10.78
comp101321_c0	0	0.24	0	2.6	0.46	0.28	1.34	1.66	0.31
comp101321_c1	16.94	13.7	14.48	16.43	15.55	16.42	19.43	16.29	18.17
comp101322_c0	13.28	14.33	22.11	20.46	24.37	22.11	11.78	12.75	9.89
comp101322_c1	5.79	6.6	12.62	8.31	7.51	10.79	7.8	7.22	6.57
comp101323_c0	1.41	0.79	1.73	2.64	1.77	8.71	2.43	3.41	4
comp101324_c0	14.29	27.73	30.11	38.6	58.66	41.56	38.89	42.08	44.64
comp101325_c0	17.64	17.28	17.19	15.02	15.71	16.57	15.81	14.91	16.12
comp101326_c0	3.34	3.67	3.33	5.93	2.95	4.58	4.92	7.39	5.72
comp101327_c0	8.03	20.68	16.78	6.4	10.42	6.34	7.28	11.38	7.43
comp101328_c0	3.59	4.27	3.89	7.04	5.28	6.94	9.99	7.28	8.7
comp101328_c1	0	0	0	0	0	0	0	1.34	0
comp101329_c0	49.39	29.94	37.14	53.23	46.83	58.48	53.23	51.03	40.32
comp101330_c0	12.03	10.31	13.74	10.95	12.18	12.01	10.47	12.07	10.16
comp101331_c0	20.58	19.98	15.13	16.8	13.83	21.08	22.03	18.08	21.09
comp101332_c0	28.77	27.21	23.79	22.74	28.93	23.14	28.66	27.33	27.08
comp101332_c1	9.48	10.75	8.89	4.06	9.23	8.98	10.09	8.78	9.3
comp101332_c3	0.7	0.84	1.51	0.63	0.99	0.44	0.75	1.39	0.43
comp101333_c0	0	1.55	0.87	1.21	1.22	1.15	0.45	0.2	2.34
comp101333_c1	5.43	5.79	6.05	4.53	5.21	3.76	7.4	5.98	6.29
comp101334_c0	2.35	2.95	1.48	1.48	1.37	1.19	2.63	1.37	1.41
comp101335_c0	0.34	1.24	0.17	0	0.77	0.72	0.71	1.13	0
comp101335_c1	7.07	8.66	7	9.29	8.04	8.55	9.18	9.9	9.09
comp101336_c0	0.18	0.8	0.36	0.4	0.32	0.56	0	0	1.06
comp101336_c2	6.34	5.13	8	6.92	7.23	6.05	8.43	6.3	7.14
comp101336_c3	34.25	33.48	30.21	29.81	28.86	30.13	31.09	32.2	36.82
comp101337_c0	96.29	127.15	118.61	132.33	191.75	146.07	130.41	138.75	151.54
comp101338_c0	8.18	10.38	11.78	12.29	12.65	11.61	10.95	9.01	10.09
comp101339_c0	0	0.35	0	0.21	0.69	0.2	0	1.43	0.69
comp101339_c1	10.2	12.37	12.48	9.79	10.86	9.33	8.84	11.03	11.38
comp101339_c2	0	0.62	0	0.25	1.21	0.72	0.47	0	0.27
comp101339_c3	0	0.25	0	0	0	0	0	0	0
comp101339_c4	1.04	0.72	0.53	0.15	1.56	0.28	0	1.13	0.16
comp101340_c0	12.85	6.77	6.99	7.11	4.18	12.13	8.5	9.04	7.69
comp101341_c0	7.9	7.65	8.8	5.48	8.01	8.59	8.81	9.33	6.35
comp101342_c0	3.04	3.9	1.43	3.07	3.95	3.16	4.23	5.74	3.84
comp101343_c0	13.6	11.54	9.92	14.7	11.91	14.64	17.3	17.4	16.18
comp101344_c0	3.87	1.87	3.63	1.83	1.29	3.46	3	1.9	2.48
comp101345_c0	2.59	2.68	4.44	2.96	2.88	3.75	4.13	4.05	2.83
comp101346_c0	177.24	206.75	195.18	276.65	282.79	317.39	194.76	252.03	256.49
comp101347_c0	29.88	28.22	25.74	21.19	21.06	29.59	34.23	21.88	29.42
comp101347_c1	26.13	24.14	20.87	23.91	19.81	26.23	26.64	23.22	21.24
comp101348_c0	2.59	1.72	2.06	3.24	1.55	1.6	3.99	3.97	2.1
comp101349_c0	8.19	8.19	6.97	7.82	6.09	8.08	10.4	9.96	12.03
comp101349_c1	6.69	5.8	4.97	3.93	4.31	4.7	4.4	10.59	7.29
comp101350_c0	5.36	7.64	7.3	2.59	2.71	2.42	2.67	2.48	1.8
comp101351_c1	41.43	35.55	35.54	39.8	33.46	38.69	43.94	41.25	44.98
comp101352_c0	28.9	38.97	33.24	42.38	48.1	74.7	38.76	42.51	53.51
comp101353_c0	223.37	188.97	210.81	140.47	129.5	164.58	146.87	143.1	166.51
comp101354_c0	79.44	70.27	62.59	55.93	54.6	57.69	60.96	57.53	57.66
comp101355_c0	7.42	8.16	12.13	27.85	21.6	21	14.16	20.73	22.32
comp101356_c0	57.03	32.14	39.44	61.57	37.34	114.34	60.2	72.23	68.89
comp101357_c0	67.22	68.36	50.29	49.46	35.96	47.24	61.61	56.07	58.26
comp101357_c1	3.65	2.73	1.01	2.05	0.91	2.11	2.45	1.26	6.22
comp101358_c0	7.95	11.03	8.53	38.77	35.49	35.82	12.29	11.47	12.95
comp101358_c1	1.33	0	1.74	1.92	0.86	1.21	0	0.9	1.61
comp101358_c2	0	1.01	0	0.25	0.79	0	0.23	0	0.53
comp101359_c0	230.24	270.11	272.03	185.56	202.06	194.39	192.98	185.45	191.21
comp101360_c0	6.78	5.24	3.59	6.79	5.19	6.51	10.38	8.82	8.02
comp101361_c0	64.96	51.84	85.62	33.75	30.79	43.74	29.28	38.65	34.06
comp101362_c0	213.07	175.89	242.55	44.47	42.68	32.28	54.88	39.88	47.25
comp101363_c0	14.91	15.78	11.97	16.57	10.21	15.88	17.85	18.27	17.58
comp101364_c0	4.4	7.39	4.2	5.94	5.01	2.01	4.2	6.42	3.85
comp101364_c1	164.03	273.56	280.93	341.42	483.5	242.93	327.01	413.32	315.12
comp101365_c0	0.81	1.49	0.62	1.14	0.73	1.51	1.7	0.95	3.68
comp101365_c1	4.96	4.87	3.98	4.91	4.48	5.58	5.67	5.39	6.64
comp101366_c0	2.88	3.12	3.26	3.61	3.47	3.31	3.71	2.98	2.58
comp101367_c0	22.16	19.11	17.72	13.24	12.36	12.72	15.49	14.42	17.76
comp101368_c0	21.86	19.84	22.73	20.12	20.52	20.72	21.35	16.31	19.52
comp101369_c0	32.03	37.77	30.4	50.09	53.23	52.54	74.69	66.02	67.36
comp101370_c0	42.54	54.01	58	44.61	51.49	46.53	46.49	47.31	54.52
comp101371_c0	5.81	4.77	4.11	2.91	9.17	3.98	5.97	4.63	5.8
comp101372_c0	40.28	41.05	27.36	42.71	27.62	45.2	49.23	47.92	49.28
comp101373_c0	259.58	234.27	204.29	258.38	189.35	224.94	258.58	242.98	237.05
comp101374_c0	42.14	28.56	28.7	27.51	23.48	29.11	31.21	28.07	32.31
comp101375_c0	120.74	103.96	99.86	116.47	97.4	128.7	127.29	124	136.71
comp101376_c0	14.51	16.3	12.3	15.07	15.02	16.09	20.38	19.26	22.88
comp101377_c0	333.52	358.68	356.09	251	195.34	336.61	297.75	267.3	314.52
comp101378_c0	84.33	128.19	103.34	99.29	151.78	116.5	95.88	95.08	100.38
comp101379_c1	9.27	9.1	10.98	9.03	8.23	9.53	10.93	9.68	16.39
comp101380_c0	4.73	5.11	3.45	5.05	5.07	3.93	6.49	6.13	6.14
comp101380_c2	102.76	95.69	92.96	98.42	81.16	96.93	110.54	116.24	114.21
comp101380_c3	2.34	2.16	1.63	1.38	0.55	0.87	2.34	2.44	3.01
comp101381_c0	24.04	17.89	13.29	20.56	15.5	24.26	27.8	26.85	24.83
comp101382_c0	10.74	12.15	10.67	9.37	8.34	11.48	11.69	10.51	10.75
comp101383_c0	77.36	57.93	69.24	52.67	60.86	49.83	59.95	45.35	42.56
comp101384_c0	6.14	5.97	5.55	5.65	5.49	7.02	7.1	6.65	4.55
comp101385_c0	0	1	0	0.18	0.14	0	0	0	0.94
comp101385_c1	4.01	4.98	3.14	4.63	4.63	6.23	6.34	5.18	4.15
comp101385_c2	3.84	4.6	3.73	7.2	5.82	9.42	7.48	8.77	7.17
comp101386_c0	160.91	200.74	182.87	150	131.42	145.84	145.87	140.05	144.5
comp101387_c0	98.26	107.76	92.32	108.36	93.95	114.53	138.47	119.23	131.6
comp101388_c0	35.86	52.46	56.3	61.66	54.53	58.23	63.67	63.32	57.01
comp101389_c0	78.45	83.3	91.54	318.9	206.39	221.61	203.04	256.15	215.31
comp101390_c0	5.56	5.01	4.88	5.68	5.25	4.92	7.61	5.66	6.62
comp101391_c0	32.94	31.4	33.24	13.27	14.82	20.84	39.46	34.76	43.68
comp101392_c1	3.02	1.38	1.93	2.67	3.44	1.4	2.48	2.71	2.27
comp101392_c2	1.09	1.05	1.37	1.72	1.26	1.61	1.99	1.38	1.97
comp101393_c1	7.89	7.11	6.77	8.89	7.03	8.9	9.67	11.98	9.09
comp101394_c0	6.64	5.51	5.84	5.88	5.26	5.2	7.53	7.12	7.66
comp101394_c1	2.73	1.41	2.47	1.73	1.12	1.51	1.28	1.6	1.47
comp101395_c0	269.07	227.45	194.73	293	189.88	239.75	283.75	264.85	280.79
comp101396_c0	0	1.29	0.41	0	0	1.07	1.91	0.57	1.95
comp101396_c1	12.53	14.64	14.95	8.28	10.51	8.73	8.83	9.77	7.54
comp101397_c0	9.93	11.58	9.93	8.07	7.25	11.4	14.27	17.51	19.28
comp101398_c1	9.43	9.18	11.6	8.58	8.69	9.43	9.45	8.21	8.07
comp101398_c2	0.53	0	0.4	0.3	0.61	0.84	1.67	0.63	0.32
comp101399_c0	5.39	2.33	5.46	6.43	7.68	11.07	8.14	6.4	8.7
comp101400_c0	10.47	8.51	7.46	10.73	7.77	9.04	9.97	9.74	8.36
comp101401_c0	10	11.22	6.94	11.28	9.74	12.6	19.06	13.85	17.84
comp101401_c1	35.92	32.06	36.88	29.47	28.61	37.76	42.05	39.46	36.91
comp101402_c0	8.98	7.17	10.69	10.81	9.54	10.62	9.51	9.89	9.55
comp101403_c0	10.83	9.37	8.67	11.56	12.77	14.05	13.08	11.81	14.35
comp101404_c0	17.73	17.25	14.59	11.27	12.35	10.51	12.66	13.79	15.72
comp101405_c0	9.67	11.38	9.24	8.96	7.65	8.86	10.35	8.64	10.06
comp101406_c0	6.13	4.61	5.22	5.16	5.23	6.67	6.44	7	6.48
comp101407_c0	2.1	2.64	1.47	1.24	1.97	1.34	2.16	3.21	1.74
comp101407_c2	20.26	22.24	17.03	19.11	15	16.59	21.32	24.08	25.81
comp101407_c3	0	0	0	0	0	0	0	0.27	0
comp101408_c0	92.55	92	86.65	75.34	96.87	89.09	124.18	114.59	103.61
comp101408_c1	2.56	3.2	3.21	3.11	3.84	2.14	4.23	3.97	3.41
comp101409_c0	9.96	8.47	12.58	8.25	10.48	10.77	9.05	8.32	8.68
comp101410_c0	8.55	11.38	8.15	2.61	5.04	3.51	5.58	5.46	4.12
comp101411_c0	10.27	7.3	5.89	10.69	5.39	12.04	11.37	10.09	11.93
comp101412_c0	8.99	7.3	17.14	16.86	28.39	30.63	17.93	15.69	26.05
comp101412_c1	151.56	100.57	100.82	142.96	157.8	214.3	173.72	171.55	227.63
comp101413_c0	0.18	1.35	0.38	0.83	1.51	0	0	0.7	0.22
comp101413_c1	30.81	27.34	20.47	20.72	22.24	21.58	27.15	28.22	22.52
comp101414_c0	3.03	2.7	2.98	3.77	3.81	3.34	4.18	3.71	3.87
comp101415_c1	0	0	0	0	0	0	0.59	0.52	0.34
comp101415_c2	0.16	0.14	1.12	0.88	0.86	0.5	0	0	0
comp101415_c3	11.59	13.96	13.57	18.81	20.32	23.32	19.8	18.45	18.32
comp101416_c0	3.84	2.7	5.73	4.92	3.78	3.85	4	3.7	4.24
comp101417_c0	6.56	5.98	6.64	5.93	8.92	4.05	4.86	6.51	7.39
comp101417_c1	37.14	41.08	30.06	32.18	28.52	37.6	53.5	46.85	43.89
comp101418_c0	16.79	11.83	17.57	8.04	11.51	12.61	13.09	11.95	12.62
comp101418_c3	29.96	10.53	14.63	20.13	6.73	9.39	7.59	13.53	9.76
comp101419_c0	73.37	52.35	66.01	65.13	63.12	67.15	55.3	53.48	54.89
comp101420_c0	10.45	9.77	10.73	10.17	9.48	12.46	11.17	10.83	11.96
comp101421_c2	0.92	1.17	0.94	0.91	0.43	1.1	0.37	1.23	1.26
comp101421_c3	8.38	8.72	8.96	5.88	7.69	7.05	9.69	9.56	10.05
comp101422_c0	12.07	13.07	11.16	12.25	12.09	16.54	20.25	17.06	17.71
comp101423_c0	16.62	25.37	19.15	48.45	47.59	44.09	36.41	50.18	41.77
comp101424_c0	24.3	25.14	18.39	22.23	20.54	23.75	25.95	26.82	24.79
comp101424_c1	0.12	0.23	0.38	0.14	0.19	0.79	1.45	0	0.15
comp101424_c2	2.06	2.24	2.11	1.8	0.96	1.29	0.4	0.83	0.91
comp101424_c3	2.65	0.88	1.05	0.69	1.28	0.65	3.78	2.09	2.41
comp101424_c4	10.49	11.4	10.12	12.35	10.46	9.52	12.81	16.04	10.05
comp101425_c0	7.47	8.22	11.01	4.59	5.51	4.67	6.01	6.8	5.64
comp101426_c0	26.59	18.49	17.51	25.07	29.85	10.26	25.76	32.64	21.39
comp101427_c0	1.51	1.53	0.95	1.88	1.62	0.98	0.94	0.68	2.09
comp101427_c1	44.63	42.01	39.97	41.99	35.66	41.13	47.2	40.38	42.15
comp101428_c0	18.67	15.43	13.67	14.8	10.49	18.82	21.75	23.6	23.44
comp101429_c0	4.79	4.7	5.06	3.26	1.69	3	3.32	2.91	2.61
comp101430_c0	17.34	9.99	16.33	22.38	19.89	28.15	25.16	21.9	23.4
comp101431_c0	61.01	46.07	76.39	55.97	20.76	61.14	57.62	53.87	53.87
comp101432_c0	7.47	10.75	11.04	27.38	28.64	20.66	19.62	22.71	18.74
comp101433_c0	5.35	4.66	6.07	0.84	2.2	1.88	1.49	1.19	1.24
comp101434_c0	22.61	17.4	15.8	24.27	28.65	25.96	31.31	26.83	20.66
comp101434_c1	11.14	11.15	9.21	14.04	11.36	13.88	14.66	15.85	13.13
comp101435_c0	13.49	18.79	34.3	8.18	8.77	22.65	7.06	10	8.66
comp101436_c1	1.82	1.6	2.32	1.18	1.71	1.66	1.58	2.14	2.33
comp101436_c2	0.65	2.22	0.99	0.55	0.04	0.23	0.72	0.44	0.21
[truncated: 63,386 more rows]
