# Supplementary material for: Identification of conserved genes involved in nitrogen metabolic activities in wheat
Source: PeerJ. 2019 Jul 9;7:e7281. doi: 10.7717/peerj.7281 (PMC6625498; doi:10.7717/peerj.7281)
Supplement: Table S3 [file peerj-07-7281-s004.xlsx]

## Sheet: Sheet1
Supplementary Table S2. Annotation and sequence of the three nitrogen metabolism related genes.
Gene	Transcript	Swissprot annotation	GO annotation	KEGG annotation	nr annotation	nt annotation	Sequence
TaPAP	comp106201_c0	Probable inactive purple acid phosphatase 27 OS=Arabidopsis thaliana GN=PAP27 PE=2 SV=1	Molecular Function: acid phosphatase activity (GO:0003993); Molecular Function: protein serine/threonine phosphatase activity (GO:0004722); Cellular Component: mitochondrion (GO:0005739); Biological Process: protein dephosphorylation (GO:0006470); Biological Process: cellular aromatic compound metabolic process (GO:0006725); Biological Process: response to stress (GO:0006950); Cellular Component:…	--	Putative inactive purple acid phosphatase 27 [Aegilops tauschii]	TSA: Triticum aestivum TA_RNA_000106 transcribed RNA sequence	GGGAGATACAAAGCCAGGAAAGCATACACGCTAGCTCACAAACAGATCAAAGATGGTAAACTAGCAATTTTTGCAGGAACCCAGAGATGCTCCAGGGTTCAGCGCCAGGCGATCCTACGCAATTCCTCTCTTTGATGGGCCAACAGTCTTAAGCACCGAAGAAGAAGTGCACCCTGAGCCTCTGACCATAGGATTTTCCATTGCCTGATCGTTGCACCCAACGGATCCAAAGCACAGCATATACTTCGCCATCTTCACCCCTTGCTTCAAGCCTTTTCCCCTAGCAAAGTGGGGGCCATTTGTGTCATTAATTCCAACCTGAAAAGTTCCTTGGTGAATAGTAGACATAACCCAACCAACTCATTTACTGCCAAAACCTCTAGACAGAAGCATTTTCTT…
TaUPS	comp107474_c0	Ureide permease 1 OS=Arabidopsis thaliana GN=UPS1 PE=1 SV=1	Molecular Function: allantoin uptake transmembrane transporter activity (GO:0005274); Cellular Component: mitochondrion (GO:0005739); Cellular Component: plasma membrane (GO:0005886); Biological Process: fatty acid beta-oxidation (GO:0006635); Cellular Component: chloroplast (GO:0009507); Biological Process: gene expression (GO:0010467); Molecular Function: uracil transmembrane transporter activi…	--	predicted protein [Hordeum vulgare subsp. vulgare]	TSA: Triticum turgidum UCW_Tt-k41_contig_11238 transcribed RNA sequence	TTCAAACCACCCATAAGATGTGACATGCGTCGCACTTGTCCAAATTACTACTCCCTTCGTTCAAAATTACTTGCCGTGGTTTTAGTTTAGGAGCACACAACATCCGCCTCGTCGAAGAACTTTACTGTAGCCTCTCTGCCGTTGCTACATGTACAAGGTCCCCATTGGCATGCATGAGCAGCGGTGGTTGCGTCAGAGCGGCTTCCTGTGCGCGGAGGAGGCCATGAGCACGGCCATGGCGACGACGAACATGAAGAGCATGCTCCCCAGCAGCGTGTAGGTCCTCCGCGACGACCTCCGGTACTCCCCGAACAGCACCACGCCCCAGAGCGTGCTCACCAGCGGCAGCGCCTGCACGGAGTCCGCCGCCGCGTACCCGGCCGCCTGCCCGGCCATGAA…
TaNMR	comp95880_c0	--	--	--	hypothetical protein TRIUR3_26878 [Triticum urartu]	TSA: Triticum aestivum TA_RNA_052002 transcribed RNA sequence	CAGCGTCCTTATACAAAACTGCCGACGAGTTACTAGTTGTTCTATCTGATCTCGCGGTATCAGATCTCCCAGAGAAGGTGCAGAATCATGACTCTTCTCGCCACGGTTGGTCAGCCTCATCCTCCGTCGAAGGTGATCTCCCGCCGCGAGCACTCCAACCGGGGGCACAAGCTGACCCGGGAGCCGACGGGCCAGGCCAAGTTCAAGTGCAACGGCTGCCTCGAGGAGATCACGGGGTGCGACAGGGACACGTGCAAGCCTTGTGACTTCGACCTCCACCAGGCCTGCAACTACAAAGAAGGGACCACGCTGGAGCACCAGCTGCTGCCCAAGAGCAAGTTCGTGCTCCGCCTCGAGGCCCCCCCTTCCAAGCAGCGATGCAGCGCCTGCGGCACCCGC…
Note: "--" means that data are not available.
